# Supplementary material for: Rumen metagenome and metatranscriptome analyses of low methane yield sheep reveals a Sharpea-enriched microbiome characterised by lactic acid formation and utilisation
Source: PubMed Central journal article supplement (PMC5069950; doi:10.1186/s40168-016-0201-2), 2016-10-19
Supplement: 40168_2016_201_MOESM3_ESM.pdf [file 40168_2016_201_MOESM3_ESM.pdf]

- 1 Table S2. KEGG genes from metagenome (DNA) and metatranscriptome (RNA) data commonly identified in sparse partial least squares analysis (sPLS) and
- 2 Wilcoxon Rank Sum test (WRS) correlated to methane yield / significantly differentially abundant between high and low methane yield sheep.

| Data type | High/Low methane related | Mean low | Mean high | sPLS                    | WRS      |             | KEGG gene | Definition                                                                                                    | Pathways                                                                                                                                 |
|-----------|--------------------------|----------|-----------|-------------------------|----------|-------------|-----------|---------------------------------------------------------------------------------------------------------------|------------------------------------------------------------------------------------------------------------------------------------------|
|           |                          |          |           | correlation coefficient | p.adj.BH | fold change |           |                                                                                                               |                                                                                                                                          |
| DNA       | High                     | 2.71     | 4.55      | 0.0159                  | 0.0472   | 1.68        | K00311    | electron-transferring-flavoprotein dehydrogenase [EC:1.5.5.1]                                                 | -                                                                                                                                        |
| DNA       | High                     | 0.08     | 0.28      | 0.0146                  | 0.0145   | 3.59        | K00539    | oxidoreductase E1.97.1.-                                                                                      | DDT degradation-Chlorocyclohexane and chlorobenzene degradation-Bisphenol degradation-Chloroalkane and chloroalkene degradation          |
| DNA       | High                     | 170.53   | 236.29    | 0.0167                  | 0.0086   | 1.39        | K00666    | fatty-acyl-CoA synthase [EC:6.2.1.-]                                                                          | -                                                                                                                                        |
| DNA       | High                     | 5.75     | 9.02      | 0.0128                  | 0.0086   | 1.57        | K00758    | thymidine phosphorylase [EC:2.4.2.4]                                                                          | Pyrimidine metabolism-Drug metabolism - other enzymes-Bladder cancer                                                                     |
| DNA       | High                     | 0.02     | 0.05      | 0.0144                  | 0.0145   | 2.24        | K00827    | alanine-glyoxylate transaminase / (R)-3-amino-2-methylpropionate-pyruvate transaminase [EC:2.6.1.44 2.6.1.40] | Alanine, aspartate and glutamate metabolism-Glycine, serine and threonine metabolism                                                     |
| DNA       | High                     | 0.05     | 0.14      | 0.0127                  | 0.0145   | 2.47        | K00953    | FAD synthetase [EC:2.7.7.2]                                                                                   | Riboflavin metabolism                                                                                                                    |
| DNA       | High                     | 0.17     | 0.53      | 0.0129                  | 0.019    | 3.21        | K01160    | crossover junction endodeoxyribonuclease RusA [EC:3.1.22.4]                                                   | -                                                                                                                                        |
| DNA       | High                     | 1.84     | 3.87      | 0.0176                  | 0.0086   | 2.11        | K01342    | subtilisin [EC:3.4.21.62]                                                                                     | -                                                                                                                                        |
| DNA       | High                     | 0.49     | 0.78      | 0.0142                  | 0.0086   | 1.6         | K01631    | 2-dehydro-3-deoxyphosphogalactonate aldolase [EC:4.1.2.21]                                                    | Galactose metabolism                                                                                                                     |
| DNA       | High                     | 0.99     | 3.33      | 0.0147                  | 0.0086   | 3.36        | K01792    | glucose-6-phosphate 1-epimerase [EC:5.1.3.15]                                                                 | Glycolysis / Gluconeogenesis                                                                                                             |
| DNA       | High                     | 4.26     | 13.27     | 0.0137                  | 0.0086   | 3.12        | K01846    | methylaspartate mutase [EC:5.4.99.1]                                                                          | C5-Branched dibasic acid metabolism                                                                                                      |
| DNA       | High                     | 392.89   | 461.35    | 0.0147                  | 0.0408   | 1.17        | K01912    | phenylacetate-CoA ligase [EC:6.2.1.30]                                                                        | Phenylalanine metabolism                                                                                                                 |
| DNA       | High                     | 12.86    | 19.32     | 0.0186                  | 0.0086   | 1.5         | K01913    | trans-2-methyl-5-isopropylhexa-2,5-dienoate-CoA ligase                                                        | Aminobenzoate degradation-Limonene and pinene degradation-Caprolactam degradation-Tropane, piperidine and pyridine alkaloid biosynthesis |
| DNA       | High                     | 0.79     | 1.87      | 0.0142                  | 0.0472   | 2.36        | K02674    | type IV pilus assembly protein PilY1                                                                          | -                                                                                                                                        |
| DNA       | High                     | 19.75    | 37.58     | 0.0129                  | 0.0408   | 1.9         | K02856    | L-rhamnose-H <sup>+</sup> transport protein                                                                   | -                                                                                                                                        |
| DNA       | High                     | 1.22     | 3.71      | 0.0159                  | 0.0233   | 3.03        | K03219    | type III secretion protein SctC                                                                               | Bacterial secretion system                                                                                                               |
| DNA       | High                     | 0.80     | 2.52      | 0.0164                  | 0.0233   | 3.13        | K03222    | type III secretion protein SctJ                                                                               | Bacterial secretion system                                                                                                               |
| DNA       | High                     | 0.46     | 1.31      | 0.0153                  | 0.0086   | 2.83        | K03223    | type III secretion protein SctL                                                                               | Bacterial secretion system                                                                                                               |
| DNA       | High                     | 2.47     | 8.32      | 0.0153                  | 0.0086   | 3.37        | K03224    | ATP synthase in type III secretion protein SctN [EC:3.6.3.14]                                                 | Bacterial secretion system                                                                                                               |
| DNA       | High                     | 1.23     | 3.78      | 0.0141                  | 0.0086   | 3.06        | K03226    | type III secretion protein SctR                                                                               | Bacterial secretion system                                                                                                               |
| DNA       | High                     | 0.46     | 1.54      | 0.016                   | 0.0086   | 3.33        | K03227    | type III secretion protein SctS                                                                               | Bacterial secretion system                                                                                                               |
| DNA       | High                     | 1.11     | 3.57      | 0.0149                  | 0.0086   | 3.21        | K03228    | type III secretion protein SctT                                                                               | Bacterial secretion system                                                                                                               |
| DNA       | High                     | 1.60     | 5.05      | 0.0151                  | 0.0086   | 3.16        | K03229    | type III secretion protein SctU                                                                               | Bacterial secretion system                                                                                                               |
| DNA       | High                     | 3.68     | 12.22     | 0.0152                  | 0.0086   | 3.32        | K03230    | type III secretion protein SctV                                                                               | Bacterial secretion system                                                                                                               |
| DNA       | High                     | 32.74    | 51.71     | 0.0149                  | 0.0472   | 1.58        | K03579    | ATP-dependent helicase HrpB [EC:3.6.4.13]                                                                     | -                                                                                                                                        |
| DNA       | High                     | 0.17     | 0.4       | 0.0162                  | 0.0484   | 2.33        | K04058    | type III secretion protein SctW                                                                               | Bacterial secretion system                                                                                                               |
| DNA       | High                     | 0.76     | 1.4       | 0.0187                  | 0.0086   | 1.85        | K04874    | potassium voltage-gated channel Shaker-related subfamily A member 1                                           | -                                                                                                                                        |
| DNA       | High                     | 0.06     | 0.13      | 0.0134                  | 0.0086   | 2           | K05830    | acetylorntine/LysW-gamma-L-lysine aminotransferase [EC:2.6.1.11 2.6.1.-]                                      | Lysine biosynthesis-Arginine and proline metabolism-2-Oxocarboxylic acid metabolism-Biosynthesis of amino acids                          |

|     |      |        |        |         |        |       |        |                                                                      |                                                                         |
|-----|------|--------|--------|---------|--------|-------|--------|----------------------------------------------------------------------|-------------------------------------------------------------------------|
| DNA | High | 0.06   | 0.13   | 0.0168  | 0.0086 | 2.32  | K07249 | retinal dehydrogenase [EC:1.2.1.36]                                  | Retinol metabolism                                                      |
| DNA | High | 0.01   | 0.05   | 0.0119  | 0.0086 | 5.82  | K07283 | putative salt-induced outer membrane protein                         | -                                                                       |
| DNA | High | 1.01   | 3.32   | 0.0154  | 0.0086 | 3.3   | K07796 | Cu(I)/Ag(I) efflux system outer membrane protein CusC/SilC           | Two-component system                                                    |
| DNA | High | 0.00   | 0.03   | 0.0157  | 0.0453 | 6.92  | K08605 | coccolysin [EC:3.4.24.30]                                            | -                                                                       |
| DNA | High | 0.17   | 0.42   | 0.0165  | 0.0086 | 2.5   | K08635 | membrane metallo-endopeptidase-like 1                                | -                                                                       |
| DNA | High | 0.03   | 0.14   | 0.014   | 0.019  | 4.4   | K08636 | phosphate-regulating neutral endopeptidase [EC:3.4.24.-]             | -                                                                       |
| DNA | High | 130.14 | 167.09 | 0.0143  | 0.0384 | 1.28  | K08641 | D-alanyl-D-alanine dipeptidase [EC:3.4.13.22]                        | -                                                                       |
| DNA | High | 0.07   | 0.35   | 0.0149  | 0.0305 | 5.01  | K09610 | endothelin-converting enzyme-like 1 [EC:3.4.24.-]                    | -                                                                       |
| DNA | High | 0.01   | 0.07   | 0.0159  | 0.0145 | 8.6   | K09711 | hypothetical protein                                                 | -                                                                       |
| DNA | High | 0.36   | 0.7    | 0.0109  | 0.0472 | 1.94  | K09716 | hypothetical protein                                                 | -                                                                       |
| DNA | High | 0.02   | 0.09   | 0.0119  | 0.019  | 4.25  | K09744 | hypothetical protein                                                 | -                                                                       |
| DNA | High | 0.11   | 0.27   | 0.0177  | 0.019  | 2.43  | K10060 | C-type lectin domain family 4 member F                               | -                                                                       |
| DNA | High | 1.40   | 2.18   | 0.0172  | 0.0086 | 1.56  | K10243 | -                                                                    | -                                                                       |
| DNA | High | 0.03   | 0.08   | 0.0176  | 0.0086 | 3.13  | K10639 | E3 ubiquitin-protein ligase CCNP1IP1 [EC:6.3.2.19]                   | -                                                                       |
| DNA | High | 0.10   | 0.29   | 0.0145  | 0.0145 | 2.86  | K11382 | MFS transporter, OPA family, phosphoglycerate transporter protein    | Two-component system                                                    |
| DNA | High | 0.53   | 1.53   | 0.0152  | 0.019  | 2.87  | K11900 | type VI secretion system protein ImpC                                | -                                                                       |
| DNA | High | 0.02   | 0.06   | 0.0125  | 0.0086 | 2.81  | K12204 | defect in organelle trafficking protein DotC                         | -                                                                       |
| DNA | High | 0.11   | 0.23   | 0.0135  | 0.019  | 2.14  | K12206 | intracellular multiplication protein IcmB                            | -                                                                       |
| DNA | High | 0.00   | 0.01   | 0.0173  | 0.0086 | 21.48 | K12221 | intracellular multiplication protein IcmS                            | -                                                                       |
| DNA | High | 0.04   | 0.11   | 0.0113  | 0.0086 | 2.66  | K12434 | polyketide synthase 7                                                | -                                                                       |
| DNA | High | 0.01   | 0.05   | 0.0148  | 0.019  | 4.43  | K12448 | UDP-arabinose 4-epimerase [EC:5.1.3.5]                               | Amino sugar and nucleotide sugar metabolism                             |
| DNA | High | 0.08   | 0.23   | 0.0151  | 0.0268 | 3.09  | K13085 | phosphatidylinositol-4,5-bisphosphate 4-phosphatase [EC:3.1.3.78]    | Bacterial invasion of epithelial cells-Shigellosis-Salmonella infection |
| DNA | High | 0.23   | 0.86   | 0.0161  | 0.0086 | 3.7   | K13600 | chlorophyllide a oxygenase [EC:1.14.13.122]                          | Porphyrin and chlorophyll metabolism                                    |
| DNA | High | 0.71   | 1.76   | 0.0168  | 0.0086 | 2.47  | K13670 | putative glycosyltransferase [EC:2.4.-.-]                            | -                                                                       |
| DNA | High | 2.00   | 5.82   | 0.014   | 0.0453 | 2.9   | K13893 | microcin C transport system substrate-binding protein                | ABC transporters                                                        |
| DNA | High | 0.13   | 0.39   | 0.0155  | 0.0086 | 2.91  | K14275 | D-xylonate dehydratase                                               | Pentose and glucuronate interconversions                                |
| DNA | High | 0.01   | 0.07   | 0.0184  | 0.019  | 6.63  | K14324 | histone deacetylase complex subunit SAP18                            | RNA transport-mRNA surveillance pathway                                 |
| DNA | High | 0.75   | 2.81   | 0.0171  | 0.0086 | 3.73  | K14333 | 2,3-dihydroxybenzoate decarboxylase [EC:4.1.1.46]                    | Benzoate degradation-Aminobenzoate degradation                          |
| DNA | High | 1.70   | 3.94   | 0.0174  | 0.0086 | 2.31  | K14414 | transcriptional regulatory protein RtcR                              | -                                                                       |
| DNA | High | 0.03   | 0.09   | 0.0146  | 0.0086 | 3.13  | K14426 | solute carrier family 12 (sodium/chloride transporter), member 3     | -                                                                       |
| DNA | High | 0.16   | 0.34   | 0.018   | 0.033  | 2.11  | K14429 | solute carrier family 12 (potassium/chloride transporters), member 9 | -                                                                       |
| DNA | High | 0.08   | 0.23   | 0.0152  | 0.0086 | 2.95  | K12217 | intracellular multiplication protein IcmO                            | -                                                                       |
| DNA | Low  | 50.87  | 15.04  | -0.0097 | 0.0086 | 3.38  | K00005 | glycerol dehydrogenase [EC:1.1.1.6]                                  | Glycerolipid metabolism                                                 |

|     |     |        |       |         |        |       |        |                                                                                     |                                                                                                                                                                                                                                                                                                                                                                                                                                             |
|-----|-----|--------|-------|---------|--------|-------|--------|-------------------------------------------------------------------------------------|---------------------------------------------------------------------------------------------------------------------------------------------------------------------------------------------------------------------------------------------------------------------------------------------------------------------------------------------------------------------------------------------------------------------------------------------|
| DNA | Low | 92.78  | 62.57 | -0.0069 | 0.0359 | 1.48  | K00016 | L-lactate dehydrogenase [EC:1.1.1.27]                                               | Glycolysis / Gluconeogenesis-Cysteine and methionine metabolism-Pyruvate metabolism-Propanoate metabolism                                                                                                                                                                                                                                                                                                                                   |
| DNA | Low | 0.28   | 0.08  | -0.0124 | 0.0145 | 3.45  | K00119 |                                                                                     | Phosphonate and phosphinate metabolism                                                                                                                                                                                                                                                                                                                                                                                                      |
| DNA | Low | 108.76 | 74.54 | -0.0073 | 0.0484 | 1.46  | K00128 | aldehyde dehydrogenase (NAD+) [EC:1.2.1.3]                                          | Glycolysis / Gluconeogenesis-Pentose and glucuronate interconversions-Ascorbate and aldarate metabolism-Fatty acid degradation-Valine, leucine and isoleucine degradation-Lysine degradation-Arginine and proline metabolism-Histidine metabolism-Tryptophan metabolism-beta-Alanine metabolism-Glycerolipid metabolism-Pyruvate metabolism-Chloroalkane and chloroalkene degradation-Propanoate metabolism-Limonene and pinene degradation |
| DNA | Low | 8.97   | 5.65  | -0.0065 | 0.0233 | 1.59  | K00224 |                                                                                     | DDT degradation-Chlorocyclohexane and chlorobenzene degradation-Polycyclic aromatic hydrocarbon degradation                                                                                                                                                                                                                                                                                                                                 |
| DNA | Low | 3.41   | 2.32  | -0.0071 | 0.0408 | 1.47  | K00251 | 3-oxo-5-beta-steroid 4-dehydrogenase [EC:1.3.1.3]                                   | Primary bile acid biosynthesis-Steroid hormone biosynthesis                                                                                                                                                                                                                                                                                                                                                                                 |
| DNA | Low | 7.65   | 0.48  | -0.0097 | 0.0086 | 15.93 | K00366 | ferredoxin-nitrite reductase [EC:1.7.7.1]                                           | Nitrogen metabolism                                                                                                                                                                                                                                                                                                                                                                                                                         |
| DNA | Low | 29.20  | 10.38 | -0.0058 | 0.0145 | 2.81  | K00383 | glutathione reductase (NADPH) [EC:1.8.1.7]                                          | Glutathione metabolism-Thyroid hormone synthesis                                                                                                                                                                                                                                                                                                                                                                                            |
| DNA | Low | 29.87  | 11.99 | -0.008  | 0.0086 | 2.49  | K00394 | adenylylsulfate reductase, subunit A [EC:1.8.99.2]                                  | Sulfur metabolism                                                                                                                                                                                                                                                                                                                                                                                                                           |
| DNA | Low | 30.05  | 14.8  | -0.0062 | 0.0268 | 2.03  | K00459 | nitronate monooxygenase [EC:1.13.12.16]                                             | Nitrogen metabolism                                                                                                                                                                                                                                                                                                                                                                                                                         |
| DNA | Low | 2.89   | 1.27  | -0.0072 | 0.033  | 2.27  | K00462 | biphenyl-2,3-diol 1,2-dioxygenase [EC:1.13.11.39]                                   | Chlorocyclohexane and chlorobenzene degradation-Dioxin degradation-Degradation of aromatic compounds                                                                                                                                                                                                                                                                                                                                        |
| DNA | Low | 14.36  | 1.29  | -0.0082 | 0.0086 | 11.16 | K00526 | ribonucleoside-diphosphate reductase beta chain [EC:1.17.4.1]                       | Purine metabolism-Pyrimidine metabolism                                                                                                                                                                                                                                                                                                                                                                                                     |
| DNA | Low | 37.82  | 17.78 | -0.0065 | 0.0384 | 2.13  | K00547 | homocysteine S-methyltransferase [EC:2.1.1.10]                                      | Cysteine and methionine metabolism                                                                                                                                                                                                                                                                                                                                                                                                          |
| DNA | Low | 76.62  | 42.74 | -0.008  | 0.0086 | 1.79  | K00549 | 5-methyltetrahydropteroyltriglutamate--homocysteine methyltransferase [EC:2.1.1.14] | Cysteine and methionine metabolism-Selenocompound metabolism-Biosynthesis of amino acids                                                                                                                                                                                                                                                                                                                                                    |
| DNA | Low | 21.25  | 11.85 | -0.0066 | 0.0305 | 1.79  | K00563 | 23S rRNA (guanine745-N1)-methyltransferase [EC:2.1.1.187]                           | -                                                                                                                                                                                                                                                                                                                                                                                                                                           |
| DNA | Low | 2.42   | 1.24  | -0.0049 | 0.0484 | 1.95  | K00614 |                                                                                     | -                                                                                                                                                                                                                                                                                                                                                                                                                                           |
| DNA | Low | 5.09   | 1.38  | -0.0068 | 0.0086 | 3.68  | K00687 | penicillin-binding protein 2B [EC:2.3.2.-]                                          | beta-Lactam resistance-Peptidoglycan biosynthesis                                                                                                                                                                                                                                                                                                                                                                                           |
| DNA | Low | 14.23  | 3.45  | -0.0074 | 0.0086 | 4.13  | K00904 | deoxyguanosine kinase [EC:2.7.1.113]                                                | Purine metabolism                                                                                                                                                                                                                                                                                                                                                                                                                           |
| DNA | Low | 31.05  | 12.96 | -0.007  | 0.0086 | 2.4   | K00917 | tagatose 6-phosphate kinase [EC:2.7.1.144]                                          | Galactose metabolism                                                                                                                                                                                                                                                                                                                                                                                                                        |
| DNA | Low | 26.73  | 4.25  | -0.008  | 0.0086 | 6.29  | K01220 | 6-phospho-beta-galactosidase [EC:3.2.1.85]                                          | Galactose metabolism                                                                                                                                                                                                                                                                                                                                                                                                                        |
| DNA | Low | 24.12  | 1.64  | -0.0085 | 0.0086 | 14.73 | K01232 | maltose-6'-phosphate glucosidase [EC:3.2.1.122]                                     | Starch and sucrose metabolism                                                                                                                                                                                                                                                                                                                                                                                                               |
| DNA | Low | 3.36   | 1.48  | -0.0092 | 0.0086 | 2.26  | K01249 | DNA glycosylase [EC:3.2.2.-]                                                        | -                                                                                                                                                                                                                                                                                                                                                                                                                                           |
| DNA | Low | 87.03  | 66.91 | -0.0044 | 0.0453 | 1.3   | K01271 | Xaa-Pro dipeptidase [EC:3.4.13.9]                                                   | -                                                                                                                                                                                                                                                                                                                                                                                                                                           |
| DNA | Low | 28.74  | 14.08 | -0.0101 | 0.0086 | 2.04  | K01420 | CRP/FNR family transcriptional regulator, anaerobic regulatory protein              | -                                                                                                                                                                                                                                                                                                                                                                                                                                           |
| DNA | Low | 9.07   | 2.03  | -0.0048 | 0.0086 | 4.46  | K01444 | N4-(beta-N-acetylglucosaminyl)-L-asparaginase [EC:3.5.1.26]                         | Other glycan degradation-Lysosome                                                                                                                                                                                                                                                                                                                                                                                                           |
| DNA | Low | 5.64   | 1.82  | -0.0142 | 0.0086 | 3.1   | K01455 | formamidase [EC:3.5.1.49]                                                           | Glyoxylate and dicarboxylate metabolism-Nitrogen metabolism-Carbon metabolism                                                                                                                                                                                                                                                                                                                                                               |
| DNA | Low | 19.51  | 8.74  | -0.0086 | 0.0086 | 2.23  | K01632 | fructose-6-phosphate phosphoketolase [EC:4.1.2.22]                                  | Carbon fixation in photosynthetic organisms                                                                                                                                                                                                                                                                                                                                                                                                 |
| DNA | Low | 48.66  | 29.28 | -0.0128 | 0.0408 | 1.66  | K01750 | ornithine cyclodeaminase [EC:4.3.1.12]                                              | Arginine and proline metabolism-Biosynthesis of amino acids                                                                                                                                                                                                                                                                                                                                                                                 |

|     |     |       |       |         |        |       |        |                                                                                    |                                                                                                                                        |
|-----|-----|-------|-------|---------|--------|-------|--------|------------------------------------------------------------------------------------|----------------------------------------------------------------------------------------------------------------------------------------|
| DNA | Low | 21.74 | 11.83 | -0.0088 | 0.0408 | 1.84  | K01788 | N-acylglucosamine-6-phosphate 2-epimerase [EC:5.1.3.9]                             | Amino sugar and nucleotide sugar metabolism                                                                                            |
| DNA | Low | 73.43 | 50.49 | -0.008  | 0.0425 | 1.45  | K02036 | phosphate transport system ATP-binding protein [EC:3.6.3.27]                       | ABC transporters                                                                                                                       |
| DNA | Low | 67.44 | 47.15 | -0.0074 | 0.0425 | 1.43  | K02038 | phosphate transport system permease protein                                        | ABC transporters                                                                                                                       |
| DNA | Low | 12.67 | 6.75  | -0.0054 | 0.0359 | 1.88  | K02047 | sulfate transport system permease protein                                          | Sulfur metabolism-ABC transporters                                                                                                     |
| DNA | Low | 22.51 | 6.95  | -0.0094 | 0.0145 | 3.24  | K02082 | tagatose-6-phosphate ketose/aldose isomerase [EC:5.-.-.-]                          | -                                                                                                                                      |
| DNA | Low | 24.83 | 12.88 | -0.0123 | 0.0086 | 1.93  | K02217 | ferritin [EC:1.16.3.1]                                                             | Porphyrin and chlorophyll metabolism                                                                                                   |
| DNA | Low | 6.56  | 1.15  | -0.0058 | 0.0086 | 5.71  | K02243 | competence protein ComGA                                                           | -                                                                                                                                      |
| DNA | Low | 3.44  | 0.55  | -0.0069 | 0.0086 | 6.27  | K02245 | competence protein ComGC                                                           | -                                                                                                                                      |
| DNA | Low | 2.52  | 0.96  | -0.0055 | 0.0384 | 2.62  | K02430 | DeoR family transcriptional regulator, L-fucose operon activator                   | -                                                                                                                                      |
| DNA | Low | 2.33  | 0.64  | -0.0071 | 0.0086 | 3.64  | K02436 | DeoR family transcriptional regulator, galactitol utilization operon repressor     | -                                                                                                                                      |
| DNA | Low | 0.30  | 0.05  | -0.0152 | 0.0233 | 5.82  | K02511 | MFS transporter, ACS family, 4-hydroxyphenylacetate permease                       | -                                                                                                                                      |
| DNA | Low | 6.73  | 2.31  | -0.0117 | 0.0268 | 2.91  | K02526 | 2-keto-3-deoxygluconate permease                                                   | -                                                                                                                                      |
| DNA | Low | 3.43  | 1.53  | -0.0081 | 0.0086 | 2.24  | K02530 | DeoR family transcriptional regulator, lactose phosphotransferase system repressor | -                                                                                                                                      |
| DNA | Low | 18.90 | 7.81  | -0.0067 | 0.0086 | 2.42  | K02598 | nitrite transporter NirC                                                           | -                                                                                                                                      |
| DNA | Low | 18.69 | 7.54  | -0.0046 | 0.0359 | 2.48  | K02744 | PTS system, N-acetylgalactosamine-specific IIA component [EC:2.7.1.69]             | Galactose metabolism-Phosphotransferase system (PTS)                                                                                   |
| DNA | Low | 8.49  | 0.59  | -0.0072 | 0.0086 | 14.44 | K02745 | PTS system, N-acetylgalactosamine-specific IIB component [EC:2.7.1.69]             | Galactose metabolism-Phosphotransferase system (PTS)                                                                                   |
| DNA | Low | 10.24 | 0.77  | -0.0079 | 0.0086 | 13.32 | K02746 | PTS system, N-acetylgalactosamine-specific IIC component                           | Galactose metabolism-Phosphotransferase system (PTS)                                                                                   |
| DNA | Low | 12.13 | 0.85  | -0.0079 | 0.0086 | 14.33 | K02747 | PTS system, N-acetylgalactosamine-specific IID component                           | Galactose metabolism-Phosphotransferase system (PTS)                                                                                   |
| DNA | Low | 14.61 | 2.96  | -0.0102 | 0.0086 | 4.94  | K02759 | PTS system, cellobiose-specific IIA component [EC:2.7.1.69]                        | Phosphotransferase system (PTS)                                                                                                        |
| DNA | Low | 34.88 | 6.18  | -0.0074 | 0.0086 | 5.64  | K02760 | PTS system, cellobiose-specific IIB component [EC:2.7.1.69]                        | Phosphotransferase system (PTS)                                                                                                        |
| DNA | Low | 97.79 | 27.78 | -0.008  | 0.0145 | 3.52  | K02761 | PTS system, cellobiose-specific IIC component                                      | Phosphotransferase system (PTS)                                                                                                        |
| DNA | Low | 7.48  | 1.5   | -0.0088 | 0.033  | 4.98  | K02769 | PTS system, fructose-specific IIB component [EC:2.7.1.69]                          | Fructose and mannose metabolism-Phosphotransferase system (PTS)                                                                        |
| DNA | Low | 13.39 | 1.44  | -0.0072 | 0.0145 | 9.31  | K02770 | PTS system, fructose-specific IIC component                                        | Fructose and mannose metabolism-Phosphotransferase system (PTS)                                                                        |
| DNA | Low | 28.9  | 7.75  | -0.0064 | 0.0086 | 3.73  | K02777 | PTS system, glucose-specific IIA component [EC:2.7.1.69]                           | Glycolysis / Gluconeogenesis-Starch and sucrose metabolism-Amino sugar and nucleotide sugar metabolism-Phosphotransferase system (PTS) |
| DNA | Low | 19.69 | 2.96  | -0.0067 | 0.0086 | 6.66  | K02778 | PTS system, glucose-specific IIB component [EC:2.7.1.69]                           | Glycolysis / Gluconeogenesis-Amino sugar and nucleotide sugar metabolism-Phosphotransferase system (PTS)                               |
| DNA | Low | 5.64  | 0.92  | -0.0076 | 0.0086 | 6.14  | K02786 | PTS system, lactose-specific IIA component [EC:2.7.1.69]                           | Galactose metabolism-Phosphotransferase system (PTS)                                                                                   |
| DNA | Low | 29.33 | 4.7   | -0.008  | 0.0086 | 6.24  | K02787 | PTS system, lactose-specific IIB component [EC:2.7.1.69]                           | Galactose metabolism-Phosphotransferase system (PTS)                                                                                   |

|     |     |        |        |         |        |      |        |                                                                                    |                                                                              |
|-----|-----|--------|--------|---------|--------|------|--------|------------------------------------------------------------------------------------|------------------------------------------------------------------------------|
| DNA | Low | 0.16   | 0.04   | -0.0116 | 0.0408 | 3.85 | K02815 | PTS system, sorbose-specific IID component                                         | Fructose and mannose metabolism-Phosphotransferase system (PTS)              |
| DNA | Low | 2.72   | 0.95   | -0.0098 | 0.0268 | 2.87 | K03189 | urease accessory protein                                                           | -                                                                            |
| DNA | Low | 37.88  | 15.12  | -0.0089 | 0.0086 | 2.5  | K03311 | branched-chain amino acid:cation transporter, LIVCS family                         | -                                                                            |
| DNA | Low | 29.81  | 10.27  | -0.0099 | 0.019  | 2.9  | K03325 | arsenite transporter, ACR3 family                                                  | -                                                                            |
| DNA | Low | 0.45   | 0.15   | -0.0117 | 0.0268 | 2.99 | K03445 | MFS transporter, DHA1 family, purine ribonucleoside efflux pump                    | -                                                                            |
| DNA | Low | 15.24  | 5.91   | -0.0052 | 0.0359 | 2.58 | K03478 | hypothetical protein                                                               | -                                                                            |
| DNA | Low | 11.35  | 2.32   | -0.0088 | 0.0086 | 4.89 | K03481 | RpiR family transcriptional regulator, glv operon transcriptional regulator        | -                                                                            |
| DNA | Low | 21.25  | 8.36   | -0.0108 | 0.0384 | 2.54 | K03488 | beta-glucoside operon transcriptional antiterminator                               | -                                                                            |
| DNA | Low | 12.54  | 2.11   | -0.009  | 0.0086 | 5.95 | K03492 | GntR family transcriptional regulator                                              | -                                                                            |
| DNA | Low | 2.10   | 0.51   | -0.0071 | 0.0145 | 4.14 | K03647 | protein involved in ribonucleotide reduction                                       | -                                                                            |
| DNA | Low | 33.98  | 21.44  | -0.004  | 0.0425 | 1.58 | K03712 | MarR family transcriptional regulator, multiple antibiotic resistance protein MarR | -                                                                            |
| DNA | Low | 9.03   | 3.76   | -0.0082 | 0.019  | 2.4  | K03741 | arsenate reductase [EC:1.20.4.1]                                                   | -                                                                            |
| DNA | Low | 2.83   | 0.4    | -0.0078 | 0.0086 | 7.12 | K04047 | starvation-inducible DNA-binding protein                                           | -                                                                            |
| DNA | Low | 5.57   | 1.94   | -0.0051 | 0.033  | 2.86 | K05299 | formate dehydrogenase alpha subunit [EC:1.2.1.43]                                  | Methane metabolism-Carbon fixation pathways in prokaryotes-Carbon metabolism |
| DNA | Low | 10.86  | 6.26   | -0.0071 | 0.0086 | 1.73 | K05337 | ferredoxin                                                                         | -                                                                            |
| DNA | Low | 2.51   | 0.64   | -0.0064 | 0.0086 | 3.93 | K05362 | UDP-N-acetylmuramoyl-L-alanyl-D-glutamate-L-lysine ligase [EC:6.3.2.7]             | Peptidoglycan biosynthesis                                                   |
| DNA | Low | 0.43   | 0.08   | -0.0071 | 0.0145 | 5.24 | K05522 | endonuclease VIII [EC:3.2.2.- 4.2.99.18]                                           | Base excision repair                                                         |
| DNA | Low | 0.93   | 0.16   | -0.0063 | 0.0086 | 5.83 | K05556 | ketoreductase RED1 [EC:1.1.1.-]                                                    | Biosynthesis of type II polyketide products                                  |
| DNA | Low | 16.72  | 5.66   | -0.0046 | 0.0145 | 2.95 | K05820 | MFS transporter, PPP family, 3-phenylpropionic acid transporter                    | -                                                                            |
| DNA | Low | 3.57   | 1.74   | -0.0072 | 0.0268 | 2.05 | K05823 | N-acetyldiaminopimelate deacetylase [EC:3.5.1.47]                                  | Lysine biosynthesis-Biosynthesis of amino acids                              |
| DNA | Low | 28.56  | 6.39   | -0.0077 | 0.0145 | 4.47 | K05845 | osmoprotectant transport system substrate-binding protein                          | ABC transporters                                                             |
| DNA | Low | 17.58  | 6.83   | -0.0061 | 0.0233 | 2.57 | K05847 | osmoprotectant transport system ATP-binding protein                                | ABC transporters                                                             |
| DNA | Low | 1.29   | 0.38   | -0.0085 | 0.0086 | 3.43 | K05894 | 12-oxophytodienoic acid reductase [EC:1.3.1.42]                                    | alpha-Linolenic acid metabolism                                              |
| DNA | Low | 4.19   | 0.34   | -0.0092 | 0.0086 | 12.2 | K05915 |                                                                                    | Bisphenol degradation-Naphthalene degradation                                |
| DNA | Low | 20.29  | 12.59  | -0.0102 | 0.033  | 1.61 | K06199 | CrcB protein                                                                       | -                                                                            |
| DNA | Low | 5.89   | 2.77   | -0.0081 | 0.0086 | 2.13 | K06286 | septation ring formation regulator                                                 | -                                                                            |
| DNA | Low | 2.76   | 0.32   | -0.0053 | 0.0086 | 8.61 | K06929 |                                                                                    | -                                                                            |
| DNA | Low | 28.73  | 13.99  | -0.0058 | 0.0268 | 2.05 | K06956 |                                                                                    | -                                                                            |
| DNA | Low | 13.42  | 2.14   | -0.0083 | 0.0086 | 6.27 | K07396 | putative protein-disulfide isomerase                                               | -                                                                            |
| DNA | Low | 21.92  | 13.76  | -0.0097 | 0.0408 | 1.59 | K07483 | transposase                                                                        | -                                                                            |
| DNA | Low | 629.65 | 328.36 | -0.006  | 0.0359 | 1.92 | K07496 | putative transposase                                                               | -                                                                            |
| DNA | Low | 463.63 | 367.06 | -0.0179 | 0.0086 | 1.26 | K07497 | putative transposase                                                               | -                                                                            |
| DNA | Low | 0.54   | 0.19   | -0.0069 | 0.0425 | 2.82 | K07542 | phosphatidylinositol glycan, class V [EC:2.4.1.-]                                  | Glycosylphosphatidylinositol(GPI)-anchor biosynthesis                        |

|     |     |       |       |         |        |       |        |                                                                                                                      |                                                   |
|-----|-----|-------|-------|---------|--------|-------|--------|----------------------------------------------------------------------------------------------------------------------|---------------------------------------------------|
| DNA | Low | 6.81  | 3.46  | -0.0062 | 0.033  | 1.97  | K07570 | general stress protein 13                                                                                            | -                                                 |
| DNA | Low | 1.26  | 0.2   | -0.006  | 0.0086 | 6.19  | K07757 | sugar-phosphatase [EC:3.1.3.23]                                                                                      | -                                                 |
| DNA | Low | 20.81 | 9.01  | -0.0066 | 0.0425 | 2.31  | K07770 | two-component system, OmpR family, response regulator CssR                                                           | Two-component system                              |
| DNA | Low | 5.09  | 1.55  | -0.0068 | 0.0268 | 3.3   | K08153 | MFS transporter, DHA1 family, multidrug resistance protein                                                           | -                                                 |
| DNA | Low | 5.31  | 0.99  | -0.0099 | 0.0086 | 5.35  | K08159 | MFS transporter, DHA1 family, L-arabinose/isopropyl-beta-D-thiogalactopyranoside export protein                      | -                                                 |
| DNA | Low | 28.35 | 7.8   | -0.0085 | 0.0086 | 3.63  | K09155 | hypothetical protein                                                                                                 | -                                                 |
| DNA | Low | 12.71 | 3.24  | -0.0063 | 0.0086 | 3.93  | K09693 | teichoic acid transport system ATP-binding protein [EC:3.6.3.40]                                                     | ABC transporters                                  |
| DNA | Low | 1.32  | 0.09  | -0.007  | 0.0086 | 14.05 | K09813 | hemin transport system permease protein                                                                              | ABC transporters                                  |
| DNA | Low | 24.58 | 9.3   | -0.012  | 0.0086 | 2.64  | K09825 | Fur family transcriptional regulator, peroxide stress response regulator                                             | -                                                 |
| DNA | Low | 36.91 | 11.22 | -0.009  | 0.0233 | 3.29  | K09963 | hypothetical protein                                                                                                 | -                                                 |
| DNA | Low | 7.87  | 3.19  | -0.0079 | 0.0086 | 2.46  | K09972 | general L-amino acid transport system ATP-binding protein [EC:3.6.3.-]                                               | ABC transporters                                  |
| DNA | Low | 0.51  | 0.13  | -0.0068 | 0.0086 | 3.83  | K09996 | arginine transport system substrate-binding protein                                                                  | ABC transporters                                  |
| DNA | Low | 14.88 | 2.33  | -0.0072 | 0.0086 | 6.38  | K10120 | fructooligosaccharide transport system substrate-binding protein                                                     | -                                                 |
| DNA | Low | 12.30 | 2.84  | -0.0071 | 0.0086 | 4.33  | K10121 | fructooligosaccharide transport system permease protein                                                              | -                                                 |
| DNA | Low | 10.11 | 1.07  | -0.0069 | 0.0086 | 9.44  | K10122 | fructooligosaccharide transport system permease protein                                                              | -                                                 |
| DNA | Low | 24.45 | 2.16  | -0.0066 | 0.0086 | 11.31 | K10254 | myosin-crossreactive antigen                                                                                         | -                                                 |
| DNA | Low | 0.47  | 0.1   | -0.0088 | 0.019  | 4.57  | K10815 | hydrogen cyanide synthase HcnB [EC:1.4.99.5]                                                                         | Cyanoamino acid metabolism                        |
| DNA | Low | 1.11  | 0.26  | -0.0097 | 0.0086 | 4.25  | K11202 | PTS system, fructose-specific IIB-like component [EC:2.7.1.69]                                                       | -                                                 |
| DNA | Low | 6.90  | 3.39  | -0.0059 | 0.0086 | 2.04  | K11630 | two-component system, OmpR family, bacitracin resistance response regulator BceR                                     | Two-component system                              |
| DNA | Low | 1.02  | 0.11  | -0.0079 | 0.019  | 9.15  | K11633 | two-component system, OmpR family, sensor histidine kinase YxdK [EC:2.7.13.3]                                        | Two-component system                              |
| DNA | Low | 1.20  | 0.6   | -0.0091 | 0.0359 | 2     | K11892 | type VI secretion system protein ImpK                                                                                | Bacterial secretion system                        |
| DNA | Low | 6.23  | 1.6   | -0.0084 | 0.0268 | 3.89  | K12268 | accessory secretory protein Asp1                                                                                     | -                                                 |
| DNA | Low | 7.55  | 2.21  | -0.0085 | 0.0268 | 3.41  | K12269 | accessory secretory protein Asp2                                                                                     | -                                                 |
| DNA | Low | 1.48  | 0.48  | -0.0079 | 0.0268 | 3.05  | K12270 | accessory secretory protein Asp3                                                                                     | -                                                 |
| DNA | Low | 0.05  | 0.01  | -0.0088 | 0.0086 | 7.06  | K12301 | MFS transporter, ACS family, solute carrier family 17 (sodium-dependent inorganic phosphate cotransporter), member 5 | Lysosome                                          |
| DNA | Low | 3.48  | 0.46  | -0.0061 | 0.0086 | 7.55  | K12556 | penicillin-binding protein 2X [EC:2.3.2.-]                                                                           | beta-Lactam resistance-Peptidoglycan biosynthesis |
| DNA | Low | 7.13  | 1.5   | -0.0135 | 0.0484 | 4.75  | K13021 | MFS transporter, ACS family, tartrate transporter                                                                    | -                                                 |
| DNA | Low | 2.04  | 0.88  | -0.0063 | 0.0384 | 2.33  | K13403 | methylenetetrahydrofolate dehydrogenase(NAD+) / 5,10-                                                                | One carbon pool by folate                         |

|     |      |        |        |         |        |       |        |                                                                                                       |                                                                                                                                                                                                                                                                                                                                                                                                                                                               |
|-----|------|--------|--------|---------|--------|-------|--------|-------------------------------------------------------------------------------------------------------|---------------------------------------------------------------------------------------------------------------------------------------------------------------------------------------------------------------------------------------------------------------------------------------------------------------------------------------------------------------------------------------------------------------------------------------------------------------|
|     |      |        |        |         |        |       |        | methenyltetrahydrofolate cyclohydrolase [EC:1.5.1.15 3.5.4.9]                                         |                                                                                                                                                                                                                                                                                                                                                                                                                                                               |
| DNA | Low  | 0.63   | 0.15   | -0.0068 | 0.0086 | 4.12  | K13639 | MerR family transcriptional regulator, redox-sensitive transcriptional activator SoxR                 | -                                                                                                                                                                                                                                                                                                                                                                                                                                                             |
| DNA | Low  | 5.93   | 1.53   | -0.0112 | 0.0233 | 3.87  | K13727 | phenolic acid decarboxylase [EC:4.1.1.-]                                                              | -                                                                                                                                                                                                                                                                                                                                                                                                                                                             |
| DNA | Low  | 0.19   | 0.01   | -0.0061 | 0.0145 | 18.94 | K13732 | fibronectin-binding protein A                                                                         | Bacterial invasion of epithelial cells                                                                                                                                                                                                                                                                                                                                                                                                                        |
| DNA | Low  | 13.99  | 9.9    | -0.0077 | 0.0233 | 1.41  | K13770 | TetR/AcrR family transcriptional regulator, fatty acid metabolism regulator protein                   | -                                                                                                                                                                                                                                                                                                                                                                                                                                                             |
| DNA | Low  | 330.85 | 281.8  | -0.0107 | 0.033  | 1.17  | K14155 | cystathione beta-lyase [EC:4.4.1.8]                                                                   | Cysteine and methionine metabolism-Selenocompound metabolism-Biosynthesis of amino acids                                                                                                                                                                                                                                                                                                                                                                      |
| DNA | Low  | 0.15   | 0.06   | -0.0093 | 0.0453 | 2.74  | K14286 | ethanolamine-phosphate phospho-lyase [EC:4.2.3.2]                                                     | Glycerophospholipid metabolism                                                                                                                                                                                                                                                                                                                                                                                                                                |
| DNA | Low  | 0.07   | 0.01   | -0.0101 | 0.033  | 8.72  | K14309 | nuclear pore complex protein Nup93                                                                    | RNA transport                                                                                                                                                                                                                                                                                                                                                                                                                                                 |
| DNA | Low  | 2.20   | 0.57   | -0.0057 | 0.0086 | 3.84  | K15016 | enoyl-CoA hydratase / 3-hydroxyacyl-CoA dehydrogenase [EC:4.2.1.17 1.1.1.35]                          | Carbon fixation pathways in prokaryotes-Carbon metabolism                                                                                                                                                                                                                                                                                                                                                                                                     |
| DNA | Low  | 0.34   | 0.06   | -0.0045 | 0.0086 | 5.88  | K15054 | (S)-mandelate dehydrogenase [EC:1.1.99.31]                                                            | Aminobenzoate degradation                                                                                                                                                                                                                                                                                                                                                                                                                                     |
| RNA | High | 0.02   | 0.14   | 0.0259  | 0.0212 | 5.82  | K00323 | NAD(P) transhydrogenase [EC:1.6.1.2]                                                                  | Nicotinate and nicotinamide metabolism                                                                                                                                                                                                                                                                                                                                                                                                                        |
| RNA | High | 45.15  | 121.23 | 0.0122  | 0.0067 | 2.68  | K00399 | methyl-coenzyme M reductase alpha subunit [EC:2.8.4.1]                                                | Methane metabolism-Carbon metabolism                                                                                                                                                                                                                                                                                                                                                                                                                          |
| RNA | High | 29.13  | 89.94  | 0.0134  | 0.0067 | 3.09  | K00401 | methyl-coenzyme M reductase beta subunit [EC:2.8.4.1]                                                 | Methane metabolism-Carbon metabolism                                                                                                                                                                                                                                                                                                                                                                                                                          |
| RNA | High | 2.15   | 4.77   | 0.0287  | 0.0252 | 2.21  | K00814 | alanine transaminase [EC:2.6.1.2]                                                                     | Alanine, aspartate and glutamate metabolism-Carbon fixation in photosynthetic organisms-Carbon metabolism-2-Oxocarboxylic acid metabolism-Biosynthesis of amino acids                                                                                                                                                                                                                                                                                         |
| RNA | High | 0.12   | 0.52   | 0.0291  | 0.0067 | 4.38  | K01479 | formiminoglutamase [EC:3.5.3.8]                                                                       | Histidine metabolism                                                                                                                                                                                                                                                                                                                                                                                                                                          |
| RNA | High | 0.32   | 1.15   | 0.022   | 0.0067 | 3.56  | K02319 | DNA polymerase I [EC:2.7.7.7]                                                                         | Purine metabolism-Pyrimidine metabolism                                                                                                                                                                                                                                                                                                                                                                                                                       |
| RNA | High | 0.16   | 0.49   | 0.0226  | 0.0067 | 3.07  | K02683 | DNA primase [EC:2.7.7.-]                                                                              | -                                                                                                                                                                                                                                                                                                                                                                                                                                                             |
| RNA | High | 0.70   | 3.21   | 0.0154  | 0.0326 | 4.61  | K03045 | DNA-directed RNA polymerase subunit B'' [EC:2.7.7.6]                                                  | Purine metabolism-Pyrimidine metabolism-RNA polymerase                                                                                                                                                                                                                                                                                                                                                                                                        |
| RNA | High | 0.18   | 0.85   | 0.0252  | 0.0067 | 4.66  | K03053 | DNA-directed RNA polymerase subunit H [EC:2.7.7.6]                                                    | Purine metabolism-Pyrimidine metabolism-RNA polymerase                                                                                                                                                                                                                                                                                                                                                                                                        |
| RNA | High | 1.02   | 4.4    | 0.0236  | 0.0297 | 4.3   | K03124 | transcription initiation factor TFIIB                                                                 | Basal transcription factors-Epstein-Barr virus infection-Viral carcinogenesis                                                                                                                                                                                                                                                                                                                                                                                 |
| RNA | High | 0.98   | 2.65   | 0.0136  | 0.0191 | 2.71  | K03167 | DNA topoisomerase VI subunit B [EC:5.99.1.3]                                                          | -                                                                                                                                                                                                                                                                                                                                                                                                                                                             |
| RNA | High | 0.18   | 0.62   | 0.0295  | 0.0429 | 3.41  | K03226 | type III secretion protein SctR                                                                       | Bacterial secretion system                                                                                                                                                                                                                                                                                                                                                                                                                                    |
| RNA | High | 0.07   | 0.33   | 0.0169  | 0.0364 | 4.47  | K04795 | fibrillar-like pre-rRNA processing protein                                                            | -                                                                                                                                                                                                                                                                                                                                                                                                                                                             |
| RNA | High | 0.29   | 0.98   | 0.0179  | 0.0067 | 3.41  | K04801 | replication factor C small subunit                                                                    | -                                                                                                                                                                                                                                                                                                                                                                                                                                                             |
| RNA | High | 0.00   | 0.04   | 0.0337  | 0.0191 | 14.93 | K04857 | voltage-dependent calcium channel L type alpha-1S                                                     | MAPK signaling pathway-Calcium signaling pathway-Cardiac muscle contraction-Adrenergic signaling in cardiomyocytes-Vascular smooth muscle contraction-Retrograde endocannabinoid signaling-Cholinergic synapse-Serotonergic synapse-GABAergic synapse-Insulin secretion-GnRH signaling pathway-Oxytocin signaling pathway-Alzheimer's disease-Hypertrophic cardiomyopathy (HCM)-Arrhythmogenic right ventricular cardiomyopathy (ARVC)-Dilated cardiomyopathy |
| RNA | High | 2.59   | 6.43   | 0.0102  | 0.0067 | 2.49  | K06863 | 5-formaminoimidazole-4-carboxamide-1-(beta)-D-ribofuranosyl 5'-monophosphate synthetase [EC:6.3.4.23] | Purine metabolism                                                                                                                                                                                                                                                                                                                                                                                                                                             |

|     |      |        |        |         |        |       |        |                                                                                                                    |                                                                                                                                                                                |
|-----|------|--------|--------|---------|--------|-------|--------|--------------------------------------------------------------------------------------------------------------------|--------------------------------------------------------------------------------------------------------------------------------------------------------------------------------|
| RNA | High | 28.38  | 53.21  | 0.0279  | 0.0285 | 1.87  | K06907 | Phage tail sheath protein FI                                                                                       | -                                                                                                                                                                              |
| RNA | High | 0.02   | 0.21   | 0.0219  | 0.0212 | 10.7  | K06913 | -                                                                                                                  | -                                                                                                                                                                              |
| RNA | High | 0.09   | 0.78   | 0.017   | 0.0067 | 9.01  | K06927 | diphthine-ammonia ligase [EC:6.3.1.14]                                                                             | -                                                                                                                                                                              |
| RNA | High | 0.63   | 2.02   | 0.0204  | 0.0191 | 3.22  | K07041 | -                                                                                                                  | -                                                                                                                                                                              |
| RNA | High | 0.07   | 0.35   | 0.0212  | 0.0067 | 4.88  | K07135 | -                                                                                                                  | -                                                                                                                                                                              |
| RNA | High | 0.13   | 0.47   | 0.0168  | 0.0364 | 3.65  | K07142 | -                                                                                                                  | -                                                                                                                                                                              |
| RNA | High | 1.25   | 2.27   | 0.0312  | 0.0494 | 1.82  | K07318 | adenine-specific DNA-methyltransferase [EC:2.1.1.72]                                                               | -                                                                                                                                                                              |
| RNA | High | 0.85   | 1.93   | 0.0167  | 0.0212 | 2.27  | K07463 | archaea-specific RecJ-like exonuclease                                                                             | -                                                                                                                                                                              |
| RNA | High | 0.19   | 0.76   | 0.0106  | 0.0067 | 3.9   | K07558 | tRNA nucleotidyltransferase (CCA-adding enzyme) [EC:2.7.7.72]                                                      | -                                                                                                                                                                              |
| RNA | High | 0.13   | 0.7    | 0.0189  | 0.0212 | 5.26  | K07569 | RNA-binding protein                                                                                                | -                                                                                                                                                                              |
| RNA | High | 0.44   | 1.36   | 0.0215  | 0.0067 | 3.08  | K07582 | -                                                                                                                  | -                                                                                                                                                                              |
| RNA | High | 0.03   | 0.21   | 0.0262  | 0.0252 | 7.42  | K07732 | riboflavin kinase, archaea type [EC:2.7.1.161]                                                                     | Riboflavin metabolism                                                                                                                                                          |
| RNA | High | 0.71   | 3.19   | 0.0202  | 0.0067 | 4.52  | K09482 | glutamyl-tRNA(Gln) amidotransferase subunit D [EC:6.3.5.7]                                                         | Aminoacyl-tRNA biosynthesis                                                                                                                                                    |
| RNA | High | 2.70   | 5.23   | 0.0191  | 0.0067 | 1.93  | K09935 | hypothetical protein                                                                                               | -                                                                                                                                                                              |
| RNA | High | 0.48   | 1.9    | 0.0165  | 0.0067 | 3.97  | K10725 | archaeal cell division control protein 6                                                                           | -                                                                                                                                                                              |
| RNA | High | 0.34   | 1.17   | 0.0223  | 0.0126 | 3.42  | K10896 | fanconi anemia group M protein                                                                                     | Fanconi anemia pathway                                                                                                                                                         |
| RNA | High | 0.02   | 0.09   | 0.0266  | 0.0438 | 5.79  | K11404 | histone deacetylase 3 [EC:3.5.1.98]                                                                                | Thyroid hormone signaling pathway-Alcoholism-Viral carcinogenesis                                                                                                              |
| RNA | High | 0.01   | 0.13   | 0.0239  | 0.0191 | 12.66 | K12739 | peptidyl-prolyl cis-trans isomerase-like 6 [EC:5.2.1.8]                                                            | -                                                                                                                                                                              |
| RNA | High | 0.07   | 0.36   | 0.0289  | 0.0067 | 5.03  | K13886 | coronin-1B                                                                                                         | -                                                                                                                                                                              |
| RNA | High | 0.02   | 0.13   | 0.0239  | 0.0297 | 5.23  | K14995 | solute carrier family 38 (sodium-coupled neutral amino acid transporter), member 9                                 | -                                                                                                                                                                              |
| RNA | Low  | 2.72   | 0.93   | -0.0158 | 0.0326 | 2.91  | K00004 | (R,R)-butanediol dehydrogenase / meso-butanediol dehydrogenase / diacetyl reductase [EC:1.1.1.4 1.1.1.- 1.1.1.303] | Butanoate metabolism                                                                                                                                                           |
| RNA | Low  | 324.93 | 139.22 | -0.024  | 0.0067 | 2.33  | K00074 | 3-hydroxybutyryl-CoA dehydrogenase [EC:1.1.1.157]                                                                  | Phenylalanine metabolism-Benzoate degradation-Butanoate metabolism                                                                                                             |
| RNA | Low  | 528.65 | 408.92 | -0.0276 | 0.0164 | 1.29  | K00100 | Oxidoreductase                                                                                                     | Fructose and mannose metabolism-Bisphenol degradation-Linoleic acid metabolism-Chloroalkane and chloroalkene degradation-Butanoate metabolism                                  |
| RNA | Low  | 172.02 | 58.11  | -0.025  | 0.0067 | 2.96  | K00104 | glycolate oxidase [EC:1.1.3.15]                                                                                    | Glyoxylate and dicarboxylate metabolism                                                                                                                                        |
| RNA | Low  | 24.88  | 4.44   | -0.0143 | 0.0067 | 5.6   | K00158 | pyruvate oxidase [EC:1.2.3.3]                                                                                      | Pyruvate metabolism                                                                                                                                                            |
| RNA | Low  | 16.77  | 6.55   | -0.0211 | 0.0067 | 2.56  | K00194 | acetyl-CoA decarboxylase/synthase complex subunit delta [EC:2.1.1.245]                                             | Methane metabolism-Carbon fixation pathways in prokaryotes-Carbon metabolism                                                                                                   |
| RNA | Low  | 23.86  | 9.93   | -0.022  | 0.0067 | 2.4   | K00197 | acetyl-CoA decarboxylase/synthase complex subunit gamma [EC:2.1.1.245]                                             | Methane metabolism-Carbon fixation pathways in prokaryotes-Carbon metabolism                                                                                                   |
| RNA | Low  | 43.30  | 17.71  | -0.0147 | 0.0067 | 2.44  | K00198 | carbon-monoxide dehydrogenase catalytic subunit [EC:1.2.99.2 1.2.7.4]                                              | Nitrotoluene degradation-Methane metabolism-Carbon fixation pathways in prokaryotes-Carbon metabolism                                                                          |
| RNA | Low  | 347.43 | 179.21 | -0.0117 | 0.0374 | 1.94  | K00248 | butyryl-CoA dehydrogenase [EC:1.3.8.1]                                                                             | Fatty acid degradation-Valine, leucine and isoleucine degradation-Butanoate metabolism-Carbon metabolism-Fatty acid metabolism                                                 |
| RNA | Low  | 23.31  | 10.1   | -0.0239 | 0.0067 | 2.31  | K00249 | acyl-CoA dehydrogenase [EC:1.3.8.7]                                                                                | Fatty acid degradation-Valine, leucine and isoleucine degradation-beta-Alanine metabolism-Propanoate metabolism-Carbon metabolism-Fatty acid metabolism-PPAR signaling pathway |



|     |     |        |        |         |        |       |        |                                                                               |                                                                                                                                                                                                                                                                                                                                                                                                                        |
|-----|-----|--------|--------|---------|--------|-------|--------|-------------------------------------------------------------------------------|------------------------------------------------------------------------------------------------------------------------------------------------------------------------------------------------------------------------------------------------------------------------------------------------------------------------------------------------------------------------------------------------------------------------|
| RNA | Low | 85.50  | 57.63  | -0.0135 | 0.0164 | 1.48  | K00286 | pyrroline-5-carboxylate reductase [EC:1.5.1.2]                                | Arginine and proline metabolism-Biosynthesis of amino acids                                                                                                                                                                                                                                                                                                                                                            |
| RNA | Low | 14.59  | 6.76   | -0.0131 | 0.0191 | 2.16  | K00375 | GntR family transcriptional regulator / MocR family aminotransferase          | -                                                                                                                                                                                                                                                                                                                                                                                                                      |
| RNA | Low | 47.17  | 14.81  | -0.0186 | 0.0067 | 3.18  | K00385 | anaerobic sulfite reductase subunit C                                         | Sulfur metabolism                                                                                                                                                                                                                                                                                                                                                                                                      |
| RNA | Low | 168.04 | 110.66 | -0.0148 | 0.0381 | 1.52  | K00528 | ferredoxin--NADP+ reductase [EC:1.18.1.2]                                     | -                                                                                                                                                                                                                                                                                                                                                                                                                      |
| RNA | Low | 216.09 | 176.8  | -0.0164 | 0.0067 | 1.22  | K00540 | Oxidoreductase                                                                | -                                                                                                                                                                                                                                                                                                                                                                                                                      |
| RNA | Low | 6.71   | 2.93   | -0.0092 | 0.0126 | 2.29  | K00547 | homocysteine S-methyltransferase [EC:2.1.1.10]                                | Cysteine and methionine metabolism                                                                                                                                                                                                                                                                                                                                                                                     |
| RNA | Low | 173.29 | 127.1  | -0.0176 | 0.0067 | 1.36  | K00609 | aspartate carbamoyltransferase catalytic subunit [EC:2.1.3.2]                 | Pyrimidine metabolism-Alanine, aspartate and glutamate metabolism                                                                                                                                                                                                                                                                                                                                                      |
| RNA | Low | 461.33 | 145.59 | -0.018  | 0.0191 | 3.17  | K00626 | acetyl-CoA C-acetyltransferase [EC:2.3.1.9]                                   | Fatty acid degradation-Synthesis and degradation of ketone bodies-Valine, leucine and isoleucine degradation-Lysine degradation-Benzoate degradation-Tryptophan metabolism-Pyruvate metabolism-Glyoxylate and dicarboxylate metabolism-Propanoate metabolism-Butanoate metabolism-Carbon fixation pathways in prokaryotes-Terpenoid backbone biosynthesis-Carbon metabolism-Fatty acid metabolism-Two-component system |
| RNA | Low | 6.07   | 1.75   | -0.0212 | 0.0374 | 3.48  | K00632 | acetyl-CoA acyltransferase [EC:2.3.1.16]                                      | Fatty acid degradation-Valine, leucine and isoleucine degradation-Geraniol degradation-Benzoate degradation-alpha-Linolenic acid metabolism-Ethylbenzene degradation-Fatty acid metabolism                                                                                                                                                                                                                             |
| RNA | Low | 12.50  | 6.18   | -0.016  | 0.0067 | 2.02  | K00674 | 2,3,4,5-tetrahydropyridine-2-carboxylate N-succinyltransferase [EC:2.3.1.117] | Lysine biosynthesis-Biosynthesis of amino acids                                                                                                                                                                                                                                                                                                                                                                        |
| RNA | Low | 4.28   | 2.14   | -0.0219 | 0.0067 | 2     | K00842 | aminotransferase [EC:2.6.1.-]                                                 | -                                                                                                                                                                                                                                                                                                                                                                                                                      |
| RNA | Low | 0.54   | 0.1    | -0.0147 | 0.0212 | 5.65  | K00883 | 2-dehydro-3-deoxygalactonokinase [EC:2.7.1.58]                                | Galactose metabolism                                                                                                                                                                                                                                                                                                                                                                                                   |
| RNA | Low | 6.96   | 3.58   | -0.0174 | 0.0438 | 1.94  | K00901 | diacylglycerol kinase (ATP dependent) [EC:2.7.1.107]                          | Glycerolipid metabolism-Glycerophospholipid metabolism-Phosphatidylinositol signaling system                                                                                                                                                                                                                                                                                                                           |
| RNA | Low | 40.32  | 16.44  | -0.0146 | 0.0326 | 2.45  | K01026 | propionate CoA-transferase [EC:2.8.3.1]                                       | Pyruvate metabolism-Propanoate metabolism-Styrene degradation                                                                                                                                                                                                                                                                                                                                                          |
| RNA | Low | 4.46   | 2.37   | -0.0192 | 0.0212 | 1.88  | K01076 | Thioester hydrolase                                                           | Limonene and pinene degradation-Biosynthesis of unsaturated fatty acids                                                                                                                                                                                                                                                                                                                                                |
| RNA | Low | 2.08   | 0.32   | -0.0151 | 0.0067 | 6.4   | K01220 | 6-phospho-beta-galactosidase [EC:3.2.1.85]                                    | Galactose metabolism                                                                                                                                                                                                                                                                                                                                                                                                   |
| RNA | Low | 1.71   | 0.22   | -0.0188 | 0.0067 | 7.7   | K01232 | maltose-6'-phosphate glucosidase [EC:3.2.1.122]                               | Starch and sucrose metabolism                                                                                                                                                                                                                                                                                                                                                                                          |
| RNA | Low | 46.56  | 10.51  | -0.0164 | 0.0067 | 4.43  | K01442 | choloylglycine hydrolase [EC:3.5.1.24]                                        | Primary bile acid biosynthesis-Secondary bile acid biosynthesis                                                                                                                                                                                                                                                                                                                                                        |
| RNA | Low | 57.79  | 29.93  | -0.0191 | 0.0067 | 1.93  | K01443 | N-acetylglucosamine-6-phosphate deacetylase [EC:3.5.1.25]                     | Amino sugar and nucleotide sugar metabolism                                                                                                                                                                                                                                                                                                                                                                            |
| RNA | Low | 12.80  | 6.76   | -0.0153 | 0.0212 | 1.89  | K01451 | hippurate hydrolase [EC:3.5.1.32]                                             | Phenylalanine metabolism                                                                                                                                                                                                                                                                                                                                                                                               |
| RNA | Low | 3.20   | 1.44   | -0.0239 | 0.0067 | 2.23  | K01455 | formamidase [EC:3.5.1.49]                                                     | Glyoxylate and dicarboxylate metabolism-Nitrogen metabolism-Carbon metabolism                                                                                                                                                                                                                                                                                                                                          |
| RNA | Low | 5.47   | 2.4    | -0.0213 | 0.0067 | 2.28  | K01501 | nitrilase [EC:3.5.5.1]                                                        | Tryptophan metabolism-Cyanoamino acid metabolism-Aminobenzoate degradation-Styrene degradation-Nitrogen metabolism                                                                                                                                                                                                                                                                                                     |
| RNA | Low | 2.53   | 0.09   | -0.0271 | 0.0191 | 27.35 | K01577 | oxalyl-CoA decarboxylase [EC:4.1.1.8]                                         | Glyoxylate and dicarboxylate metabolism                                                                                                                                                                                                                                                                                                                                                                                |
| RNA | Low | 198.49 | 132.57 | -0.0158 | 0.0394 | 1.5   | K01615 | glutaconyl-CoA decarboxylase [EC:4.1.1.70]                                    | Benzoate degradation-Butanoate metabolism                                                                                                                                                                                                                                                                                                                                                                              |
| RNA | Low | 70.43  | 44.11  | -0.0202 | 0.0067 | 1.6   | K01626 | 3-deoxy-7-phosphoheptulonate synthase [EC:2.5.1.54]                           | Phenylalanine, tyrosine and tryptophan biosynthesis-Biosynthesis of amino acids                                                                                                                                                                                                                                                                                                                                        |
| RNA | Low | 453.43 | 303.59 | -0.0114 | 0.0269 | 1.49  | K01687 | dihydroxy-acid dehydratase [EC:4.2.1.9]                                       | Valine, leucine and isoleucine biosynthesis-Pantothenate and CoA biosynthesis-2-Oxocarboxylic acid metabolism-Biosynthesis of amino acids                                                                                                                                                                                                                                                                              |

|     |     |        |        |         |        |       |        |                                                                                       |                                                                                                                            |
|-----|-----|--------|--------|---------|--------|-------|--------|---------------------------------------------------------------------------------------|----------------------------------------------------------------------------------------------------------------------------|
| RNA | Low | 19.07  | 3.81   | -0.0269 | 0.0067 | 5     | K01788 | N-acylglucosamine-6-phosphate 2-epimerase [EC:5.1.3.9]                                | Amino sugar and nucleotide sugar metabolism                                                                                |
| RNA | Low | 435.07 | 250.49 | -0.0202 | 0.0164 | 1.74  | K01848 | methylmalonyl-CoA mutase, N-terminal domain [EC:5.4.99.2]                             | Valine, leucine and isoleucine degradation-Propanoate metabolism-Carbon fixation pathways in prokaryotes-Carbon metabolism |
| RNA | Low | 90.04  | 52.8   | -0.0185 | 0.0164 | 1.71  | K01849 | methylmalonyl-CoA mutase, C-terminal domain [EC:5.4.99.2]                             | Valine, leucine and isoleucine degradation-Propanoate metabolism-Carbon fixation pathways in prokaryotes-Carbon metabolism |
| RNA | Low | 121.21 | 49.39  | -0.0202 | 0.0067 | 2.45  | K01989 | putative ABC transport system substrate-binding protein                               | -                                                                                                                          |
| RNA | Low | 19.88  | 8.39   | -0.0253 | 0.0067 | 2.37  | K02007 | cobalt/nickel transport system permease protein                                       | ABC transporters                                                                                                           |
| RNA | Low | 156.96 | 98.04  | -0.0164 | 0.0164 | 1.6   | K02028 | polar amino acid transport system ATP-binding protein [EC:3.6.3.21]                   | -                                                                                                                          |
| RNA | Low | 199.63 | 129.86 | -0.0146 | 0.0212 | 1.54  | K02029 | polar amino acid transport system permease protein                                    | -                                                                                                                          |
| RNA | Low | 43.48  | 2.28   | -0.0239 | 0.0067 | 19.07 | K02746 | PTS system, N-acetylgalactosamine-specific IIC component                              | Galactose metabolism-Phosphotransferase system (PTS)                                                                       |
| RNA | Low | 53.67  | 2.93   | -0.0198 | 0.0067 | 18.3  | K02747 | PTS system, N-acetylgalactosamine-specific IID component                              | Galactose metabolism-Phosphotransferase system (PTS)                                                                       |
| RNA | Low | 1.79   | 0.73   | -0.0154 | 0.0413 | 2.46  | K02756 | PTS system, beta-glucosides-specific IIB component [EC:2.7.1.69]                      | Phosphotransferase system (PTS)                                                                                            |
| RNA | Low | 132.00 | 29.88  | -0.0109 | 0.0067 | 4.42  | K02760 | PTS system, cellobiose-specific IIB component [EC:2.7.1.69]                           | Phosphotransferase system (PTS)                                                                                            |
| RNA | Low | 268.84 | 72.75  | -0.0098 | 0.0191 | 3.7   | K02761 | PTS system, cellobiose-specific IIC component                                         | Phosphotransferase system (PTS)                                                                                            |
| RNA | Low | 1.90   | 0.52   | -0.0205 | 0.0067 | 3.68  | K02774 | PTS system, galactitol-specific IIB component [EC:2.7.1.69]                           | Galactose metabolism-Phosphotransferase system (PTS)                                                                       |
| RNA | Low | 484.38 | 212.72 | -0.0186 | 0.0164 | 2.28  | K02793 | PTS system, mannose-specific IIA component [EC:2.7.1.69]                              | Fructose and mannose metabolism-Amino sugar and nucleotide sugar metabolism-Phosphotransferase system (PTS)                |
| RNA | Low | 17.99  | 11.85  | -0.0184 | 0.0269 | 1.52  | K02825 | pyrimidine operon attenuation protein / uracil phosphoribosyltransferase [EC:2.4.2.9] | Pyrimidine metabolism                                                                                                      |
| RNA | Low | 1.79   | 0.52   | -0.0154 | 0.0067 | 3.43  | K03478 | hypothetical protein                                                                  | -                                                                                                                          |
| RNA | Low | 8.65   | 4.03   | -0.0206 | 0.0067 | 2.15  | K03484 | LacI family transcriptional regulator, sucrose operon repressor                       | -                                                                                                                          |
| RNA | Low | 2.37   | 0.26   | -0.0161 | 0.0067 | 8.97  | K03492 | GntR family transcriptional regulator                                                 | -                                                                                                                          |
| RNA | Low | 426.67 | 242.32 | -0.0163 | 0.0191 | 1.76  | K03521 | electron transfer flavoprotein beta subunit                                           | -                                                                                                                          |
| RNA | Low | 514.93 | 321.65 | -0.0133 | 0.0191 | 1.6   | K03522 | electron transfer flavoprotein alpha subunit                                          | -                                                                                                                          |
| RNA | Low | 77.4   | 19.49  | -0.0164 | 0.0067 | 3.97  | K03688 | ubiquinone biosynthesis protein                                                       | Ubiquinone and other terpenoid-quinone biosynthesis                                                                        |
| RNA | Low | 9.39   | 4.74   | -0.0178 | 0.0269 | 1.98  | K03722 | ATP-dependent DNA helicase DinG [EC:3.6.4.12]                                         | -                                                                                                                          |
| RNA | Low | 2.70   | 0.3    | -0.0249 | 0.0067 | 8.94  | K03741 | arsenate reductase [EC:1.20.4.1]                                                      | -                                                                                                                          |
| RNA | Low | 6.89   | 3.13   | -0.0172 | 0.0067 | 2.2   | K03785 | 3-dehydroquininate dehydratase I [EC:4.2.1.10]                                        | Phenylalanine, tyrosine and tryptophan biosynthesis-Biosynthesis of amino acids                                            |
| RNA | Low | 2.19   | 1.02   | -0.0244 | 0.0067 | 2.13  | K04014 | protein NrfC                                                                          | -                                                                                                                          |
| RNA | Low | 1.27   | 0.46   | -0.0134 | 0.0252 | 2.75  | K05339 | holin-like protein LrgB                                                               | Two-component system                                                                                                       |
| RNA | Low | 2.61   | 1.46   | -0.0248 | 0.0297 | 1.79  | K05587 | bidirectional [NiFe] hydrogenase diaphorase subunit [EC:1.6.5.3]                      | Oxidative phosphorylation                                                                                                  |
| RNA | Low | 1.56   | 0.51   | -0.0211 | 0.0126 | 3.05  | K05817 | LysR family transcriptional regulator, hca operon transcriptional activator           | -                                                                                                                          |

|     |     |        |       |         |        |       |        |                                                                                                                    |                                                                                                                                    |
|-----|-----|--------|-------|---------|--------|-------|--------|--------------------------------------------------------------------------------------------------------------------|------------------------------------------------------------------------------------------------------------------------------------|
| RNA | Low | 62.45  | 22.12 | -0.0182 | 0.0067 | 2.82  | K05832 | putative ABC transport system permease protein                                                                     | -                                                                                                                                  |
| RNA | Low | 2.83   | 1.09  | -0.0163 | 0.0067 | 2.59  | K05847 | osmoprotectant transport system ATP-binding protein                                                                | ABC transporters                                                                                                                   |
| RNA | Low | 220.98 | 69.23 | -0.0188 | 0.0067 | 3.19  | K05919 | superoxide reductase [EC:1.15.1.2]                                                                                 | -                                                                                                                                  |
| RNA | Low | 2.29   | 1.14  | -0.0089 | 0.0381 | 2.01  | K06518 | holin-like protein                                                                                                 | -                                                                                                                                  |
| RNA | Low | 29.95  | 9.78  | -0.0098 | 0.0212 | 3.06  | K06902 | MFS transporter, UMF1 family                                                                                       | -                                                                                                                                  |
| RNA | Low | 88.09  | 59.89 | -0.0197 | 0.0067 | 1.47  | K07024 | unknown hydrolase                                                                                                  | -                                                                                                                                  |
| RNA | Low | 16.75  | 10.5  | -0.0095 | 0.0347 | 1.6   | K07050 | misacylated tRNA(Ala) deacylase [EC:3.1.1.-]                                                                       | -                                                                                                                                  |
| RNA | Low | 0.90   | 0.34  | -0.0316 | 0.0067 | 2.63  | K07309 | Tat-targeted selenate reductase subunit YnfE [EC:1.97.1.9]                                                         | Selenocompound metabolism                                                                                                          |
| RNA | Low | 19.54  | 13.81 | -0.0148 | 0.0454 | 1.41  | K07473 | DNA-damage-inducible protein J                                                                                     | -                                                                                                                                  |
| RNA | Low | 0.54   | 0.14  | -0.0178 | 0.0067 | 3.93  | K07508 | acetyl-CoA acyltransferase 2 [EC:2.3.1.16]                                                                         | Fatty acid elongation-Fatty acid degradation-Valine, leucine and isoleucine degradation-Benzoate degradation-Fatty acid metabolism |
| RNA | Low | 15.69  | 5.38  | -0.0267 | 0.0067 | 2.92  | K07749 | formyl-CoA transferase [EC:2.8.3.16]                                                                               | -                                                                                                                                  |
| RNA | Low | 0.81   | 0.17  | -0.0159 | 0.0067 | 4.73  | K07811 | trimethylamine-N-oxide reductase (cytochrome c) [EC:1.7.2.3]                                                       | Two-component system                                                                                                               |
| RNA | Low | 6.66   | 3.84  | -0.0218 | 0.0067 | 1.74  | K08302 | tagatose 1,6-diphosphate aldolase GatY/KbaY [EC:4.1.2.40]                                                          | Galactose metabolism                                                                                                               |
| RNA | Low | 41.63  | 26.18 | -0.0151 | 0.0191 | 1.59  | K08978 | bacterial/archaeal transporter family protein                                                                      | -                                                                                                                                  |
| RNA | Low | 123.19 | 87.11 | -0.0099 | 0.0232 | 1.41  | K09157 | hypothetical protein                                                                                               | -                                                                                                                                  |
| RNA | Low | 0.12   | 0.00  | -0.0114 | 0.0381 | 37.79 | K09611 | probable aminopeptidase NPEPL1 [EC:3.4.11.-]                                                                       | -                                                                                                                                  |
| RNA | Low | 89.44  | 14.69 | -0.0143 | 0.0067 | 6.09  | K09825 | Fur family transcriptional regulator, peroxide stress response regulator                                           | -                                                                                                                                  |
| RNA | Low | 11.88  | 6.84  | -0.0226 | 0.0232 | 1.74  | K10010 | cystine transport system ATP-binding protein [EC:3.6.3.-]                                                          | ABC transporters                                                                                                                   |
| RNA | Low | 16.68  | 8.53  | -0.0206 | 0.0191 | 1.96  | K10036 | glutamine transport system substrate-binding protein                                                               | ABC transporters                                                                                                                   |
| RNA | Low | 9.77   | 5.68  | -0.0186 | 0.0252 | 1.72  | K10118 | raffinose/stachyose/melibiose transport system permease protein                                                    | ABC transporters                                                                                                                   |
| RNA | Low | 44.22  | 19.6  | -0.0237 | 0.0413 | 2.26  | K10192 | oligogalacturonide transport system substrate-binding protein                                                      | ABC transporters                                                                                                                   |
| RNA | Low | 0.22   | 0.03  | -0.0327 | 0.0067 | 7.46  | K12261 | 2-hydroxyacyl-CoA lyase 1 [EC:4.1.-.-]                                                                             | Peroxisome                                                                                                                         |
| RNA | Low | 2.81   | 1.19  | -0.0255 | 0.0067 | 2.36  | K12297 | 23S rRNA (guanine2445-N2)-methyltransferase / 23S rRNA (guanine2069-N7)-methyltransferase [EC:2.1.1.173 2.1.1.264] | -                                                                                                                                  |
| RNA | Low | 0.33   | 0.08  | -0.0128 | 0.0316 | 3.9   | K12554 | alanine adding enzyme [EC:2.3.2.-]                                                                                 | Peptidoglycan biosynthesis                                                                                                         |
| RNA | Low | 0.26   | 0.07  | -0.0285 | 0.047  | 3.87  | K13794 | LysR family transcriptional regulator, regulatory protein for <i>tcuABC</i>                                        | -                                                                                                                                  |
| RNA | Low | 1.83   | 0.95  | -0.0261 | 0.047  | 1.91  | K13921 | 1-propanol dehydrogenase                                                                                           | Glycerolipid metabolism                                                                                                            |
| RNA | Low | 44.14  | 19.7  | -0.0206 | 0.0164 | 2.24  | K14138 | acetyl-CoA synthase [EC:2.3.1.169]                                                                                 | Carbon fixation pathways in prokaryotes-Carbon metabolism                                                                          |
| RNA | Low | 29.5   | 18.05 | -0.0218 | 0.0252 | 1.63  | K14170 | chorismate mutase / prephenate dehydratase [EC:5.4.99.5 4.2.1.51]                                                  | Phenylalanine, tyrosine and tryptophan biosynthesis-Biosynthesis of amino acids                                                    |
| RNA | Low | 2.26   | 0.97  | -0.0227 | 0.0285 | 2.33  | K15023 | 5-methyltetrahydrofolate corrinoid/iron sulfur protein methyltransferase [EC:2.1.1.258]                            | Carbon fixation pathways in prokaryotes-Carbon metabolism                                                                          |
