# Supplementary material for: Rumen metagenome and metatranscriptome analyses of low methane yield sheep reveals a Sharpea-enriched microbiome characterised by lactic acid formation and utilisation
Source: PubMed Central journal article supplement (PMC5069950; doi:10.1186/s40168-016-0201-2), 2016-10-19
Supplement: 40168_2016_201_MOESM4_ESM.pdf [file 40168_2016_201_MOESM4_ESM.pdf]

Table S3. Gene set enrichment analysis of metagenome and metatranscriptome datasets. Pathways with genes differentially present or expressed based on nominal  $P$  value (NOM  $P$ -val  $\leq 0.05$ ) are shown, ranked by normalised enrichment score (NES). Corrected  $P$  values for false discovery rate (FDR q-val) and familywise-error rate (FEWER  $P$ -val) are shown.

| Methane yield group | KEGG Pathway                                         | NES   | NOM $P$ -val | FDR val | q- | FEWER $P$ -val |
|---------------------|------------------------------------------------------|-------|--------------|---------|----|----------------|
| Metagenome          |                                                      |       |              |         |    |                |
| Low                 | ko00052-Galactose metabolism                         | -1.97 | 0.003        | 0.017   |    | 0.015          |
| Low                 | ko02060-Phosphotransferase systems (PTS)             | -1.82 | 0.015        | 0.092   |    | 0.120          |
| Low                 | ko00440-Phosphonate and phosphinate metabolism       | -1.62 | 0.012        | 0.734   |    | 0.602          |
| Low                 | ko00561- Glycerolipid metabolism                     | -1.58 | 0.047        | 0.544   |    | 0.701          |
| Low                 | ko00290- Valine, leucine, isoleucine biosynthesis    | -1.57 | 0.036        | 0.496   |    | 0.716          |
| Low                 | ko00791- Atrazine degradation                        | -1.53 | 0.040        | 0.608   |    | 0.801          |
| Low                 | ko01212- Fatty acid metabolism                       | -1.45 | 0.043        | 0.786   |    | 0.909          |
| High                | ko03070-Bacterial secretion system                   | 1.70  | 0.019        | 0.470   |    | 0.386          |
| High                | ko00983- Drug metabolism and other enzymes           | 1.55  | 0.039        | 0.688   |    | 0.773          |
| High                | ko00250- Alanine, aspartate and glutamate metabolism | 1.55  | 0.036        | 0.538   |    | 0.782          |
| Metatranscriptome   |                                                      |       |              |         |    |                |
| Low                 | ko00052-Galactose metabolism                         | -1.72 | 0.010        | 0.511   |    | 0.270          |
| Low                 | ko00630-Glyoxylate and dicarboxylate metabolism      | -1.69 | 0.005        | 0.362   |    | 0.348          |
| Low                 | ko00720-Carbon fixation pathways in prokaryotes      | -1.64 | 0.010        | 0.427   |    | 0.507          |
| Low                 | ko01230-Biosynthesis of amino acids                  | -1.61 | 0.035        | 0.393   |    | 0.570          |
| Low                 | ko00550-Peptidoglycan biosynthesis                   | -1.60 | 0.020        | 0.365   |    | 0.612          |
| Low                 | ko00300-Lysine biosynthesis                          | -1.58 | 0.030        | 0.316   |    | 0.669          |
| Low                 | ko00290-Valine, leucine, isoleucine biosynthesis     | -1.55 | 0.040        | 0.311   |    | 0.736          |
| Low                 | ko00450-Selenocompound metabolism                    | -1.52 | 0.033        | 0.311   |    | 0.792          |
| Low                 | ko00330-Arginine and proline metabolism              | -1.48 | 0.038        | 0.373   |    | 0.870          |
