# Supplementary material for: Rumen metagenome and metatranscriptome analyses of low methane yield sheep reveals a Sharpea-enriched microbiome characterised by lactic acid formation and utilisation
Source: PubMed Central journal article supplement (PMC5069950; doi:10.1186/s40168-016-0201-2), 2016-10-19
Supplement: 40168_2016_201_MOESM7_ESM.pdf [file 40168_2016_201_MOESM7_ESM.pdf]

Table S4. Statistical data of KEGG genes related to low or high methane yield animals for Wilcoxon Rank Sum test (WRS) and sparse partial least squares analysis (sPLS).

| Subset                 | Data type        | KEGG Gene | Gene name        | DEFINITION                                                                                 | Mean    |        | Standard dev |        | WRS    | sPLS     |             |          |           |
|------------------------|------------------|-----------|------------------|--------------------------------------------------------------------------------------------|---------|--------|--------------|--------|--------|----------|-------------|----------|-----------|
|                        |                  |           |                  |                                                                                            | low     | high   | low          | high   |        | p.adj.BH | Fold change | Range2.5 | Range97.5 |
| Aminoacid biosynthesis | DNA              | K00013    | hisD             | histidinol dehydrogenase [EC:1.1.1.23]                                                     | 239     | 231    | 27.7         | 20.7   | 1      | 1.03     | NA          | NA       | NA        |
| Aminoacid biosynthesis | RNA              | K00013    | hisD             | histidinol dehydrogenase [EC:1.1.1.23]                                                     | 173     | 140    | 24.6         | 13     | 0.126  | 1.24     | NA          | NA       | NA        |
| Aminoacid biosynthesis | Transcripts/gene | NA        | hisD             | histidinol dehydrogenase [EC:1.1.1.23]                                                     | 0.738   | 0.611  | 0.153        | 0.0773 | 0.274  | 1.21     | NA          | NA       | NA        |
| Aminoacid biosynthesis | DNA              | K09484    | qa-3             | quininate dehydrogenase [EC:1.1.1.24]                                                      | 0.00453 | 0.0589 | 0.00627      | 0.0878 | 0.468  | 13       | NA          | NA       | NA        |
| Aminoacid biosynthesis | DNA              | K00014    | aroE             | shikimate dehydrogenase [EC:1.1.1.25]                                                      | 175     | 164    | 19.1         | 11.3   | 0.938  | 1.07     | NA          | NA       | NA        |
| Aminoacid biosynthesis | RNA              | K00014    | aroE             | shikimate dehydrogenase [EC:1.1.1.25]                                                      | 83.1    | 69.2   | 10.3         | 9.37   | 0.142  | 1.2      | NA          | NA       | NA        |
| Aminoacid biosynthesis | Transcripts/gene | NA        | aroE             | 3-dehydroquininate dehydratase / shikimate dehydrogenase [EC:4.2.1.10 1.1.1.25]            | 0.473   | 0.418  | 0.088        | 0.0628 | 0.354  | 1.13     | NA          | NA       | NA        |
| Aminoacid biosynthesis | DNA              | K00016    | ldh              | L-lactate dehydrogenase [EC:1.1.1.27]                                                      | 92.8    | 62.6   | 21.2         | 13.4   | 0.0359 | 1.48     | -0.0102     | -0.00375 | -0.00691  |
| Aminoacid biosynthesis | RNA              | K00016    | ldh              | L-lactate dehydrogenase [EC:1.1.1.27]                                                      | 76.6    | 193    | 14.9         | 25.9   | 0.519  | 2.52     | NA          | NA       | NA        |
| Aminoacid biosynthesis | Transcripts/gene | NA        | ldh              | L-lactate dehydrogenase [EC:1.1.1.27]                                                      | 0.842   | 2.71   | 0.162        | 3.15   | 0.315  | 3.23     | NA          | NA       | NA        |
| Aminoacid biosynthesis | DNA              | K05887    | ydiB             | quininate/shikimate dehydrogenase [EC:1.1.1.282]                                           | 0.548   | 0.232  | 0.289        | 0.103  | 0.0536 | 2.37     | NA          | NA       | NA        |
| Aminoacid biosynthesis | RNA              | K05887    | ydiB             | quininate/shikimate dehydrogenase [EC:1.1.1.282]                                           | 0.138   | 0.0444 | 0.104        | 0.0323 | 0.0794 | 3.1      | NA          | NA       | NA        |
| Aminoacid biosynthesis | Transcripts/gene | NA        | ydiB             | quininate/shikimate dehydrogenase [EC:1.1.1.282]                                           | 0.279   | 0.214  | 0.199        | 0.137  | 0.713  | 1.3      | NA          | NA       | NA        |
| Aminoacid biosynthesis | RNA              | K00003    | NA               | homoserine dehydrogenase [EC:1.1.1.3]                                                      | 73.8    | 63.2   | 13.1         | 5.93   | 0.283  | 1.17     | NA          | NA       | NA        |
| Aminoacid biosynthesis | Transcripts/gene | NA        | NA               | homoserine dehydrogenase [EC:1.1.1.3]                                                      | 1.02    | 0.855  | 0.172        | 0.109  | 0.136  | 1.2      | NA          | NA       | NA        |
| Aminoacid biosynthesis | DNA              | K00030    | IDH3             | isocitrate dehydrogenase (NAD+)                                                            | 22.7    | 22.6   | 3.36         | 6.62   | 1      | 1.04     | NA          | NA       | NA        |
| Aminoacid biosynthesis | RNA              | K00030    | IDH3             | isocitrate dehydrogenase (NAD+)                                                            | 29.9    | 13.5   | 33.6         | 3.36   | 0.187  | 2.21     | NA          | NA       | NA        |
| Aminoacid biosynthesis | Transcripts/gene | NA        | IDH3             | isocitrate dehydrogenase (NAD+)                                                            | 1.22    | 0.584  | 0.935        | 0.0806 | 0.125  | 2.09     | NA          | NA       | NA        |
| Aminoacid biosynthesis | DNA              | K00031    | icd              | isocitrate dehydrogenase [EC:1.1.1.42]                                                     | 128     | 123    | 22.8         | 22.7   | 1      | 1.04     | NA          | NA       | NA        |
| Aminoacid biosynthesis | RNA              | K00031    | icd              | isocitrate dehydrogenase [EC:1.1.1.42]                                                     | 149     | 135    | 36.3         | 29.9   | 0.623  | 1.1      | NA          | NA       | NA        |
| Aminoacid biosynthesis | Transcripts/gene | NA        | icd              | isocitrate dehydrogenase [EC:1.1.1.42]                                                     | 1.2     | 1.12   | 0.4          | 0.24   | 0.838  | 1.08     | NA          | NA       | NA        |
| Aminoacid biosynthesis | DNA              | K00052    | leuB             | 3-isopropylmalate dehydrogenase [EC:1.1.1.85]                                              | 194     | 172    | 21.7         | 12.7   | 0.45   | 1.12     | NA          | NA       | NA        |
| Aminoacid biosynthesis | RNA              | K00052    | leuB             | 3-isopropylmalate dehydrogenase [EC:1.1.1.85]                                              | 217     | 173    | 51           | 28.8   | 0.255  | 1.25     | NA          | NA       | NA        |
| Aminoacid biosynthesis | Transcripts/gene | NA        | leuB             | 3-isopropylmalate dehydrogenase [EC:1.1.1.85]                                              | 1.13    | 1      | 0.262        | 0.155  | 0.426  | 1.12     | NA          | NA       | NA        |
| Aminoacid biosynthesis | DNA              | K00053    | ilvC             | ketol-acid reductoisomerase [EC:1.1.1.86]                                                  | 200     | 180    | 24.3         | 11.8   | 0.394  | 1.11     | NA          | NA       | NA        |
| Aminoacid biosynthesis | RNA              | K00053    | ilvC             | ketol-acid reductoisomerase [EC:1.1.1.86]                                                  | 893     | 670    | 190          | 95.3   | 0.116  | 1.33     | NA          | NA       | NA        |
| Aminoacid biosynthesis | Transcripts/gene | NA        | ilvC             | ketol-acid reductoisomerase [EC:1.1.1.86]                                                  | 4.5     | 3.72   | 0.937        | 0.422  | 0.125  | 1.21     | NA          | NA       | NA        |
| Aminoacid biosynthesis | DNA              | K05824    | LYS12            | homoisocitrate dehydrogenase [EC:1.1.1.87]                                                 | 0.13    | 0.0835 | 0.0623       | 0.0341 | 0.731  | 1.55     | NA          | NA       | NA        |
| Aminoacid biosynthesis | RNA              | K05824    | LYS12            | homoisocitrate dehydrogenase [EC:1.1.1.87]                                                 | 0.269   | 0.241  | 0.144        | 0.128  | 0.944  | 1.12     | NA          | NA       | NA        |
| Aminoacid biosynthesis | DNA              | K10978    | aksF             | methanogen homoisocitrate dehydrogenase [EC:1.1.1.87 1.1.1.-]                              | 0.045   | 0.108  | 0.0235       | 0.0515 | 0.132  | 2.41     | 0.00577     | 0.0192   | 0.0139    |
| Aminoacid biosynthesis | RNA              | K10978    | aksF             | methanogen homoisocitrate dehydrogenase [EC:1.1.1.87 1.1.1.-]                              | 0.0653  | 0.091  | 0.0538       | 0.0973 | 0.989  | 1.39     | NA          | NA       | NA        |
| Aminoacid biosynthesis | Transcripts/gene | NA        | aksF             | methanogen homoisocitrate dehydrogenase [EC:1.1.1.87 1.1.1.-]                              | 1.94    | 1.85   | 0.663        | 0.959  | 0.785  | 1.05     | NA          | NA       | NA        |
| Aminoacid biosynthesis | DNA              | K00058    | serA             | D-3-phosphoglycerate dehydrogenase [EC:1.1.1.95]                                           | 328     | 330    | 33.4         | 41.9   | 1      | 1.01     | NA          | NA       | NA        |
| Aminoacid biosynthesis | RNA              | K00058    | serA             | D-3-phosphoglycerate dehydrogenase [EC:1.1.1.95]                                           | 551     | 488    | 90.6         | 46.1   | 0.206  | 1.13     | NA          | NA       | NA        |
| Aminoacid biosynthesis | Transcripts/gene | NA        | serA             | D-3-phosphoglycerate dehydrogenase [EC:1.1.1.95]                                           | 1.7     | 1.5    | 0.366        | 0.225  | 0.31   | 1.14     | NA          | NA       | NA        |
| Aminoacid biosynthesis | DNA              | K05358    | quia             | quininate dehydrogenase (quinone) [EC:1.1.5.8]                                             | 0.0137  | 0.0116 | 0.00915      | 0.0082 | 1      | 1.18     | NA          | NA       | NA        |
| Aminoacid biosynthesis | Transcripts/gene | NA        | NA               | 1,2-dihydroxy-3-keto-5-methylthiopentene dioxigenase [EC:1.13.11.53 1.13.11.54]            | 8.33    | 5.93   | 14.1         | 9.51   | 0.942  | 1.41     | NA          | NA       | NA        |
| Aminoacid biosynthesis | DNA              | K08967    | mntD, mtnZ, ADI1 | 1,2-dihydroxy-3-keto-5-methylthiopentene dioxigenase [EC:1.13.11.53 1.13.11.54]            | 0.0126  | 0.0048 | 0.0115       | 0.0052 | 0.687  | 2.66     | NA          | NA       | NA        |
| Aminoacid biosynthesis | RNA              | K08967    | mntD, mtnZ, ADI1 | 1,2-dihydroxy-3-keto-5-methylthiopentene dioxigenase [EC:1.13.11.53 1.13.11.54]            | 0.0722  | 0.0495 | 0.0723       | 0.0378 | 0.788  | 1.46     | NA          | NA       | NA        |
| Aminoacid biosynthesis | Transcripts/gene | NA        | NA               | 1,2-dihydroxy-3-keto-5-methylthiopentene dioxigenase [EC:1.13.11.53 1.13.11.54]            | 8.33    | 5.93   | 14.1         | 9.51   | 0.942  | 1.41     | NA          | NA       | NA        |
| Aminoacid biosynthesis | DNA              | K00500    | phhA             | phenylalanine-4-hydroxylase [EC:1.14.16.1]                                                 | 0.0236  | 0.0148 | 0.0152       | 0.0106 | 0.795  | 1.6      | NA          | NA       | NA        |
| Aminoacid biosynthesis | DNA              | K05933    | NA               | aminocyclopropanecarboxylate oxidase [EC:1.14.17.4]                                        | 0.00975 | 0.0119 | 0.0072       | 0.0099 | 1      | 1.22     | NA          | NA       | NA        |
| Aminoacid biosynthesis | RNA              | K05933    | NA               | aminocyclopropanecarboxylate oxidase [EC:1.14.17.4]                                        | 0.128   | 0.15   | 0.0746       | 0.138  | 0.944  | 1.17     | NA          | NA       | NA        |
| Aminoacid biosynthesis | Transcripts/gene | NA        | NA               | aminocyclopropanecarboxylate oxidase [EC:1.14.17.4]                                        | 12.7    | 23.6   | 9.54         | 31.2   | 0.902  | 1.86     | NA          | NA       | NA        |
| Aminoacid biosynthesis | DNA              | K00215    | dapB             | 4-hydroxy-tetrahydrodipicolinate reductase [EC:1.17.1.8]                                   | 220     | 193    | 23           | 8.02   | 0.132  | 1.14     | NA          | NA       | NA        |
| Aminoacid biosynthesis | RNA              | K00215    | dapB             | 4-hydroxy-tetrahydrodipicolinate reductase [EC:1.17.1.8]                                   | 159     | 142    | 18.6         | 16     | 0.312  | 1.12     | NA          | NA       | NA        |
| Aminoacid biosynthesis | Transcripts/gene | NA        | dapB             | 4-hydroxy-tetrahydrodipicolinate reductase [EC:1.17.1.8]                                   | 0.729   | 0.737  | 0.117        | 0.0707 | 0.895  | 1.01     | NA          | NA       | NA        |
| Aminoacid biosynthesis | DNA              | K00133    | asd              | aspartate-semialdehyde dehydrogenase [EC:1.2.1.11]                                         | 278     | 276    | 24.3         | 15.9   | 1      | 1.01     | NA          | NA       | NA        |
| Aminoacid biosynthesis | RNA              | K00133    | asd              | aspartate-semialdehyde dehydrogenase [EC:1.2.1.11]                                         | 310     | 248    | 55.1         | 30     | 0.144  | 1.25     | NA          | NA       | NA        |
| Aminoacid biosynthesis | Transcripts/gene | NA        | asd              | aspartate-semialdehyde dehydrogenase [EC:1.2.1.11]                                         | 1.12    | 0.9    | 0.221        | 0.106  | 0.125  | 1.25     | NA          | NA       | NA        |
| Aminoacid biosynthesis | DNA              | K00134    | gapA             | glyceraldehyde 3-phosphate dehydrogenase [EC:1.2.1.12]                                     | 302     | 302    | 25.9         | 16.5   | 1      | 1        | NA          | NA       | NA        |
| Aminoacid biosynthesis | RNA              | K00134    | gapA             | glyceraldehyde 3-phosphate dehydrogenase [EC:1.2.1.12]                                     | 6860    | 6040   | 1910         | 1500   | 0.519  | 1.14     | NA          | NA       | NA        |
| Aminoacid biosynthesis | Transcripts/gene | NA        | gapA             | glyceraldehyde 3-phosphate dehydrogenase [EC:1.2.1.12]                                     | 22.8    | 20.1   | 6            | 5.28   | 0.594  | 1.13     | NA          | NA       | NA        |
| Aminoacid biosynthesis | Transcripts/gene | NA        | ALDH3A2          | aldehyde dehydrogenase family 7 member A1 [EC:1.2.1.31 1.2.1.8 1.2.1.3]                    | 0.671   | 0.548  | 0.391        | 0.147  | 0.838  | 1.22     | NA          | NA       | NA        |
| Aminoacid biosynthesis | DNA              | K00143    | LYS2             | L-aminoadipate-semialdehyde dehydrogenase [EC:1.2.1.31]                                    | 1.78    | 1.63   | 0.471        | 0.32   | 1      | 1.09     | NA          | NA       | NA        |
| Aminoacid biosynthesis | RNA              | K00143    | LYS2             | L-aminoadipate-semialdehyde dehydrogenase [EC:1.2.1.31]                                    | 0.251   | 0.391  | 0.0892       | 0.231  | 0.424  | 1.56     | NA          | NA       | NA        |
| Aminoacid biosynthesis | Transcripts/gene | NA        | ALDH7A1          | aldehyde dehydrogenase family 7 member A1 [EC:1.2.1.31 1.2.1.8 1.2.1.3]                    | 0.229   | 0.34   | 0.143        | 0.147  | 0.274  | 1.48     | NA          | NA       | NA        |
| Aminoacid biosynthesis | RNA              | K14085    | ALDH7A1          | aldehyde dehydrogenase family 7 member A1 [EC:1.2.1.31 1.2.1.8 1.2.1.3]                    | 0.0592  | 0.0875 | 0.0591       | 0.0726 | 0.853  | 1.48     | NA          | NA       | NA        |
| Aminoacid biosynthesis | DNA              | K00145    | argC             | N-acetyl-gamma-glutamyl-phosphate reductase [EC:1.2.1.38]                                  | 218     | 212    | 23.2         | 15.5   | 1      | 1.03     | NA          | NA       | NA        |
| Aminoacid biosynthesis | RNA              | K00145    | argC             | N-acetyl-gamma-glutamyl-phosphate reductase [EC:1.2.1.38]                                  | 131     | 96     | 28.1         | 13     | 0.0736 | 1.37     | NA          | NA       | NA        |
| Aminoacid biosynthesis | Transcripts/gene | NA        | ARG56            | N-acetyl-gamma-glutamyl-phosphate reductase / acetylglutamate kinase [EC:1.2.1.38 2.7.2.8] | 0.608   | 0.456  | 0.133        | 0.0649 | 0.125  | 1.33     | NA          | NA       | NA        |
| Aminoacid biosynthesis | DNA              | K12659    | ARG56            | N-acetyl-gamma-glutamyl-phosphate reductase / acetylglutamate kinase [EC:1.2.1.38 2.7.2.8] | 0.0028  | 0.0066 | 0.0033       | 0.0057 | 0.45   | 2.34     | NA          | NA       | NA        |
| Aminoacid biosynthesis | RNA              | K12659    | ARG56            | N-acetyl-gamma-glutamyl-phosphate reductase / acetylglutamate kinase [EC:1.2.1.38 2.7.2.8] | 0.0652  | 0.232  | 0.0637       | 0.126  | 0.0853 | 3.56     | NA          | NA       | NA        |
| Aminoacid biosynthesis | DNA              | K00147    | proA             | glutamate-5-semialdehyde dehydrogenase [EC:1.2.1.41]                                       | 251     | 249    | 30.2         | 20.3   | 1      | 1.01     | NA          | NA       | NA        |
| Aminoacid biosynthesis | RNA              | K00147    | proA             | glutamate-5-semialdehyde dehydrogenase [EC:1.2.1.41]                                       | 167     | 132    | 25.7         | 25.8   | 0.0822 | 1.26     | NA          | NA       | NA        |
| Aminoacid biosynthesis | Transcripts/gene | NA        | ALDH18A1         | delta-1-pyrroline-5-carboxylate synthetase [EC:2.7.2.11 1.2.1.41]                          | 0.672   | 0.531  | 0.118        | 0.0841 | 0.136  | 1.27     | NA          | NA       | NA        |
| Aminoacid biosynthesis | DNA              | K00150    | gap2             | glyceraldehyde-3-phosphate dehydrogenase (NAD(P)) [EC:1.2.1.59]                            | 11.3    | 13     | 2.44         | 3.75   | 0.62   | 1.15     | NA          | NA       | NA        |
| Aminoacid biosynthesis | RNA              | K00150    | gap2             | glyceraldehyde-3-phosphate dehydrogenase (NAD(P)) [EC:1.2.1.59]                            | 13.7    | 13.9   | 7.35         | 3.91   | 0.623  | 1.01     | NA          | NA       | NA        |
| Aminoacid biosynthesis | Transcripts/gene | NA        | gap2             | glyceraldehyde-3-phosphate dehydrogenase (NAD(P)) [EC:1.2.1.59]                            | 1.32    | 1.17   | 0.9          | 0.529  | 0.895  | 1.13     | NA          | NA       | NA        |
| Aminoacid biosynthesis | Transcripts/gene | NA        | ALDH7A1          | aldehyde dehydrogenase family 7 member A1 [EC:1.2.1.31 1.2.1.8 1.2.1.3]                    | 1.76    | 1.46   | 1.86         | 0.498  | 0.785  | 1.2      | NA          | NA       | NA        |
| Aminoacid biosynthesis | DNA              | K00210    | NA               | prephenate dehydrogenase [EC:1.3.1.12]                                                     | 66.4    | 67     | 7.57         | 13     | 1      | 1.01     | NA          | NA       | NA        |
| Aminoacid biosynthesis | RNA              | K00210    | NA               | prephenate dehydrogenase [EC:1.3.1.12]                                                     | 91.7    | 57.7   | 26.1         | 26.7   | 0.185  | 1.59     | NA          | NA       | NA        |
| Aminoacid biosynthesis | DNA              | K04517    | tyrA2            | prephenate dehydrogenase [EC:1.3.1.12]                                                     | 97.3    | 93.8   | 14.7         | 19.6   | 1      | 1.04     | NA          | NA       | NA        |
| Aminoacid biosynthesis | RNA              | K04517    | tyrA2            | prephenate dehydrogenase [EC:1.3.1.12]                                                     | 32.9    | 26.1   | 5.56         | 7.09   | 0.229  | 1.26     | NA          | NA       | NA        |
| Aminoacid biosynthesis | Transcripts/gene | NA        | tyrA             | chorismate mutase / prephenate dehydrogenase [EC:5.4.99.5 1.3.1.12]                        | 0.771   | 0.519  | 0.211        | 0.145  | 0.136  | 1.49     | NA          | NA       | NA        |
| Aminoacid biosynthesis | Transcripts/gene | NA        | tyrC             | cyclohexadienyl/prephenate dehydrogenase [EC:1.3.1.43 1.3.1.12]                            | 0.817   | 0.326  | 0.933        | 0.299  | 0.491  | 2.51     | NA          | NA       | NA        |
| Aminoacid biosynthesis | DNA              | K00220    | tyrC             | cyclohexadienyl/prephenate dehydrogenase [EC:1.3.1.43 1.3.1.12]                            | 0.195   | 0.52   | 0.0799       | 0.407  | 0.252  |          |             |          |           |

|                        |                  |        |                  |                                                                                      |         |        |         |        |         |      |          |          |          |
|------------------------|------------------|--------|------------------|--------------------------------------------------------------------------------------|---------|--------|---------|--------|---------|------|----------|----------|----------|
| Aminoacid biosynthesis | Transcripts/gene | NA     | gltB             | glutamate synthase (NADPH/NADH) small chain [EC:1.4.1.13 1.4.1.14]                   | 0.715   | 0.542  | 0.132   | 0.0644 | 0.125   | 1.32 | NA       | NA       | NA       |
| Aminoacid biosynthesis | DNA              | K00264 | GLT1             | glutamate synthase (NADPH/NADH) [EC:1.4.1.13 1.4.1.14]                               | 4.11    | 4.11   | 0.724   | 0.986  | 1       | 1    | NA       | NA       | NA       |
| Aminoacid biosynthesis | RNA              | K00264 | GLT1             | glutamate synthase (NADPH/NADH) [EC:1.4.1.13 1.4.1.14]                               | 1.13    | 0.777  | 0.198   | 0.335  | 0.121   | 1.45 | NA       | NA       | NA       |
| Aminoacid biosynthesis | DNA              | K00265 | gltB             | glutamate synthase (NADPH/NADH) large chain [EC:1.4.1.13 1.4.1.14]                   | 426     | 396    | 69.4    | 70.4   | 0.968   | 1.07 | NA       | NA       | NA       |
| Aminoacid biosynthesis | DNA              | K00266 | gltD             | glutamate synthase (NADPH/NADH) small chain [EC:1.4.1.13 1.4.1.14]                   | 770     | 738    | 80.6    | 41.9   | 0.968   | 1.04 | NA       | NA       | NA       |
| Aminoacid biosynthesis | RNA              | K00266 | gltD             | glutamate synthase (NADPH/NADH) small chain [EC:1.4.1.13 1.4.1.14]                   | 802     | 595    | 98.2    | 64.7   | 0.0406  | 1.35 | NA       | NA       | NA       |
| Aminoacid biosynthesis | Transcripts/gene | NA     | gltD             | glutamate synthase (NADPH/NADH) small chain [EC:1.4.1.13 1.4.1.14]                   | 0.715   | 0.542  | 0.132   | 0.0644 | 0.125   | 1.32 | NA       | NA       | NA       |
| Aminoacid biosynthesis | DNA              | K03340 | dapdh            | diaminopimelate dehydrogenase [EC:1.4.1.16]                                          | 172     | 184    | 16.8    | 11.1   | 0.62    | 1.07 | NA       | NA       | NA       |
| Aminoacid biosynthesis | RNA              | K03340 | dapdh            | diaminopimelate dehydrogenase [EC:1.4.1.16]                                          | 231     | 206    | 86.3    | 60.1   | 0.623   | 1.12 | NA       | NA       | NA       |
| Aminoacid biosynthesis | Transcripts/gene | NA     | dapdh            | diaminopimelate dehydrogenase [EC:1.4.1.16]                                          | 1.37    | 1.11   | 0.553   | 0.254  | 0.234   | 1.23 | NA       | NA       | NA       |
| Aminoacid biosynthesis | DNA              | K11646 | NA               | 3-dehydroquinate synthase II [EC:1.4.1.24]                                           | 7.04    | 7.89   | 1.53    | 2.67   | 0.731   | 1.12 | NA       | NA       | NA       |
| Aminoacid biosynthesis | RNA              | K11646 | NA               | 3-dehydroquinate synthase II [EC:1.4.1.24]                                           | 1.16    | 1.56   | 0.389   | 0.771  | 0.623   | 1.35 | NA       | NA       | NA       |
| Aminoacid biosynthesis | Transcripts/gene | NA     | NA               | 3-dehydroquinate synthase II [EC:1.4.1.24]                                           | 0.173   | 0.279  | 0.079   | 0.343  | 0.713   | 1.61 | NA       | NA       | NA       |
| Aminoacid biosynthesis | DNA              | K03334 | IL4H             | L-amino-acid oxidase [EC:1.4.3.2]                                                    | 0.0159  | 0.0095 | 0.0137  | 0.0073 | 0.875   | 1.68 | NA       | NA       | NA       |
| Aminoacid biosynthesis | RNA              | K00293 | LYS9             | saccharopine dehydrogenase (NADP+, L-glutamate forming) [EC:1.5.1.10]                | 1.1     | 0.867  | 0.474   | 0.621  | 0.471   | 1.27 | NA       | NA       | NA       |
| Aminoacid biosynthesis | DNA              | K00286 | proc             | pyrroline-5-carboxylate reductase [EC:1.5.1.2]                                       | 158     | 153    | 19.3    | 10.7   | 1       | 1.03 | NA       | NA       | NA       |
| Aminoacid biosynthesis | RNA              | K00286 | proc             | pyrroline-5-carboxylate reductase [EC:1.5.1.2]                                       | 85.5    | 57.6   | 13.4    | 7.68   | 0.0164  | 1.48 | -0.0256  | -0.0057  | -0.0135  |
| Aminoacid biosynthesis | Transcripts/gene | NA     | proc             | pyrroline-5-carboxylate reductase [EC:1.5.1.2]                                       | 0.547   | 0.378  | 0.102   | 0.0585 | 0.097   | 1.45 | NA       | NA       | NA       |
| Aminoacid biosynthesis | DNA              | K00290 | LYS1             | saccharopine dehydrogenase (NAD+, L-lysine forming) [EC:1.5.1.7]                     | 182     | 175    | 21      | 18.5   | 0.915   | 1.04 | NA       | NA       | NA       |
| Aminoacid biosynthesis | RNA              | K00290 | LYS1             | saccharopine dehydrogenase (NAD+, L-lysine forming) [EC:1.5.1.7]                     | 183     | 170    | 20.1    | 33.5   | 0.626   | 1.08 | NA       | NA       | NA       |
| Aminoacid biosynthesis | Transcripts/gene | NA     | LYS1             | saccharopine dehydrogenase (NAD+, L-lysine forming) [EC:1.5.1.7]                     | 1.02    | 0.964  | 0.161   | 0.117  | 0.594   | 1.05 | NA       | NA       | NA       |
| Aminoacid biosynthesis | DNA              | K00547 | mmuM             | homocysteine S-methyltransferase [EC:2.1.1.10]                                       | 37.8    | 17.8   | 11.7    | 6.24   | 0.0384  | 2.13 | -0.00952 | -0.00444 | -0.00647 |
| Aminoacid biosynthesis | RNA              | K00547 | mmuM             | homocysteine S-methyltransferase [EC:2.1.1.10]                                       | 6.71    | 2.93   | 2.25    | 1      | 0.0126  | 2.29 | -0.0202  | -0.00373 | -0.00917 |
| Aminoacid biosynthesis | Transcripts/gene | NA     | mmuM             | homocysteine S-methyltransferase [EC:2.1.1.10]                                       | 0.178   | 0.176  | 0.0242  | 0.0563 | 0.983   | 1.01 | NA       | NA       | NA       |
| Aminoacid biosynthesis | DNA              | K00548 | metH             | 5-methyltetrahydrofolate-homocysteine methyltransferase [EC:2.1.1.13]                | 596     | 558    | 51.9    | 34.3   | 0.732   | 1.07 | NA       | NA       | NA       |
| Aminoacid biosynthesis | RNA              | K00548 | metH             | 5-methyltetrahydrofolate-homocysteine methyltransferase [EC:2.1.1.13]                | 333     | 252    | 58.4    | 29.3   | 0.0566  | 1.32 | NA       | NA       | NA       |
| Aminoacid biosynthesis | Transcripts/gene | NA     | metH             | 5-methyltetrahydrofolate-homocysteine methyltransferase [EC:2.1.1.13]                | 0.566   | 0.452  | 0.13    | 0.0544 | 0.218   | 1.25 | NA       | NA       | NA       |
| Aminoacid biosynthesis | DNA              | K00549 | metE             | 5-methyltetrahydropteroylglutamate-homocysteine methyltransferase [EC:2.1.1.14]      | 76.6    | 42.7   | 26.3    | 9.64   | 0.00856 | 1.79 | -0.0129  | -0.00218 | -0.00796 |
| Aminoacid biosynthesis | RNA              | K00549 | metE             | 5-methyltetrahydropteroylglutamate-homocysteine methyltransferase [EC:2.1.1.14]      | 13.6    | 9.16   | 5.64    | 1.87   | 0.283   | 1.48 | NA       | NA       | NA       |
| Aminoacid biosynthesis | Transcripts/gene | NA     | metE             | 5-methyltetrahydropteroylglutamate-homocysteine methyltransferase [EC:2.1.1.14]      | 0.183   | 0.222  | 0.0759  | 0.0518 | 0.234   | 1.21 | NA       | NA       | NA       |
| Aminoacid biosynthesis | DNA              | K00558 | dcm              | DNA (cytosine-5)-methyltransferase 1 [EC:2.1.1.37]                                   | 525     | 552    | 60.8    | 46.5   | 0.911   | 1.05 | NA       | NA       | NA       |
| Aminoacid biosynthesis | RNA              | K00558 | dcm              | DNA (cytosine-5)-methyltransferase 1 [EC:2.1.1.37]                                   | 93.9    | 111    | 16.4    | 9.73   | 0.13    | 1.18 | NA       | NA       | NA       |
| Aminoacid biosynthesis | Transcripts/gene | NA     | dcm              | DNA (cytosine-5)-methyltransferase 1 [EC:2.1.1.37]                                   | 0.183   | 0.201  | 0.0553  | 0.0127 | 0.209   | 1.1  | NA       | NA       | NA       |
| Aminoacid biosynthesis | DNA              | K00544 | BHMT             | betaine-homocysteine S-methyltransferase [EC:2.1.1.5]                                | 0.00584 | 0.0042 | 0.00827 | 0.0032 | 1       | 1.39 | NA       | NA       | NA       |
| Aminoacid biosynthesis | DNA              | K00600 | glyA             | glycine hydroxymethyltransferase [EC:2.1.2.1]                                        | 304     | 318    | 24.7    | 19.7   | 0.875   | 1.05 | NA       | NA       | NA       |
| Aminoacid biosynthesis | RNA              | K00600 | glyA             | glycine hydroxymethyltransferase [EC:2.1.2.1]                                        | 552     | 444    | 70.5    | 48.1   | 0.0698  | 1.24 | NA       | NA       | NA       |
| Aminoacid biosynthesis | Transcripts/gene | NA     | glyA             | glycine hydroxymethyltransferase [EC:2.1.2.1]                                        | 1.83    | 1.4    | 0.317   | 0.15   | 0.097   | 1.31 | NA       | NA       | NA       |
| Aminoacid biosynthesis | DNA              | K00611 | argF, argI       | ornithine carbamoyltransferase [EC:2.1.3.3]                                          | 151     | 159    | 17      | 30.7   | 0.675   | 1.05 | NA       | NA       | NA       |
| Aminoacid biosynthesis | RNA              | K00611 | argF, argI       | ornithine carbamoyltransferase [EC:2.1.3.3]                                          | 166     | 160    | 39      | 25.4   | 0.989   | 1.03 | NA       | NA       | NA       |
| Aminoacid biosynthesis | Transcripts/gene | NA     | argF, argI       | ornithine carbamoyltransferase [EC:2.1.3.3]                                          | 1.12    | 1.03   | 0.315   | 0.149  | 0.958   | 1.09 | NA       | NA       | NA       |
| Aminoacid biosynthesis | DNA              | K00615 | tktA, tktB       | transketolase [EC:2.2.1.1]                                                           | 695     | 682    | 66      | 68.6   | 0.939   | 1.02 | NA       | NA       | NA       |
| Aminoacid biosynthesis | RNA              | K00615 | tktA, tktB       | transketolase [EC:2.2.1.1]                                                           | 1430    | 1120   | 159     | 193    | 0.0658  | 1.28 | NA       | NA       | NA       |
| Aminoacid biosynthesis | Transcripts/gene | NA     | tktA, tktB       | transketolase [EC:2.2.1.1]                                                           | 2.07    | 1.67   | 0.303   | 0.383  | 0.136   | 1.24 | NA       | NA       | NA       |
| Aminoacid biosynthesis | DNA              | K00616 | talA, talB       | transaldolase [EC:2.2.1.2]                                                           | 39.1    | 29.1   | 6.57    | 6.97   | 0.158   | 1.34 | NA       | NA       | NA       |
| Aminoacid biosynthesis | RNA              | K00616 | talA, talB       | transaldolase [EC:2.2.1.2]                                                           | 62      | 37.5   | 41.2    | 8.46   | 0.256   | 1.66 | NA       | NA       | NA       |
| Aminoacid biosynthesis | Transcripts/gene | NA     | talA, talB       | transaldolase / glucose-6-phosphate isomerase [EC:2.2.1.2 5.3.1.9]                   | 1.61    | 1.31   | 1.12    | 0.3    | 0.958   | 1.23 | NA       | NA       | NA       |
| Aminoacid biosynthesis | DNA              | K13810 | tal-pgi          | transaldolase / glucose-6-phosphate isomerase [EC:2.2.1.2 5.3.1.9]                   | 0.248   | 0.415  | 0.0443  | 0.161  | 0.301   | 1.68 | NA       | NA       | NA       |
| Aminoacid biosynthesis | RNA              | K13810 | tal-pgi          | transaldolase / glucose-6-phosphate isomerase [EC:2.2.1.2 5.3.1.9]                   | 0.183   | 0.212  | 0.0718  | 0.154  | 0.895   | 1.16 | NA       | NA       | NA       |
| Aminoacid biosynthesis | DNA              | K01652 | ilvB, ilvG, ilvI | acetylacetyltransferase I/II/III large subunit [EC:2.2.1.6]                          | 454     | 445    | 58.7    | 51.5   | 1       | 1.02 | NA       | NA       | NA       |
| Aminoacid biosynthesis | RNA              | K01652 | ilvB, ilvG, ilvI | acetylacetyltransferase I/II/III large subunit [EC:2.2.1.6]                          | 394     | 304    | 53.6    | 35.6   | 0.0526  | 1.3  | NA       | NA       | NA       |
| Aminoacid biosynthesis | DNA              | K01653 | ilvH, ilvN       | acetylacetyltransferase I/II small subunit [EC:2.2.1.6]                              | 116     | 109    | 11.5    | 8.93   | 0.779   | 1.07 | NA       | NA       | NA       |
| Aminoacid biosynthesis | RNA              | K01653 | ilvH, ilvN       | acetylacetyltransferase I/II small subunit [EC:2.2.1.6]                              | 101     | 83.3   | 19.7    | 8.28   | 0.233   | 1.21 | NA       | NA       | NA       |
| Aminoacid biosynthesis | Transcripts/gene | NA     | ilvH, ilvN       | acetylacetyltransferase I/II small subunit [EC:2.2.1.6]                              | 0.88    | 0.706  | 0.164   | 0.102  | 0.136   | 1.25 | NA       | NA       | NA       |
| Aminoacid biosynthesis | DNA              | K00619 | argA             | amino-acid N-acetyltransferase [EC:2.3.1.1]                                          | 2.61    | 4.97   | 1.34    | 3.98   | 0.567   | 1.91 | NA       | NA       | NA       |
| Aminoacid biosynthesis | RNA              | K00619 | argA             | amino-acid N-acetyltransferase [EC:2.3.1.1]                                          | 0.7     | 6.11   | 0.467   | 9.43   | 0.186   | 8.74 | NA       | NA       | NA       |
| Aminoacid biosynthesis | DNA              | K14682 | argAB            | amino-acid N-acetyltransferase [EC:2.3.1.1]                                          | 15.4    | 10.6   | 7.42    | 3.48   | 0.564   | 1.46 | NA       | NA       | NA       |
| Aminoacid biosynthesis | RNA              | K14682 | argAB            | amino-acid N-acetyltransferase [EC:2.3.1.1]                                          | 3.95    | 2.54   | 1.87    | 0.869  | 0.382   | 1.56 | NA       | NA       | NA       |
| Aminoacid biosynthesis | Transcripts/gene | NA     | argAB            | amino-acid N-acetyltransferase [EC:2.3.1.1]                                          | 0.473   | 0.435  | 0.114   | 0.0591 | 0.838   | 1.09 | NA       | NA       | NA       |
| Aminoacid biosynthesis | DNA              | K00674 | dapD             | 2,3,4,5-tetrahydropyridine-2-carboxylate N-succinyltransferase [EC:2.3.1.117]        | 24.3    | 15.8   | 4.42    | 3.36   | 0.0962  | 1.54 | -0.0177  | -0.0016  | -0.0102  |
| Aminoacid biosynthesis | RNA              | K00674 | dapD             | 2,3,4,5-tetrahydropyridine-2-carboxylate N-succinyltransferase [EC:2.3.1.117]        | 12.5    | 6.18   | 3.31    | 1.05   | 0.00669 | 2.02 | -0.0271  | -0.00751 | -0.016   |
| Aminoacid biosynthesis | Transcripts/gene | NA     | dapD             | 2,3,4,5-tetrahydropyridine-2-carboxylate N-succinyltransferase [EC:2.3.1.117]        | 0.518   | 0.4    | 0.102   | 0.0671 | 0.136   | 1.29 | NA       | NA       | NA       |
| Aminoacid biosynthesis | DNA              | K09011 | cimA             | D-citramalate synthase [EC:2.3.1.182]                                                | 127     | 130    | 13.5    | 18.4   | 1       | 1.02 | NA       | NA       | NA       |
| Aminoacid biosynthesis | RNA              | K09011 | cimA             | D-citramalate synthase [EC:2.3.1.182]                                                | 123     | 113    | 37.1    | 50.6   | 0.895   | 1.08 | NA       | NA       | NA       |
| Aminoacid biosynthesis | Transcripts/gene | NA     | cimA             | D-citramalate synthase [EC:2.3.1.182]                                                | 0.984   | 0.846  | 0.339   | 0.296  | 0.636   | 1.16 | NA       | NA       | NA       |
| Aminoacid biosynthesis | DNA              | K00640 | cysE             | serine O-acetyltransferase [EC:2.3.1.30]                                             | 232     | 211    | 13.3    | 13.4   | 0.176   | 1.1  | NA       | NA       | NA       |
| Aminoacid biosynthesis | RNA              | K00640 | cysE             | serine O-acetyltransferase [EC:2.3.1.30]                                             | 117     | 85.3   | 25      | 15     | 0.119   | 1.37 | NA       | NA       | NA       |
| Aminoacid biosynthesis | Transcripts/gene | NA     | cysE             | serine O-acetyltransferase [EC:2.3.1.30]                                             | 0.506   | 0.403  | 0.119   | 0.0498 | 0.136   | 1.25 | NA       | NA       | NA       |
| Aminoacid biosynthesis | DNA              | K00641 | metX             | homoserine O-acetyltransferase [EC:2.3.1.31]                                         | 33.5    | 38.5   | 8.22    | 7.16   | 0.675   | 1.15 | NA       | NA       | NA       |
| Aminoacid biosynthesis | RNA              | K00641 | metX             | homoserine O-acetyltransferase [EC:2.3.1.31]                                         | 6.44    | 7.95   | 1.16    | 2.07   | 0.382   | 1.23 | NA       | NA       | NA       |
| Aminoacid biosynthesis | Transcripts/gene | NA     | metX             | homoserine O-acetyltransferase [EC:2.3.1.31]                                         | 0.201   | 0.214  | 0.0584  | 0.0765 | 0.942   | 1.06 | NA       | NA       | NA       |
| Aminoacid biosynthesis | Transcripts/gene | NA     | argJ             | glutamate N-acetyltransferase / amino-acid N-acetyltransferase [EC:2.3.1.35 2.3.1.1] | 0.502   | 0.428  | 0.132   | 0.0386 | 0.491   | 1.17 | NA       | NA       | NA       |
| Aminoacid biosynthesis | DNA              | K00620 | argJ             | glutamate N-acetyltransferase / amino-acid N-acetyltransferase [EC:2.3.1.35 2.3.1.1] | 136     | 132    | 24      | 30.5   | 1       | 1.03 | NA       | NA       | NA       |
| Aminoacid biosynthesis | RNA              | K00620 | argJ             | glutamate N-acetyltransferase / amino-acid N-acetyltransferase [EC:2.3.1.35 2.3.1.1] | 67.1    | 56.3   | 15.1    | 13.3   | 0.519   | 1.19 | NA       | NA       | NA       |
| Aminoacid biosynthesis | DNA              | K00651 | metA             | homoserine O-succinyltransferase [EC:2.3.1.46]                                       | 172     | 165    | 14.3    | 11.5   | 0.675   | 1.04 | NA       | NA       | NA       |
| Aminoacid biosynthesis | RNA              | K00651 | metA             | homoserine O-succinyltransferase [EC:2.3.1.46]                                       | 126     | 117    | 17.7    | 13.4   | 0.519   | 1.08 | NA       | NA       | NA       |
| Aminoacid biosynthesis | Transcripts/gene | NA     | metA             | homoserine O-succinyltransferase [EC:2.3.1.46]                                       | 0.732   | 0.71   | 0.0864  | 0.0621 | 0.731   | 1.03 | NA       | NA       | NA       |
| Aminoacid biosynthesis | DNA              | K05822 | dapH, dapD       | tetrahydrodipicolinate N-acetyltransferase [EC:2.3.1.89]                             | 5.26    | 2.91   | 2.05    | 0.404  | 0.299   | 1.81 | NA       | NA       | NA       |
| Aminoacid biosynthesis | RNA              | K05822 | dapH, dapD       | tetrahydrodipicolinate N-acetyltransferase [EC:2.3.1.89]                             | 2.36    | 1.2    | 1.12    | 0.362  | 0.0536  | 1.96 | NA       | NA       | NA       |
| Aminoacid biosynthesis | Transcripts/gene | NA     | dapH, dapD       | tetrahydrodipicolinate N-acetyltransferase [EC:2.3.1.8                               |         |        |         |        |         |      |          |          |          |

|                        |                  |        |                  |                                                                                   |         |        |         |        |         |      |         |         |         |
|------------------------|------------------|--------|------------------|-----------------------------------------------------------------------------------|---------|--------|---------|--------|---------|------|---------|---------|---------|
| Aminoacid biosynthesis | Transcripts/gene | NA     | leuA             | 2-isopropylmalate synthase [EC:2.3.3.13]                                          | 0.933   | 0.779  | 0.209   | 0.206  | 0.31    | 1.2  | NA      | NA      | NA      |
| Aminoacid biosynthesis | DNA              | K01655 | LYS20, LYS21     | homocitrate synthase [EC:2.3.3.14]                                                | 5.92    | 8.01   | 2.44    | 1.71   | 0.504   | 1.35 | NA      | NA      | NA      |
| Aminoacid biosynthesis | RNA              | K01655 | LYS20, LYS21     | homocitrate synthase [EC:2.3.3.14]                                                | 1.06    | 1.13   | 0.27    | 0.244  | 0.788   | 1.06 | NA      | NA      | NA      |
| Aminoacid biosynthesis | DNA              | K10977 | aksA             | methanogen homocitrate synthase [EC:2.3.3.14 2.3.3.-]                             | 6.15    | 7.03   | 1.46    | 2.68   | 0.83    | 1.14 | NA      | NA      | NA      |
| Aminoacid biosynthesis | RNA              | K10977 | aksA             | methanogen homocitrate synthase [EC:2.3.3.14 2.3.3.-]                             | 0.28    | 0.884  | 0.151   | 0.593  | 0.121   | 3.16 | NA      | NA      | NA      |
| Aminoacid biosynthesis | Transcripts/gene | NA     | aksA             | methanogen homocitrate synthase [EC:2.3.3.14 2.3.3.-]                             | 0.112   | 0.155  | 0.0191  | 0.105  | 0.636   | 1.38 | NA      | NA      | NA      |
| Aminoacid biosynthesis | DNA              | K00765 | hisG             | ATP phosphoribosyltransferase [EC:2.4.2.17]                                       | 153     | 150    | 14.5    | 7.32   | 0.989   | 1.02 | NA      | NA      | NA      |
| Aminoacid biosynthesis | RNA              | K00765 | hisG             | ATP phosphoribosyltransferase [EC:2.4.2.17]                                       | 110     | 93     | 17.9    | 7.41   | 0.208   | 1.18 | NA      | NA      | NA      |
| Aminoacid biosynthesis | Transcripts/gene | NA     | hisG             | ATP phosphoribosyltransferase [EC:2.4.2.17]                                       | 0.726   | 0.621  | 0.151   | 0.0557 | 0.31    | 1.17 | NA      | NA      | NA      |
| Aminoacid biosynthesis | DNA              | K00766 | trpD             | anthranilate phosphoribosyltransferase [EC:2.4.2.18]                              | 168     | 159    | 18.1    | 9.63   | 0.911   | 1.05 | NA      | NA      | NA      |
| Aminoacid biosynthesis | RNA              | K00766 | trpD             | anthranilate phosphoribosyltransferase [EC:2.4.2.18]                              | 138     | 122    | 44.8    | 50.7   | 0.73    | 1.13 | NA      | NA      | NA      |
| Aminoacid biosynthesis | Transcripts/gene | NA     | trpD             | anthranilate synthase/phosphoribosyltransferase [EC:4.1.3.27 2.4.2.18]            | 0.845   | 0.771  | 0.299   | 0.262  | 0.671   | 1.1  | NA      | NA      | NA      |
| Aminoacid biosynthesis | DNA              | K00772 | mtaP             | 5'-methylthioadenosine phosphorylase [EC:2.4.2.28]                                | 13.7    | 15.5   | 3.87    | 6.71   | 1       | 1.13 | NA      | NA      | NA      |
| Aminoacid biosynthesis | RNA              | K00772 | mtaP             | 5'-methylthioadenosine phosphorylase [EC:2.4.2.28]                                | 3.07    | 7.64   | 0.836   | 5.98   | 0.0406  | 2.49 | NA      | NA      | NA      |
| Aminoacid biosynthesis | Transcripts/gene | NA     | mtaP             | 5'-methylthioadenosine phosphorylase [EC:2.4.2.28]                                | 0.232   | 0.498  | 0.0695  | 0.375  | 0.16    | 2.15 | NA      | NA      | NA      |
| Aminoacid biosynthesis | DNA              | K00797 | speE             | spermidine synthase [EC:2.5.1.16]                                                 | 40.1    | 36.5   | 10.1    | 11     | 0.83    | 1.1  | NA      | NA      | NA      |
| Aminoacid biosynthesis | RNA              | K00797 | speE             | spermidine synthase [EC:2.5.1.16]                                                 | 17.7    | 21     | 6.06    | 5.92   | 0.572   | 1.18 | NA      | NA      | NA      |
| Aminoacid biosynthesis | Transcripts/gene | NA     | speE             | spermidine synthase [EC:2.5.1.16]                                                 | 0.458   | 0.589  | 0.174   | 0.141  | 0.315   | 1.29 | NA      | NA      | NA      |
| Aminoacid biosynthesis | DNA              | K00800 | aroA             | 3-phosphoshikimate 1-carboxyvinyltransferase [EC:2.5.1.19]                        | 261     | 259    | 29.4    | 16.6   | 1       | 1.01 | NA      | NA      | NA      |
| Aminoacid biosynthesis | RNA              | K00800 | aroA             | 3-phosphoshikimate 1-carboxyvinyltransferase [EC:2.5.1.19]                        | 132     | 95.4   | 19.9    | 12.7   | 0.0394  | 1.38 | NA      | NA      | NA      |
| Aminoacid biosynthesis | Transcripts/gene | NA     | aroA             | pentafunctional AROM polypeptide [EC:4.2.3.4.4.2.1.10 1.1.1.25 2.7.1.71 2.5.1.19] | 0.514   | 0.37   | 0.112   | 0.0515 | 0.125   | 1.39 | NA      | NA      | NA      |
| Aminoacid biosynthesis | DNA              | K00802 | SMS              | spermine synthase [EC:2.5.1.22]                                                   | 0.00398 | 0.0023 | 0.00384 | 0.0025 | 1       | 1.72 | NA      | NA      | NA      |
| Aminoacid biosynthesis | RNA              | K00802 | SMS              | spermine synthase [EC:2.5.1.22]                                                   | 0.0153  | 0.0666 | 0.0331  | 0.0483 | 0.228   | 4.34 | NA      | NA      | NA      |
| Aminoacid biosynthesis | Transcripts/gene | NA     | SMS              | spermine synthase [EC:2.5.1.22]                                                   | 2.03    | 3.91   | 3.85    | 7.25   | 0.942   | 1.93 | NA      | NA      | NA      |
| Aminoacid biosynthesis | DNA              | K01738 | cysK             | cysteine synthase A [EC:2.5.1.47]                                                 | 346     | 358    | 48.2    | 39.5   | 0.989   | 1.04 | NA      | NA      | NA      |
| Aminoacid biosynthesis | RNA              | K01738 | cysK             | cysteine synthase A [EC:2.5.1.47]                                                 | 525     | 157    | 766     | 19.7   | 0.344   | 3.35 | NA      | NA      | NA      |
| Aminoacid biosynthesis | DNA              | K12339 | cysM             | cysteine synthase B [EC:2.5.1.47]                                                 | 1.68    | 1.78   | 0.65    | 0.566  | 0.989   | 1.06 | NA      | NA      | NA      |
| Aminoacid biosynthesis | RNA              | K12339 | cysM             | cysteine synthase B [EC:2.5.1.47]                                                 | 0.804   | 0.294  | 0.585   | 0.158  | 0.14    | 2.73 | NA      | NA      | NA      |
| Aminoacid biosynthesis | Transcripts/gene | NA     | cysM             | cysteine synthase B [EC:2.5.1.47]                                                 | 1.64    | 0.439  | 2.64    | 0.0588 | 0.234   | 3.74 | NA      | NA      | NA      |
| Aminoacid biosynthesis | DNA              | K13034 | ATCYSC1          | L-3-cyanoalanine synthase/ cysteine synthase [EC:2.5.1.47 4.4.1.9]                | 0.00811 | 0.0234 | 0.0119  | 0.0188 | 0.45    | 2.89 | NA      | NA      | NA      |
| Aminoacid biosynthesis | DNA              | K01739 | metB             | cystathionine gamma-synthase [EC:2.5.1.48]                                        | 13      | 13.2   | 2.71    | 2.12   | 1       | 1.01 | NA      | NA      | NA      |
| Aminoacid biosynthesis | RNA              | K01739 | metB             | cystathionine gamma-synthase [EC:2.5.1.48]                                        | 22.2    | 9.93   | 10.9    | 3.38   | 0.0252  | 2.23 | NA      | NA      | NA      |
| Aminoacid biosynthesis | Transcripts/gene | NA     | metB             | cystathionine gamma-synthase [EC:2.5.1.48]                                        | 1.77    | 0.767  | 1.04    | 0.275  | 0.097   | 2.31 | NA      | NA      | NA      |
| Aminoacid biosynthesis | DNA              | K01740 | metY             | O-acetylhomoserine (thiol)-lyase [EC:2.5.1.49]                                    | 582     | 580    | 72      | 39.8   | 1       | 1    | NA      | NA      | NA      |
| Aminoacid biosynthesis | RNA              | K01740 | metY             | O-acetylhomoserine (thiol)-lyase [EC:2.5.1.49]                                    | 609     | 241    | 789     | 31.3   | 0.253   | 2.53 | NA      | NA      | NA      |
| Aminoacid biosynthesis | Transcripts/gene | NA     | metY             | O-acetylhomoserine (thiol)-lyase [EC:2.5.1.49]                                    | 1.12    | 0.415  | 1.59    | 0.037  | 0.263   | 2.7  | NA      | NA      | NA      |
| Aminoacid biosynthesis | DNA              | K01626 | aroF, aroG, aroH | 3-deoxy-7-phosphoheptulonate synthase [EC:2.5.1.54]                               | 89.6    | 75.6   | 12.7    | 17.5   | 0.62    | 1.18 | NA      | NA      | NA      |
| Aminoacid biosynthesis | RNA              | K01626 | aroF, aroG, aroH | 3-deoxy-7-phosphoheptulonate synthase [EC:2.5.1.54]                               | 70.4    | 44.1   | 9.22    | 5.12   | 0.00669 | 1.6  | -0.0275 | -0.0135 | -0.0202 |
| Aminoacid biosynthesis | DNA              | K03856 | aroA             | 3-deoxy-7-phosphoheptulonate synthase [EC:2.5.1.54]                               | 53.7    | 68.6   | 11.1    | 20.5   | 0.676   | 1.28 | NA      | NA      | NA      |
| Aminoacid biosynthesis | RNA              | K03856 | aroA             | 3-deoxy-7-phosphoheptulonate synthase [EC:2.5.1.54]                               | 50.7    | 38.6   | 17.2    | 10.1   | 0.253   | 1.31 | NA      | NA      | NA      |
| Aminoacid biosynthesis | Transcripts/gene | NA     | aroA             | 3-deoxy-7-phosphoheptulonate synthase / chorismate mutase [EC:2.5.1.54 5.4.99.5]  | 0.853   | 0.598  | 0.145   | 0.134  | 0.097   | 1.43 | NA      | NA      | NA      |
| Aminoacid biosynthesis | DNA              | K13853 | aroG, aroA       | 3-deoxy-7-phosphoheptulonate synthase / chorismate mutase [EC:2.5.1.54 5.4.99.5]  | 0.135   | 0.381  | 0.036   | 0.39   | 0.033   | 2.82 | NA      | NA      | NA      |
| Aminoacid biosynthesis | RNA              | K13853 | aroG, aroA       | 3-deoxy-7-phosphoheptulonate synthase / chorismate mutase [EC:2.5.1.54 5.4.99.5]  | 0.0766  | 0.443  | 0.0546  | 0.58   | 0.185   | 5.79 | NA      | NA      | NA      |
| Aminoacid biosynthesis | DNA              | K00789 | metK             | S-adenosylmethionine synthetase [EC:2.5.1.6]                                      | 376     | 379    | 25.4    | 16.6   | 1       | 1.01 | NA      | NA      | NA      |
| Aminoacid biosynthesis | RNA              | K00789 | metK             | S-adenosylmethionine synthetase [EC:2.5.1.6]                                      | 334     | 324    | 35      | 31.2   | 0.676   | 1.03 | NA      | NA      | NA      |
| Aminoacid biosynthesis | Transcripts/gene | NA     | metK             | S-adenosylmethionine synthetase [EC:2.5.1.6]                                      | 0.89    | 0.854  | 0.0871  | 0.0858 | 0.636   | 1.04 | NA      | NA      | NA      |
| Aminoacid biosynthesis | DNA              | K00811 | ASP5             | aspartate aminotransferase, chloroplastic [EC:2.6.1.1]                            | 160     | 157    | 33.4    | 15.5   | 0.989   | 1.02 | NA      | NA      | NA      |
| Aminoacid biosynthesis | RNA              | K00811 | ASP5             | aspartate aminotransferase, chloroplastic [EC:2.6.1.1]                            | 171     | 146    | 28      | 21     | 0.256   | 1.17 | NA      | NA      | NA      |
| Aminoacid biosynthesis | DNA              | K00812 | aspB             | aspartate aminotransferase [EC:2.6.1.1]                                           | 186     | 183    | 16.8    | 9.68   | 1       | 1.02 | NA      | NA      | NA      |
| Aminoacid biosynthesis | RNA              | K00812 | aspB             | aspartate aminotransferase [EC:2.6.1.1]                                           | 232     | 189    | 52.2    | 40.7   | 0.312   | 1.22 | NA      | NA      | NA      |
| Aminoacid biosynthesis | DNA              | K00813 | aspC             | aspartate aminotransferase [EC:2.6.1.1]                                           | 8.41    | 9.27   | 2.49    | 3.42   | 1       | 1.1  | NA      | NA      | NA      |
| Aminoacid biosynthesis | RNA              | K00813 | aspC             | aspartate aminotransferase [EC:2.6.1.1]                                           | 2.26    | 2.11   | 0.602   | 0.588  | 0.944   | 1.07 | NA      | NA      | NA      |
| Aminoacid biosynthesis | DNA              | K11358 | yhdR             | aspartate aminotransferase [EC:2.6.1.1]                                           | 103     | 120    | 5.57    | 24     | 0.213   | 1.17 | NA      | NA      | NA      |
| Aminoacid biosynthesis | RNA              | K11358 | yhdR             | aspartate aminotransferase [EC:2.6.1.1]                                           | 59.9    | 67.3   | 10.3    | 14.8   | 0.427   | 1.12 | NA      | NA      | NA      |
| Aminoacid biosynthesis | DNA              | K14454 | GOT1             | aspartate aminotransferase, cytoplasmic [EC:2.6.1.1]                              | 1.28    | 1.12   | 1.03    | 0.364  | 1       | 1.14 | NA      | NA      | NA      |
| Aminoacid biosynthesis | RNA              | K14454 | GOT1             | aspartate aminotransferase, cytoplasmic [EC:2.6.1.1]                              | 0.928   | 1.26   | 0.499   | 0.188  | 0.312   | 1.35 | NA      | NA      | NA      |
| Aminoacid biosynthesis | DNA              | K14455 | GOT2             | aspartate aminotransferase, mitochondrial [EC:2.6.1.1]                            | 4.86    | 3.9    | 3.4     | 1.3    | 1       | 1.25 | NA      | NA      | NA      |
| Aminoacid biosynthesis | RNA              | K14455 | GOT2             | aspartate aminotransferase, mitochondrial [EC:2.6.1.1]                            | 2.89    | 3.32   | 1.9     | 0.635  | 0.472   | 1.15 | NA      | NA      | NA      |
| Aminoacid biosynthesis | Transcripts/gene | NA     | GOT2             | aspartate aminotransferase, mitochondrial [EC:2.6.1.1]                            | 1.02    | 0.864  | 0.206   | 0.101  | 0.31    | 1.18 | NA      | NA      | NA      |
| Aminoacid biosynthesis | DNA              | K00818 | argD             | acetylornithine aminotransferase [EC:2.6.1.11]                                    | 133     | 131    | 17.1    | 15.9   | 1       | 1.02 | NA      | NA      | NA      |
| Aminoacid biosynthesis | RNA              | K00818 | argD             | acetylornithine aminotransferase [EC:2.6.1.11]                                    | 131     | 102    | 35.3    | 19.4   | 0.228   | 1.29 | NA      | NA      | NA      |
| Aminoacid biosynthesis | DNA              | K05830 | lysJ             | acetylornithine/LysW-gamma-L-lysine aminotransferase [EC:2.6.1.11 2.6.1.-]        | 0.0647  | 0.129  | 0.0175  | 0.039  | 0.00856 | 2    | 0.00529 | 0.0199  | 0.0134  |
| Aminoacid biosynthesis | RNA              | K05830 | lysJ             | acetylornithine/LysW-gamma-L-lysine aminotransferase [EC:2.6.1.11 2.6.1.-]        | 0.0348  | 0.0374 | 0.0632  | 0.0615 | 0.944   | 1.07 | NA      | NA      | NA      |
| Aminoacid biosynthesis | Transcripts/gene | NA     | lysJ             | acetylornithine/LysW-gamma-L-lysine aminotransferase [EC:2.6.1.11 2.6.1.-]        | 0.888   | 0.801  | 0.199   | 0.082  | 0.671   | 1.11 | NA      | NA      | NA      |
| Aminoacid biosynthesis | DNA              | K00821 | argD             | acetylornithine/N-succinyldiaminopimelate aminotransferase [EC:2.6.1.11 2.6.1.17] | 122     | 113    | 20.4    | 26.9   | 1       | 1.08 | NA      | NA      | NA      |
| Aminoacid biosynthesis | RNA              | K00821 | argD             | acetylornithine/N-succinyldiaminopimelate aminotransferase [EC:2.6.1.11 2.6.1.17] | 91.5    | 92.7   | 21.6    | 18.1   | 0.895   | 1.01 | NA      | NA      | NA      |
| Aminoacid biosynthesis | DNA              | K14267 | dapC             | N-succinyldiaminopimelate aminotransferase [EC:2.6.1.17]                          | 1.02    | 0.782  | 0.249   | 0.162  | 0.348   | 1.3  | NA      | NA      | NA      |
| Aminoacid biosynthesis | RNA              | K14267 | dapC             | N-succinyldiaminopimelate aminotransferase [EC:2.6.1.17]                          | 0.485   | 0.268  | 0.171   | 0.102  | 0.0788  | 1.81 | NA      | NA      | NA      |
| Aminoacid biosynthesis | Transcripts/gene | NA     | dapC             | N-succinyldiaminopimelate aminotransferase [EC:2.6.1.17]                          | 0.779   | 0.843  | 0.283   | 0.174  | 0.554   | 1.08 | NA      | NA      | NA      |
| Aminoacid biosynthesis | DNA              | K00814 | GPT              | alanine transaminase [EC:2.6.1.2]                                                 | 5.34    | 4.21   | 4.68    | 0.956  | 0.989   | 1.27 | NA      | NA      | NA      |
| Aminoacid biosynthesis | RNA              | K00814 | GPT              | alanine transaminase [EC:2.6.1.2]                                                 | 2.15    | 4.77   | 0.772   | 1.25   | 0.0252  | 2.21 | 0.0153  | 0.0333  | 0.0287  |
| Aminoacid biosynthesis | Transcripts/gene | NA     | alaA             | alanine-synthetizing transaminase [EC:2.6.1.66 2.6.1.2]                           | 0.81    | 0.89   | 0.277   | 0.275  | 0.636   | 1.1  | NA      | NA      | NA      |
| Aminoacid biosynthesis | DNA              | ARO8   | ARO8             | aromatic amino acid aminotransferase I [EC:2.6.1.57 2.6.1.27 2.6.1.5]             | 3.17    | 1.03   | 2.24    | 0.555  | 0.125   | 3.08 | NA      | NA      | NA      |
| Aminoacid biosynthesis | Transcripts/gene | NA     | ARO9             | aromatic amino acid aminotransferase II [EC:2.6.1.58 2.6.1.28]                    | 57.2    | 10.8   | 45.3    | 18.9   | 0.0769  | 5.28 | NA      | NA      | NA      |
| Aminoacid biosynthesis | DNA              | AADAT  | AADAT            | kynurenine/2-aminoadipate aminotransferase [EC:2.6.1.7 2.6.1.39]                  | 1.34    | 1.2    | 1.06    | 0.608  | 0.895   | 1.12 | NA      | NA      | NA      |
| Aminoacid biosynthesis | RNA              | K00826 | ilvE             | branched-chain amino acid aminotransferase [EC:2.6.1.42]                          | 259     | 256    | 21.4    | 14.8   | 1       | 1.01 | NA      | NA      | NA      |
| Aminoacid biosynthesis | DNA              | K00826 | ilvE             | branched-chain amino acid aminotransferase [EC:2.6.1.42]                          | 522     | 460    | 125     | 35.9   | 0.382   | 1.13 | NA      | NA      | NA      |
| Aminoacid biosynthesis | Transcripts/gene | NA     | ilvE             | branched-chain amino acid aminotransferase [EC:2.6.1.42]                          | 2.02    | 1.8    | 0.501   | 0.108  | 0.234   | 1.12 | NA      | NA      | NA      |
| Aminoacid biosynthesis | DNA              | K00815 | TAT              | tyrosine aminotransferase [EC:2.6.1.5]                                            | 0.109   | 0.101  | 0.0593  | 0.0372 | 1       | 1.07 | NA      | NA      | NA      |
| Aminoacid biosynthesis | RNA              | K00815 | TAT              | tyrosine aminotransferase [EC:2.6.1.5]                                            | 0.0652  | 0.0577 | 0.0733  | 0.0592 | 0.944   | 1.13 | NA      | NA      | NA      |
| Aminoacid biosynthesis | Transcripts/gene | NA     | ARO8             | aromatic amino acid aminotransferase I [EC:2.6.1.57 2.6.1.27 2.6.1.5]             | 1.35    | 0.769  | 0.855   | 0.739  | 0.354   | 1.76 | NA      | NA      | NA      |
| Aminoacid biosynthesis | DNA              | K00831 | serC             | phosphoserine aminotransferase [EC:2.6.1.52]                                      | 258     | 260    | 24.5    | 14.6   | 1       | 1.01 | NA      | NA      | NA      |
| Aminoacid biosynthesis | RNA              | K00831 | serC             | phosphoserine aminotransferase [EC:2.6.1.52]                                      | 632     | 577    | 123     | 55.2   | 0.312   | 1.1  | NA      | NA      | NA      |
| Aminoacid biosynthesis | Transcripts/gene | NA     | serC             | phosphoserine aminotransferase [EC:2.6.1.52]                                      | 2.47    | 2.22   | 0.509   | 0.176  | 0.234   | 1.11 | NA      | NA      | NA      |

|                        |                  |        |                |                                                                                            |         |        |         |        |        |      |    |    |    |
|------------------------|------------------|--------|----------------|--------------------------------------------------------------------------------------------|---------|--------|---------|--------|--------|------|----|----|----|
| Aminoacid biosynthesis | DNA              | K00832 | tyrB           | aromatic-amino-acid transaminase [EC:2.6.1.57]                                             | 21.3    | 19.4   | 8.07    | 11     | 0.968  | 1.09 | NA | NA | NA |
| Aminoacid biosynthesis | RNA              | K00832 | tyrB           | aromatic-amino-acid transaminase [EC:2.6.1.57]                                             | 11.3    | 19.5   | 5.46    | 26.9   | 0.424  | 1.72 | NA | NA | NA |
| Aminoacid biosynthesis | Transcripts/gene | NA     | tyrB           | aromatic amino acid aminotransferase I [EC:2.6.1.57 2.6.1.27 2.6.1.5]                      | 0.548   | 0.816  | 0.178   | 0.805  | 0.671  | 1.49 | NA | NA | NA |
| Aminoacid biosynthesis | DNA              | K00838 | ARO8           | aromatic amino acid aminotransferase I [EC:2.6.1.57 2.6.1.27 2.6.1.5]                      | 0.0432  | 0.0398 | 0.018   | 0.0214 | 1      | 1.09 | NA | NA | NA |
| Aminoacid biosynthesis | RNA              | K00838 | ARO8           | aromatic amino acid aminotransferase I [EC:2.6.1.57 2.6.1.27 2.6.1.5]                      | 0.126   | 0.0459 | 0.116   | 0.0325 | 0.142  | 2.76 | NA | NA | NA |
| Aminoacid biosynthesis | DNA              | K05821 | ARO9           | aromatic amino acid aminotransferase II [EC:2.6.1.58 2.6.1.28]                             | 0.00686 | 0.003  | 0.00566 | 0.0052 | 0.563  | 2.29 | NA | NA | NA |
| Aminoacid biosynthesis | RNA              | K05821 | ARO9           | aromatic amino acid aminotransferase II [EC:2.6.1.58 2.6.1.28]                             | 0.39    | 0.194  | 0.352   | 0.0979 | 0.311  | 2.02 | NA | NA | NA |
| Aminoacid biosynthesis | Transcripts/gene | NA     | alaA           | alanine-synthesizing transaminase [EC:2.6.1.66 2.6.1.2]                                    | 0.873   | 0.859  | 0.291   | 0.357  | 0.895  | 1.02 | NA | NA | NA |
| Aminoacid biosynthesis | DNA              | K14260 | alaA           | alanine-synthesizing transaminase [EC:2.6.1.66 2.6.1.2]                                    | 33.2    | 28.4   | 7.69    | 8.82   | 0.779  | 1.17 | NA | NA | NA |
| Aminoacid biosynthesis | RNA              | K14260 | alaA           | alanine-synthesizing transaminase [EC:2.6.1.66 2.6.1.2]                                    | 28.3    | 22.9   | 9.13    | 7.18   | 0.572  | 1.24 | NA | NA | NA |
| Aminoacid biosynthesis | Transcripts/gene | NA     | AADAT          | kynurenine/2-aminoadipate aminotransferase [EC:2.6.1.7 2.6.1.39]                           | 0.91    | 0.842  | 0.513   | 0.344  | 0.958  | 1.08 | NA | NA | NA |
| Aminoacid biosynthesis | DNA              | K00825 | AADAT          | kynurenine/2-aminoadipate aminotransferase [EC:2.6.1.7 2.6.1.39]                           | 0.168   | 0.184  | 0.0784  | 0.0572 | 0.911  | 1.09 | NA | NA | NA |
| Aminoacid biosynthesis | RNA              | K00825 | AADAT          | kynurenine/2-aminoadipate aminotransferase [EC:2.6.1.7 2.6.1.39]                           | 0.191   | 0.219  | 0.106   | 0.14   | 0.944  | 1.14 | NA | NA | NA |
| Aminoacid biosynthesis | DNA              | K00836 | ectB           | diaminobutyrate-2-oxoglutarate transaminase [EC:2.6.1.76]                                  | 11.1    | 10.6   | 8.94    | 2      | 0.394  | 1.05 | NA | NA | NA |
| Aminoacid biosynthesis | RNA              | K00836 | ectB           | diaminobutyrate-2-oxoglutarate transaminase [EC:2.6.1.76]                                  | 10.1    | 7.08   | 10.7    | 1.64   | 0.895  | 1.43 | NA | NA | NA |
| Aminoacid biosynthesis | Transcripts/gene | NA     | ectB           | diaminobutyrate-2-oxoglutarate transaminase [EC:2.6.1.76]                                  | 0.85    | 0.679  | 0.229   | 0.144  | 0.426  | 1.25 | NA | NA | NA |
| Aminoacid biosynthesis | DNA              | K10206 | NA             | LL-diaminopimelate aminotransferase [EC:2.6.1.83]                                          | 242     | 238    | 23      | 21.2   | 1      | 1.02 | NA | NA | NA |
| Aminoacid biosynthesis | RNA              | K10206 | NA             | LL-diaminopimelate aminotransferase [EC:2.6.1.83]                                          | 67.7    | 69.7   | 17.8    | 43.6   | 0.424  | 1.03 | NA | NA | NA |
| Aminoacid biosynthesis | Transcripts/gene | NA     | NA             | LL-diaminopimelate aminotransferase [EC:2.6.1.83]                                          | 0.279   | 0.286  | 0.0588  | 0.161  | 0.426  | 1.02 | NA | NA | NA |
| Aminoacid biosynthesis | DNA              | K00817 | hisC           | histidinol-phosphate aminotransferase [EC:2.6.1.9]                                         | 296     | 291    | 46.5    | 18.1   | 0.968  | 1.02 | NA | NA | NA |
| Aminoacid biosynthesis | RNA              | K00817 | hisC           | histidinol-phosphate aminotransferase [EC:2.6.1.9]                                         | 167     | 132    | 27.2    | 20     | 0.144  | 1.26 | NA | NA | NA |
| Aminoacid biosynthesis | Transcripts/gene | NA     | hisC           | histidinol-phosphate aminotransferase [EC:2.6.1.9]                                         | 0.578   | 0.452  | 0.147   | 0.0523 | 0.155  | 1.28 | NA | NA | NA |
| Aminoacid biosynthesis | DNA              | K00899 | mtnK           | 5-methylthioribose kinase [EC:2.7.1.100]                                                   | 11.2    | 7.71   | 3.08    | 3.24   | 0.399  | 1.45 | NA | NA | NA |
| Aminoacid biosynthesis | RNA              | K00899 | mtnK           | 5-methylthioribose kinase [EC:2.7.1.100]                                                   | 4.52    | 4.37   | 0.942   | 1.65   | 0.895  | 1.04 | NA | NA | NA |
| Aminoacid biosynthesis | Transcripts/gene | NA     | mtnK           | 5-methylthioribose kinase [EC:2.7.1.100]                                                   | 0.426   | 0.625  | 0.129   | 0.25   | 0.382  | 1.47 | NA | NA | NA |
| Aminoacid biosynthesis | DNA              | K00850 | pfkA           | 6-phosphofructokinase I [EC:2.7.1.11]                                                      | 453     | 429    | 49.9    | 55.8   | 0.83   | 1.06 | NA | NA | NA |
| Aminoacid biosynthesis | RNA              | K00850 | pfkA           | 6-phosphofructokinase I [EC:2.7.1.11]                                                      | 807     | 861    | 194     | 263    | 0.97   | 1.07 | NA | NA | NA |
| Aminoacid biosynthesis | Transcripts/gene | NA     | pfkA           | 6-phosphofructokinase I [EC:2.7.1.11]                                                      | 1.81    | 1.99   | 0.515   | 0.458  | 0.636  | 1.1  | NA | NA | NA |
| Aminoacid biosynthesis | DNA              | K00872 | thrB1          | homoserine kinase [EC:2.7.1.39]                                                            | 35.6    | 22     | 11.7    | 9.4    | 0.267  | 1.62 | NA | NA | NA |
| Aminoacid biosynthesis | RNA              | K00872 | thrB1          | homoserine kinase [EC:2.7.1.39]                                                            | 15.2    | 9.51   | 5.77    | 6.38   | 0.283  | 1.6  | NA | NA | NA |
| Aminoacid biosynthesis | DNA              | K02204 | thrB2          | homoserine kinase type II [EC:2.7.1.39]                                                    | 0.279   | 0.449  | 0.0863  | 0.174  | 0.395  | 1.61 | NA | NA | NA |
| Aminoacid biosynthesis | RNA              | K02204 | thrB2          | homoserine kinase type II [EC:2.7.1.39]                                                    | 0.0342  | 0.0874 | 0.0465  | 0.0861 | 0.355  | 2.56 | NA | NA | NA |
| Aminoacid biosynthesis | Transcripts/gene | NA     | thrB2          | homoserine kinase type II [EC:2.7.1.39]                                                    | 0.748   | 0.646  | 0.166   | 0.116  | 0.31   | 1.16 | NA | NA | NA |
| Aminoacid biosynthesis | DNA              | K00873 | pyk            | pyruvate kinase [EC:2.7.1.40]                                                              | 214     | 208    | 31.7    | 31.1   | 1      | 1.03 | NA | NA | NA |
| Aminoacid biosynthesis | RNA              | K00873 | pyk            | pyruvate kinase [EC:2.7.1.40]                                                              | 234     | 170    | 69.4    | 42.9   | 0.139  | 1.38 | NA | NA | NA |
| Aminoacid biosynthesis | DNA              | K12406 | PKLR           | pyruvate kinase isozymes R/L [EC:2.7.1.40]                                                 | 0.0851  | 0.0891 | 0.0491  | 0.0503 | 1      | 1.05 | NA | NA | NA |
| Aminoacid biosynthesis | Transcripts/gene | NA     | pyk            | pyruvate kinase [EC:2.7.1.40]                                                              | 1.09    | 0.813  | 0.203   | 0.141  | 0.125  | 1.33 | NA | NA | NA |
| Aminoacid biosynthesis | DNA              | K00891 | aroK, aroL     | shikimate kinase [EC:2.7.1.71]                                                             | 136     | 129    | 11      | 6.58   | 0.83   | 1.05 | NA | NA | NA |
| Aminoacid biosynthesis | RNA              | K00891 | aroK, aroL     | shikimate kinase [EC:2.7.1.71]                                                             | 40.5    | 31.3   | 7.68    | 4.65   | 0.0988 | 1.3  | NA | NA | NA |
| Aminoacid biosynthesis | Transcripts/gene | NA     | aroK, aroL     | pentafunctional AROM polypeptide [EC:4.2.3.4 4.2.1.10 1.1.1.25 2.7.1.71 2.5.1.19]          | 0.307   | 0.248  | 0.0606  | 0.0411 | 0.155  | 1.23 | NA | NA | NA |
| Aminoacid biosynthesis | DNA              | K13829 | aroKB          | shikimate kinase / 3-dehydroquinate synthase [EC:2.7.1.71 4.2.3.4]                         | 12      | 9.94   | 6.76    | 1.72   | 1      | 1.21 | NA | NA | NA |
| Aminoacid biosynthesis | RNA              | K13829 | aroKB          | shikimate kinase / 3-dehydroquinate synthase [EC:2.7.1.71 4.2.3.4]                         | 4.18    | 3.04   | 1.7     | 1.09   | 0.471  | 1.38 | NA | NA | NA |
| Aminoacid biosynthesis | DNA              | K00931 | proB           | glutamate 5-kinase [EC:2.7.2.11]                                                           | 161     | 154    | 21.5    | 14     | 1      | 1.05 | NA | NA | NA |
| Aminoacid biosynthesis | RNA              | K00931 | proB           | glutamate 5-kinase [EC:2.7.2.11]                                                           | 109     | 83.8   | 18.1    | 18.6   | 0.081  | 1.3  | NA | NA | NA |
| Aminoacid biosynthesis | Transcripts/gene | NA     | proB           | delta-1-pyrroline-5-carboxylate synthetase [EC:2.7.2.11 1.2.1.41]                          | 0.693   | 0.547  | 0.143   | 0.0955 | 0.177  | 1.27 | NA | NA | NA |
| Aminoacid biosynthesis | DNA              | K12657 | ALDH18A1       | delta-1-pyrroline-5-carboxylate synthetase [EC:2.7.2.11 1.2.1.41]                          | 0.164   | 0.182  | 0.0799  | 0.0385 | 0.62   | 1.11 | NA | NA | NA |
| Aminoacid biosynthesis | RNA              | K12657 | ALDH18A1       | delta-1-pyrroline-5-carboxylate synthetase [EC:2.7.2.11 1.2.1.41]                          | 0.597   | 0.413  | 0.309   | 0.16   | 0.344  | 1.44 | NA | NA | NA |
| Aminoacid biosynthesis | DNA              | K00927 | pgk            | phosphoglycerate kinase [EC:2.7.2.3]                                                       | 349     | 359    | 33.1    | 22.4   | 0.989  | 1.03 | NA | NA | NA |
| Aminoacid biosynthesis | RNA              | K00927 | pgk            | phosphoglycerate kinase [EC:2.7.2.3]                                                       | 1670    | 1470   | 277     | 171    | 0.256  | 1.14 | NA | NA | NA |
| Aminoacid biosynthesis | Transcripts/gene | NA     | pgk            | phosphoglycerate kinase [EC:2.7.2.3]                                                       | 4.82    | 4.1    | 0.86    | 0.509  | 0.177  | 1.18 | NA | NA | NA |
| Aminoacid biosynthesis | DNA              | K00928 | lysC           | aspartate kinase [EC:2.7.2.4]                                                              | 333     | 321    | 38.2    | 22.1   | 1      | 1.04 | NA | NA | NA |
| Aminoacid biosynthesis | RNA              | K00928 | lysC           | aspartate kinase [EC:2.7.2.4]                                                              | 282     | 236    | 41.9    | 25.9   | 0.188  | 1.2  | NA | NA | NA |
| Aminoacid biosynthesis | Transcripts/gene | NA     | lysC           | bifunctional diaminopimelate decarboxylase / aspartate kinase [EC:4.1.1.20 2.7.2.4]        | 1.02    | 0.865  | 0.169   | 0.0832 | 0.136  | 1.18 | NA | NA | NA |
| Aminoacid biosynthesis | DNA              | K12524 | thrA           | bifunctional aspartokinase / homoserine dehydrogenase 1 [EC:2.7.2.4 1.1.1.3]               | 225     | 229    | 26.4    | 32.3   | 1      | 1.02 | NA | NA | NA |
| Aminoacid biosynthesis | RNA              | K12524 | thrA           | bifunctional aspartokinase / homoserine dehydrogenase 1 [EC:2.7.2.4 1.1.1.3]               | 284     | 240    | 47.7    | 41.4   | 0.283  | 1.18 | NA | NA | NA |
| Aminoacid biosynthesis | DNA              | K12525 | metL           | bifunctional aspartokinase / homoserine dehydrogenase 2 [EC:2.7.2.4 1.1.1.3]               | 0.538   | 0.381  | 0.586   | 0.15   | 1      | 1.41 | NA | NA | NA |
| Aminoacid biosynthesis | RNA              | K12525 | metL           | bifunctional aspartokinase / homoserine dehydrogenase 2 [EC:2.7.2.4 1.1.1.3]               | 0.1     | 0.0481 | 0.108   | 0.0458 | 0.681  | 2.08 | NA | NA | NA |
| Aminoacid biosynthesis | DNA              | K00930 | argB           | acetylglutamate kinase [EC:2.7.2.8]                                                        | 183     | 177    | 22.1    | 13.2   | 1      | 1.03 | NA | NA | NA |
| Aminoacid biosynthesis | RNA              | K00930 | argB           | acetylglutamate kinase [EC:2.7.2.8]                                                        | 90.9    | 70.6   | 15.5    | 12.2   | 0.189  | 1.29 | NA | NA | NA |
| Aminoacid biosynthesis | Transcripts/gene | NA     | argB           | N-acetyl-gamma-glutamyl-phosphate reductase / acetylglutamate kinase [EC:1.2.1.38 2.7.2.8] | 0.505   | 0.4    | 0.113   | 0.062  | 0.136  | 1.26 | NA | NA | NA |
| Aminoacid biosynthesis | DNA              | K00948 | prsA           | ribose-phosphate pyrophosphokinase [EC:2.7.6.1]                                            | 286     | 292    | 25.3    | 24.4   | 0.938  | 1.02 | NA | NA | NA |
| Aminoacid biosynthesis | RNA              | K00948 | prsA           | ribose-phosphate pyrophosphokinase [EC:2.7.6.1]                                            | 417     | 368    | 65.8    | 15.2   | 0.188  | 1.13 | NA | NA | NA |
| Aminoacid biosynthesis | Transcripts/gene | NA     | prsA           | ribose-phosphate pyrophosphokinase [EC:2.7.6.1]                                            | 1.46    | 1.27   | 0.249   | 0.104  | 0.177  | 1.15 | NA | NA | NA |
| Aminoacid biosynthesis | Transcripts/gene | NA     | sseA           | thiosulfate/3-mercaptopyruvate sulfurtransferase [EC:2.8.1.1 2.8.1.2]                      | 0.0986  | 0.136  | 0.108   | 0.0951 | 0.525  | 1.38 | NA | NA | NA |
| Aminoacid biosynthesis | DNA              | K01011 | sseA           | thiosulfate/3-mercaptopyruvate sulfurtransferase [EC:2.8.1.1 2.8.1.2]                      | 3.3     | 2.6    | 0.803   | 0.43   | 0.563  | 1.27 | NA | NA | NA |
| Aminoacid biosynthesis | RNA              | K01011 | sseA           | thiosulfate/3-mercaptopyruvate sulfurtransferase [EC:2.8.1.1 2.8.1.2]                      | 0.282   | 0.348  | 0.273   | 0.227  | 0.519  | 1.24 | NA | NA | NA |
| Aminoacid biosynthesis | Transcripts/gene | NA     | sseA           | thiosulfate/3-mercaptopyruvate sulfurtransferase [EC:2.8.1.1 2.8.1.2]                      | 0.101   | 0.14   | 0.111   | 0.0981 | 0.525  | 1.39 | NA | NA | NA |
| Aminoacid biosynthesis | Transcripts/gene | NA     | NA             | fructose 1,6-bisphosphate aldolase/phosphatase [EC:4.1.2.13 3.1.3.11]                      | 0.736   | 0.498  | 0.125   | 0.0858 | 0.097  | 1.48 | NA | NA | NA |
| Aminoacid biosynthesis | DNA              | K04486 | NA             | histidinol-phosphatase (PHP family) [EC:3.1.3.15]                                          | 118     | 103    | 18.9    | 27     | 0.875  | 1.14 | NA | NA | NA |
| Aminoacid biosynthesis | RNA              | K04486 | NA             | histidinol-phosphatase (PHP family) [EC:3.1.3.15]                                          | 26.7    | 20.9   | 5.93    | 6.49   | 0.256  | 1.27 | NA | NA | NA |
| Aminoacid biosynthesis | Transcripts/gene | NA     | NA             | histidinol-phosphatase (PHP family) [EC:3.1.3.15]                                          | 0.449   | 0.392  | 0.0715  | 0.058  | 0.274  | 1.15 | NA | NA | NA |
| Aminoacid biosynthesis | DNA              | K01079 | serB           | phosphoserine phosphatase [EC:3.1.3.3]                                                     | 131     | 118    | 19      | 18.8   | 0.731  | 1.11 | NA | NA | NA |
| Aminoacid biosynthesis | RNA              | K01079 | serB           | phosphoserine phosphatase [EC:3.1.3.3]                                                     | 86.5    | 74.9   | 14.7    | 25.7   | 0.519  | 1.15 | NA | NA | NA |
| Aminoacid biosynthesis | Transcripts/gene | NA     | serB           | phosphoserine / homoserine phosphotransferase [EC:3.1.3.3 2.7.1.39]                        | 0.751   | 0.656  | 0.163   | 0.126  | 0.354  | 1.14 | NA | NA | NA |
| Aminoacid biosynthesis | DNA              | K02203 | thrH           | phosphoserine / homoserine phosphotransferase [EC:3.1.3.3 2.7.1.39]                        | 47.8    | 57.2   | 6.66    | 12.7   | 0.293  | 1.2  | NA | NA | NA |
| Aminoacid biosynthesis | RNA              | K02203 | thrH           | phosphoserine / homoserine phosphotransferase [EC:3.1.3.3 2.7.1.39]                        | 45.9    | 40.2   | 11.8    | 7.2    | 0.519  | 1.14 | NA | NA | NA |
| Aminoacid biosynthesis | DNA              | K09880 | mtnC           | enolase-phosphatase E1 [EC:3.1.3.77]                                                       | 0.0287  | 0.0395 | 0.0188  | 0.0193 | 0.779  | 1.37 | NA | NA | NA |
| Aminoacid biosynthesis | DNA              | K08966 | mtnX           | 2-hydroxy-3-keto-5-methylthiopentyl-1-phosphate phosphatase [EC:3.1.3.87]                  | 0.0276  | 0.0547 | 0.0124  | 0.0287 | 0.348  | 1.98 | NA | NA | NA |
| Aminoacid biosynthesis | DNA              | K01244 | MTN            | 5'-methylthioadenosine nucleosidase [EC:3.2.2.16]                                          | 1.97    | 3      | 1.47    | 1.58   | 0.731  | 1.52 | NA | NA | NA |
| Aminoacid biosynthesis | RNA              | K01244 | MTN            | 5'-methylthioadenosine nucleosidase [EC:3.2.2.16]                                          | 0.707   | 0.37   | 0.652   | 0.351  | 0.283  | 1.91 | NA | NA | NA |
| Aminoacid biosynthesis | Transcripts/gene | NA     | MTN            | 5'-methylthioadenosine nucleosidase [EC:3.2.2.16]                                          | 0.39    | 0.126  | 0.186   | 0.0867 | 0.16   | 3.09 | NA | NA | NA |
| Aminoacid biosynthesis | DNA              | K01243 | mtnN, mtn, pfs | S-adenosylhomocysteine 5'-methylthioadenosine nucleosidase [EC:3.2.2.9]                    | 1.24    | 117    | 13.9    | 11.8   | 0.779  | 1.06 | NA | NA | NA |
| Aminoacid biosynthesis | RNA              | K01243 | mtnN, mtn, pfs | S-adenosylhomocysteine 5'-methylthioadenosine nucleosidase [EC:3.2.2.9]                    | 53.7    | 47.5   | 7.55    | 8.25   | 0.283  | 1.13 | NA | NA | NA |
| Aminoacid biosynthesis | Transcripts/gene | NA     | mtnN, mtn, pfs | S-adenosylhomocysteine 5'-methylthioadenosine nucleosidase [EC:3.2.2.9]                    | 0.436   | 0.406  | 0.0712  | 0.0464 | 0.671  | 1.07 | NA | NA | NA |

|                        |                  |        |                |                                                                                                                                        |        |        |         |        |         |      |          |          |         |
|------------------------|------------------|--------|----------------|----------------------------------------------------------------------------------------------------------------------------------------|--------|--------|---------|--------|---------|------|----------|----------|---------|
| Aminoacid biosynthesis | DNA              | K01251 | ahcY           | adenosylhomocysteinease [EC:3.3.1.1]                                                                                                   | 85.9   | 105    | 16.8    | 26.2   | 0.563   | 1.22 | NA       | NA       | NA      |
| Aminoacid biosynthesis | RNA              | K01251 | ahcY           | adenosylhomocysteinease [EC:3.3.1.1]                                                                                                   | 48.6   | 59.5   | 11.2    | 9.38   | 0.129   | 1.22 | NA       | NA       | NA      |
| Aminoacid biosynthesis | Transcripts/gene | NA     | ahcY           | adenosylhomocysteinease [EC:3.3.1.1]                                                                                                   | 0.581  | 0.59   | 0.146   | 0.136  | 1       | 1.02 | NA       | NA       | NA      |
| Aminoacid biosynthesis | DNA              | K14677 | ACY1           | aminoacylase [EC:3.5.1.14]                                                                                                             | 0.0271 | 0.0182 | 0.0138  | 0.0135 | 0.83    | 1.49 | NA       | NA       | NA      |
| Aminoacid biosynthesis | DNA              | K01438 | argE           | acetylornithine deacetylase [EC:3.5.1.16]                                                                                              | 114    | 117    | 13.1    | 15.1   | 1       | 1.03 | NA       | NA       | NA      |
| Aminoacid biosynthesis | RNA              | K01438 | argE           | acetylornithine deacetylase [EC:3.5.1.16]                                                                                              | 54.1   | 48     | 5.12    | 10.3   | 0.424   | 1.13 | NA       | NA       | NA      |
| Aminoacid biosynthesis | Transcripts/gene | NA     | argE           | acetylornithine deacetylase [EC:3.5.1.16]                                                                                              | 0.482  | 0.409  | 0.0726  | 0.0597 | 0.234   | 1.18 | NA       | NA       | NA      |
| Aminoacid biosynthesis | DNA              | K01439 | dapE           | succinyl-diaminopimelate desuccinylase [EC:3.5.1.18]                                                                                   | 91.3   | 70.8   | 19.9    | 14.9   | 0.398   | 1.29 | NA       | NA       | NA      |
| Aminoacid biosynthesis | RNA              | K01439 | dapE           | succinyl-diaminopimelate desuccinylase [EC:3.5.1.18]                                                                                   | 30.4   | 23.1   | 5.42    | 5.27   | 0.16    | 1.32 | NA       | NA       | NA      |
| Aminoacid biosynthesis | Transcripts/gene | NA     | dapE           | succinyl-diaminopimelate desuccinylase [EC:3.5.1.18]                                                                                   | 0.347  | 0.335  | 0.0967  | 0.0772 | 0.838   | 1.03 | NA       | NA       | NA      |
| Aminoacid biosynthesis | DNA              | K01450 | def            | formylmethionine deformylase [EC:3.5.1.31]                                                                                             | 0.0251 | 0.0535 | 0.018   | 0.0427 | 0.62    | 2.13 | NA       | NA       | NA      |
| Aminoacid biosynthesis | DNA              | K05823 | NA             | N-acetyldiaminopimelate deacetylase [EC:3.5.1.47]                                                                                      | 3.57   | 1.74   | 1       | 0.655  | 0.0268  | 2.05 | -0.00998 | -0.00406 | -0.0072 |
| Aminoacid biosynthesis | RNA              | K05823 | NA             | N-acetyldiaminopimelate deacetylase [EC:3.5.1.47]                                                                                      | 0.659  | 0.371  | 0.263   | 0.135  | 0.112   | 1.78 | NA       | NA       | NA      |
| Aminoacid biosynthesis | Transcripts/gene | NA     | NA             | N-acetyldiaminopimelate deacetylase [EC:3.5.1.47]                                                                                      | 0.205  | 0.243  | 0.111   | 0.142  | 0.671   | 1.19 | NA       | NA       | NA      |
| Aminoacid biosynthesis | DNA              | K01476 | rocF, arg      | arginase [EC:3.5.3.1]                                                                                                                  | 13.6   | 13.3   | 2.07    | 2.29   | 1       | 1.02 | NA       | NA       | NA      |
| Aminoacid biosynthesis | RNA              | K01476 | rocF, arg      | arginase [EC:3.5.3.1]                                                                                                                  | 3.67   | 3.77   | 2.32    | 1.14   | 0.676   | 1.03 | NA       | NA       | NA      |
| Aminoacid biosynthesis | Transcripts/gene | NA     | rocF, arg      | arginase [EC:3.5.3.1]                                                                                                                  | 0.278  | 0.285  | 0.171   | 0.085  | 0.426   | 1.03 | NA       | NA       | NA      |
| Aminoacid biosynthesis | DNA              | K01496 | hisI           | phosphoribosyl-AMP cyclohydrolase [EC:3.5.4.19]                                                                                        | 12.4   | 9.54   | 3.58    | 2.13   | 0.62    | 1.3  | NA       | NA       | NA      |
| Aminoacid biosynthesis | RNA              | K01496 | hisI           | phosphoribosyl-AMP cyclohydrolase [EC:3.5.4.19]                                                                                        | 4.12   | 3.57   | 0.924   | 1.06   | 0.383   | 1.16 | NA       | NA       | NA      |
| Aminoacid biosynthesis | Transcripts/gene | NA     | hisI           | phosphoribosyl-ATP pyrophosphohydrolase / phosphoribosyl-AMP cyclohydrolase / histidinol dehydrogenase [EC:3.6.1.31 3.5.4.19 1.1.1.23] | 0.638  | 0.584  | 0.161   | 0.152  | 0.594   | 1.09 | NA       | NA       | NA      |
| Aminoacid biosynthesis | DNA              | K01523 | hisE           | phosphoribosyl-ATP pyrophosphohydrolase [EC:3.6.1.31]                                                                                  | 8.13   | 6.66   | 2.23    | 1.64   | 0.968   | 1.22 | NA       | NA       | NA      |
| Aminoacid biosynthesis | RNA              | K01523 | hisE           | phosphoribosyl-ATP pyrophosphohydrolase [EC:3.6.1.31]                                                                                  | 4.64   | 4.42   | 1.21    | 0.77   | 0.788   | 1.05 | NA       | NA       | NA      |
| Aminoacid biosynthesis | Transcripts/gene | NA     | hisE           | phosphoribosyl-ATP pyrophosphohydrolase / phosphoribosyl-AMP cyclohydrolase / histidinol dehydrogenase [EC:3.6.1.31 3.5.4.19 1.1.1.23] | 0.667  | 0.604  | 0.175   | 0.163  | 0.594   | 1.1  | NA       | NA       | NA      |
| Aminoacid biosynthesis | DNA              | K11755 | hisE           | phosphoribosyl-ATP pyrophosphohydrolase / phosphoribosyl-AMP cyclohydrolase [EC:3.6.1.31 3.5.4.19]                                     | 107    | 115    | 7.87    | 6.96   | 0.511   | 1.08 | NA       | NA       | NA      |
| Aminoacid biosynthesis | RNA              | K11755 | hisE           | phosphoribosyl-ATP pyrophosphohydrolase / phosphoribosyl-AMP cyclohydrolase [EC:3.6.1.31 3.5.4.19]                                     | 70.9   | 69.3   | 15.1    | 21.1   | 0.731   | 1.02 | NA       | NA       | NA      |
| Aminoacid biosynthesis | DNA              | K14152 | HIS4           | phosphoribosyl-ATP pyrophosphohydrolase / phosphoribosyl-AMP cyclohydrolase / histidinol dehydrogenase [EC:3.6.1.31 3.5.4.19 1.1.1.23] | 0.0601 | 0.0554 | 0.0364  | 0.0288 | 1       | 1.09 | NA       | NA       | NA      |
| Aminoacid biosynthesis | RNA              | K14152 | HIS4           | phosphoribosyl-ATP pyrophosphohydrolase / phosphoribosyl-AMP cyclohydrolase / histidinol dehydrogenase [EC:3.6.1.31 3.5.4.19 1.1.1.23] | 0.195  | 0.239  | 0.162   | 0.123  | 0.471   | 1.22 | NA       | NA       | NA      |
| Aminoacid biosynthesis | DNA              | K09758 | asdA           | aspartate 4-decarboxylase [EC:4.1.1.12]                                                                                                | 3.99   | 5.87   | 1.54    | 1.98   | 0.383   | 1.47 | NA       | NA       | NA      |
| Aminoacid biosynthesis | RNA              | K09758 | asdA           | aspartate 4-decarboxylase [EC:4.1.1.12]                                                                                                | 0.897  | 1.37   | 0.183   | 0.426  | 0.207   | 1.52 | NA       | NA       | NA      |
| Aminoacid biosynthesis | Transcripts/gene | NA     | asdA           | aspartate 4-decarboxylase [EC:4.1.1.12]                                                                                                | 0.253  | 0.257  | 0.0979  | 0.125  | 0.838   | 1.02 | NA       | NA       | NA      |
| Aminoacid biosynthesis | DNA              | K01586 | lysA           | diaminopimelate decarboxylase [EC:4.1.1.20]                                                                                            | 324    | 320    | 23.1    | 20.9   | 1       | 1.01 | NA       | NA       | NA      |
| Aminoacid biosynthesis | RNA              | K01586 | lysA           | diaminopimelate decarboxylase [EC:4.1.1.20]                                                                                            | 231    | 172    | 40.8    | 34.9   | 0.124   | 1.34 | NA       | NA       | NA      |
| Aminoacid biosynthesis | Transcripts/gene | NA     | lysA           | diaminopimelate decarboxylase / aspartate kinase [EC:4.1.1.20 2.7.2.4]                                                                 | 0.716  | 0.537  | 0.137   | 0.0945 | 0.125   | 1.33 | NA       | NA       | NA      |
| Aminoacid biosynthesis | DNA              | K12526 | lysAC          | bifunctional diaminopimelate decarboxylase / aspartate kinase [EC:4.1.1.20 2.7.2.4]                                                    | 0.0507 | 0.0816 | 0.0303  | 0.0347 | 0.45    | 1.61 | NA       | NA       | NA      |
| Aminoacid biosynthesis | RNA              | K12526 | lysAC          | bifunctional diaminopimelate decarboxylase / aspartate kinase [EC:4.1.1.20 2.7.2.4]                                                    | 0.0611 | 0.0699 | 0.0634  | 0.0519 | 0.895   | 1.14 | NA       | NA       | NA      |
| Aminoacid biosynthesis | DNA              | K01609 | trpC           | indole-3-glycerol phosphate synthase [EC:4.1.1.48]                                                                                     | 115    | 110    | 10.8    | 6.07   | 0.989   | 1.04 | NA       | NA       | NA      |
| Aminoacid biosynthesis | RNA              | K01609 | trpC           | indole-3-glycerol phosphate synthase [EC:4.1.1.48]                                                                                     | 70.9   | 66.1   | 18.4    | 22.1   | 0.73    | 1.07 | NA       | NA       | NA      |
| Aminoacid biosynthesis | Transcripts/gene | NA     | trpC           | anthranilate synthase / indole-3-glycerol phosphate synthase / phosphoribosylanthranilate isomerase [EC:4.1.3.27 4.1.1.48 5.3.1.24]    | 0.594  | 0.576  | 0.18    | 0.161  | 0.785   | 1.03 | NA       | NA       | NA      |
| Aminoacid biosynthesis | DNA              | K13498 | trpCF          | indole-3-glycerol phosphate synthase / phosphoribosylanthranilate isomerase [EC:4.1.1.48 5.3.1.24]                                     | 10     | 7.4    | 5.07    | 2.03   | 0.83    | 1.36 | NA       | NA       | NA      |
| Aminoacid biosynthesis | RNA              | K13498 | trpCF          | indole-3-glycerol phosphate synthase / phosphoribosylanthranilate isomerase [EC:4.1.1.48 5.3.1.24]                                     | 2.04   | 2.09   | 1.32    | 0.404  | 0.572   | 1.03 | NA       | NA       | NA      |
| Aminoacid biosynthesis | DNA              | K01611 | speD           | S-adenosylmethionine decarboxylase [EC:4.1.1.50]                                                                                       | 9      | 7.16   | 6.1     | 2.61   | 1       | 1.26 | NA       | NA       | NA      |
| Aminoacid biosynthesis | RNA              | K01611 | speD           | S-adenosylmethionine decarboxylase [EC:4.1.1.50]                                                                                       | 8.39   | 7.17   | 4.49    | 2.81   | 0.895   | 1.17 | NA       | NA       | NA      |
| Aminoacid biosynthesis | Transcripts/gene | NA     | speD           | S-adenosylmethionine decarboxylase [EC:4.1.1.50]                                                                                       | 1.12   | 1.01   | 0.621   | 0.24   | 0.983   | 1.11 | NA       | NA       | NA      |
| Aminoacid biosynthesis | DNA              | K01623 | ALDO           | fructose-bisphosphate aldolase, class I [EC:4.1.2.13]                                                                                  | 17.5   | 16.8   | 2.77    | 4.46   | 1       | 1.04 | NA       | NA       | NA      |
| Aminoacid biosynthesis | RNA              | K01623 | ALDO           | fructose-bisphosphate aldolase, class I [EC:4.1.2.13]                                                                                  | 15.7   | 13.4   | 3.91    | 3.99   | 0.519   | 1.18 | NA       | NA       | NA      |
| Aminoacid biosynthesis | DNA              | K01624 | fbaA           | fructose-bisphosphate aldolase, class II [EC:4.1.2.13]                                                                                 | 340    | 329    | 40.4    | 21.4   | 1       | 1.03 | NA       | NA       | NA      |
| Aminoacid biosynthesis | RNA              | K01624 | fbaA           | fructose-bisphosphate aldolase, class II [EC:4.1.2.13]                                                                                 | 2890   | 2050   | 780     | 356    | 0.141   | 1.41 | NA       | NA       | NA      |
| Aminoacid biosynthesis | Transcripts/gene | NA     | fbaA           | fructose-bisphosphate aldolase, class II [EC:4.1.2.13]                                                                                 | 7.99   | 5.85   | 1.83    | 0.836  | 0.125   | 1.37 | NA       | NA       | NA      |
| Aminoacid biosynthesis | DNA              | K01622 | NA             | fructose 1,6-bisphosphate aldolase/phosphatase [EC:4.1.2.13 3.1.3.11]                                                                  | 7.49   | 8.4    | 1.66    | 2.82   | 0.875   | 1.12 | NA       | NA       | NA      |
| Aminoacid biosynthesis | RNA              | K01622 | NA             | fructose 1,6-bisphosphate aldolase/phosphatase [EC:4.1.2.13 3.1.3.11]                                                                  | 4.52   | 11.3   | 2.91    | 4.82   | 0.101   | 2.51 | NA       | NA       | NA      |
| Aminoacid biosynthesis | DNA              | K08093 | hxlA           | 3-hexulose-6-phosphate synthase [EC:4.1.2.43]                                                                                          | 6.43   | 5.88   | 1.73    | 2.4    | 1       | 1.09 | NA       | NA       | NA      |
| Aminoacid biosynthesis | RNA              | K08093 | hxlA           | bifunctional enzyme Fae/Hps [EC:4.3.--.4.1.2.43]                                                                                       | 9.57   | 9.9    | 2.39    | 4.05   | 1       | 1.03 | NA       | NA       | NA      |
| Aminoacid biosynthesis | DNA              | K08093 | hxlA           | 3-hexulose-6-phosphate synthase [EC:4.1.2.43]                                                                                          | 0.777  | 0.761  | 0.653   | 0.258  | 0.944   | 1.02 | NA       | NA       | NA      |
| Aminoacid biosynthesis | RNA              | K13812 | fae-hps        | bifunctional enzyme Fae/Hps [EC:4.3.--.4.1.2.43]                                                                                       | 1.73   | 5.79   | 1.47    | 4.44   | 0.0729  | 3.36 | NA       | NA       | NA      |
| Aminoacid biosynthesis | Transcripts/gene | NA     | hps-phi        | 3-hexulose-6-phosphate synthase / 6-phospho-3-hexuloisomerase [EC:4.1.2.43 5.3.1.27]                                                   | 0.164  | 0.571  | 0.0838  | 0.848  | 0.136   | 3.49 | NA       | NA       | NA      |
| Aminoacid biosynthesis | DNA              | K13831 | hps-phi        | 3-hexulose-6-phosphate synthase / 6-phospho-3-hexuloisomerase [EC:4.1.2.43 5.3.1.27]                                                   | 2.04   | 3.16   | 0.482   | 0.562  | 0.019   | 1.55 | NA       | NA       | NA      |
| Aminoacid biosynthesis | RNA              | K13831 | hps-phi        | 3-hexulose-6-phosphate synthase / 6-phospho-3-hexuloisomerase [EC:4.1.2.43 5.3.1.27]                                                   | 0.308  | 0.44   | 0.128   | 0.158  | 0.228   | 1.43 | NA       | NA       | NA      |
| Aminoacid biosynthesis | DNA              | K01620 | taeE           | threonine aldolase [EC:4.1.2.5]                                                                                                        | 197    | 182    | 17.3    | 14.2   | 0.402   | 1.08 | NA       | NA       | NA      |
| Aminoacid biosynthesis | RNA              | K01620 | taeE           | threonine aldolase [EC:4.1.2.5]                                                                                                        | 93.5   | 74.6   | 7.08    | 13.5   | 0.068   | 1.25 | NA       | NA       | NA      |
| Aminoacid biosynthesis | Transcripts/gene | NA     | taeE           | threonine aldolase [EC:4.1.2.5]                                                                                                        | 0.477  | 0.415  | 0.0456  | 0.102  | 0.408   | 1.15 | NA       | NA       | NA      |
| Aminoacid biosynthesis | DNA              | K01657 | trpE           | anthranilate synthase component I [EC:4.1.3.27]                                                                                        | 216    | 197    | 24.8    | 15.6   | 0.45    | 1.1  | NA       | NA       | NA      |
| Aminoacid biosynthesis | RNA              | K01657 | trpE           | anthranilate synthase component I [EC:4.1.3.27]                                                                                        | 141    | 147    | 42      | 62.9   | 0.944   | 1.04 | NA       | NA       | NA      |
| Aminoacid biosynthesis | DNA              | K01658 | trpG           | anthranilate synthase component II [EC:4.1.3.27]                                                                                       | 89     | 81.4   | 9.69    | 6.45   | 0.504   | 1.09 | NA       | NA       | NA      |
| Aminoacid biosynthesis | RNA              | K01658 | trpG           | anthranilate synthase component II [EC:4.1.3.27]                                                                                       | 50.2   | 52.4   | 16.4    | 22.1   | 1       | 1.04 | NA       | NA       | NA      |
| Aminoacid biosynthesis | DNA              | K13503 | trpEG          | anthranilate synthase [EC:4.1.3.27]                                                                                                    | 0.0166 | 0.0263 | 0.00744 | 0.009  | 0.46    | 1.59 | NA       | NA       | NA      |
| Aminoacid biosynthesis | Transcripts/gene | NA     | TRP1           | anthranilate synthase / indole-3-glycerol phosphate synthase / phosphoribosylanthranilate isomerase [EC:4.1.3.27 4.1.1.48 5.3.1.24]    | 0.656  | 0.717  | 0.223   | 0.235  | 0.785   | 1.09 | NA       | NA       | NA      |
| Aminoacid biosynthesis | DNA              | K13497 | trpGD          | anthranilate synthase/phosphoribosyltransferase [EC:4.1.3.27 2.4.2.18]                                                                 | 15.2   | 11     | 7.57    | 3.14   | 0.938   | 1.38 | NA       | NA       | NA      |
| Aminoacid biosynthesis | RNA              | K13497 | trpGD          | anthranilate synthase/phosphoribosyltransferase [EC:4.1.3.27 2.4.2.18]                                                                 | 14.5   | 10.7   | 10.9    | 3.28   | 1       | 1.36 | NA       | NA       | NA      |
| Aminoacid biosynthesis | DNA              | K01656 | TRP3           | anthranilate synthase / indole-3-glycerol phosphate synthase [EC:4.1.3.27 4.1.1.48]                                                    | 0.12   | 0.124  | 0.048   | 0.0847 | 0.989   | 1.03 | NA       | NA       | NA      |
| Aminoacid biosynthesis | RNA              | K01656 | TRP3           | anthranilate synthase / indole-3-glycerol phosphate synthase [EC:4.1.3.27 4.1.1.48]                                                    | 0.0505 | 0.0637 | 0.0361  | 0.0601 | 0.841   | 1.26 | NA       | NA       | NA      |
| Aminoacid biosynthesis | DNA              | K13501 | TRP1           | anthranilate synthase / indole-3-glycerol phosphate synthase / phosphoribosylanthranilate isomerase [EC:4.1.3.27 4.1.1.48 5.3.1.24]    | 0.0918 | 0.0748 | 0.0315  | 0.0228 | 0.732   | 1.23 | NA       | NA       | NA      |
| Aminoacid biosynthesis | RNA              | K13501 | TRP1           | anthranilate synthase / indole-3-glycerol phosphate synthase / phosphoribosylanthranilate isomerase [EC:4.1.3.27 4.1.1.48 5.3.1.24]    | 0.148  | 0.219  | 0.04    | 0.135  | 0.731   | 1.48 | NA       | NA       | NA      |
| Aminoacid biosynthesis | DNA              | K03785 | aroD           | 3-dehydroquinate dehydratase I [EC:4.2.1.10]                                                                                           | 39.8   | 27.9   | 8.98    | 7.7    | 0.0484  | 1.43 | NA       | NA       | NA      |
| Aminoacid biosynthesis | RNA              | K03785 | aroD           | 3-dehydroquinate dehydratase I [EC:4.2.1.10]                                                                                           | 6.89   | 3.13   | 1.49    | 0.625  | 0.00669 | 2.2  | -0.0248  | -0.0108  | -0.0172 |
| Aminoacid biosynthesis | DNA              | K03786 | aroQ, qutE     | 3-dehydroquinate dehydratase II [EC:4.2.1.10]                                                                                          | 84.3   | 88.2   | 8.06    | 5.8    | 0.911   | 1.05 | NA       | NA       | NA      |
| Aminoacid biosynthesis | RNA              | K03786 | aroQ, qutE     | 3-dehydroquinate dehydratase II [EC:4.2.1.10]                                                                                          | 55.1   | 46.7   | 8.36    | 4.72   | 0.121   | 1.18 | NA       | NA       | NA      |
| Aminoacid biosynthesis | Transcripts/gene | NA     | aroQ, qutE     | 3-dehydroquinate dehydratase / shikimate dehydrogenase [EC:4.2.1.10 1.1.1.25]                                                          | 0.49   | 0.423  | 0.0616  | 0.0509 | 0.136   | 1.16 | NA       | NA       | NA      |
| Aminoacid biosynthesis | DNA              | K13832 | aroDE, DHQ-SDH | 3-dehydroquinate dehydratase / shikimate dehydrogenase [EC:4.2.1.10 1.1.1.25]                                                          | 6.8    | 6.56   | 1.69    | 2.78   | 0.938   | 1.04 | NA       | NA       | NA      |
| Aminoacid biosynthesis | RNA              | K13832 | aroDE, DHQ-SDH | 3-dehydroquinate dehydratase / shikimate dehydrogenase [EC:4.2.1.10 1.1.1.25]                                                          | 1.83   | 1.81   | 1.05    | 1.15   | 1       | 1.01 | NA       | NA       | NA      |
| Aminoacid biosynthesis | DNA              | K08964 | mttB           | methylthioribulose-1-phosphate dehydratase [EC:4.2.1.109]                                                                              | 0.0466 | 0.0698 | 0.033   | 0.0268 | 0.779   | 1.5  | NA       | NA       | NA      |
| Aminoacid biosynthesis | DNA              | K01689 | eno            | enolase [EC:4.2.1.11]                                                                                                                  | 269    | 241    | 32.5    | 30.3   | 0.45    | 1.12 | NA       | NA       | NA      |
| Aminoacid biosynthesis | RNA              | K01689 | eno            | enolase [EC:4.2.1.11]                                                                                                                  | 1300   | 1260   | 322     | 642    | 0.623   | 1.04 | NA       | NA       | NA      |
| Aminoacid biosynthesis | Transcripts/gene | NA     | eno            | enolase [EC:4.2.1.11]                                                                                                                  | 4.86   | 5.08   | 1.25    | 2.12   | 0.731   | 1.04 | NA       | NA       | NA      |
| Aminoacid biosynthesis | DNA              | K01693 | hisB           | imidazoleglycerol-phosphate dehydratase [EC:4.2.1.19]                                                                                  | 68.7   | 66.8   | 11.8    | 15.7   | 1       | 1.03 | NA       | NA       | NA      |

|                        |                  |        |            |                                                                                         |         |        |         |        |        |      |         |          |         |
|------------------------|------------------|--------|------------|-----------------------------------------------------------------------------------------|---------|--------|---------|--------|--------|------|---------|----------|---------|
| Aminoacid biosynthesis | RNA              | K01693 | hisB       | imidazoleglycerol-phosphate dehydratase [EC:4.2.1.19]                                   | 36.5    | 30.4   | 5.61    | 4.69   | 0.138  | 1.2  | NA      | NA       | NA      |
| Aminoacid biosynthesis | Transcripts/gene | NA     | hisB       | imidazoleglycerol-phosphate dehydratase [EC:4.2.1.19]                                   | 0.658   | 0.541  | 0.11    | 0.0459 | 0.136  | 1.22 | NA      | NA       | NA      |
| Aminoacid biosynthesis | DNA              | K01089 | hisB       | imidazoleglycerol-phosphate dehydratase / histidinol-phosphatase [EC:4.2.1.19 3.1.3.15] | 87.6    | 90.2   | 10.9    | 16.4   | 1      | 1.03 | NA      | NA       | NA      |
| Aminoacid biosynthesis | RNA              | K01089 | hisB       | imidazoleglycerol-phosphate dehydratase / histidinol-phosphatase [EC:4.2.1.19 3.1.3.15] | 65.2    | 54.6   | 9.95    | 12.8   | 0.253  | 1.19 | NA      | NA       | NA      |
| Aminoacid biosynthesis | DNA              | K01694 | TRP        | tryptophan synthase [EC:4.2.1.20]                                                       | 0.149   | 0.21   | 0.0432  | 0.0848 | 0.455  | 1.41 | NA      | NA       | NA      |
| Aminoacid biosynthesis | RNA              | K01694 | TRP        | tryptophan synthase [EC:4.2.1.20]                                                       | 0.35    | 0.349  | 0.248   | 0.21   | 0.944  | 1    | NA      | NA       | NA      |
| Aminoacid biosynthesis | DNA              | K01695 | trpA       | tryptophan synthase alpha chain [EC:4.2.1.20]                                           | 132     | 126    | 15      | 8.2    | 0.938  | 1.05 | NA      | NA       | NA      |
| Aminoacid biosynthesis | RNA              | K01695 | trpA       | tryptophan synthase alpha chain [EC:4.2.1.20]                                           | 87.7    | 88.1   | 27.1    | 23.5   | 1      | 1    | NA      | NA       | NA      |
| Aminoacid biosynthesis | DNA              | K01696 | trpB       | tryptophan synthase beta chain [EC:4.2.1.20]                                            | 218     | 213    | 19.7    | 16.2   | 1      | 1.02 | NA      | NA       | NA      |
| Aminoacid biosynthesis | RNA              | K01696 | trpB       | tryptophan synthase beta chain [EC:4.2.1.20]                                            | 177     | 181    | 48      | 55.1   | 1      | 1.02 | NA      | NA       | NA      |
| Aminoacid biosynthesis | DNA              | K06001 | trpB       | tryptophan synthase beta chain [EC:4.2.1.20]                                            | 253     | 293    | 17.9    | 19.3   | 0.0717 | 1.16 | NA      | NA       | NA      |
| Aminoacid biosynthesis | RNA              | K06001 | trpB       | tryptophan synthase beta chain [EC:4.2.1.20]                                            | 565     | 432    | 201     | 91.1   | 0.344  | 1.31 | NA      | NA       | NA      |
| Aminoacid biosynthesis | Transcripts/gene | NA     | trpB       | tryptophan synthase beta chain [EC:4.2.1.20]                                            | 1.4     | 1.11   | 0.475   | 0.233  | 0.426  | 1.26 | NA      | NA       | NA      |
| Aminoacid biosynthesis | DNA              | K01697 | CBS        | cystathionine beta-synthase [EC:4.2.1.22]                                               | 5.17    | 8.92   | 1.55    | 2.78   | 0.299  | 1.73 | NA      | NA       | NA      |
| Aminoacid biosynthesis | RNA              | K01697 | CBS        | cystathionine beta-synthase [EC:4.2.1.22]                                               | 4.21    | 5.05   | 1.66    | 1.13   | 0.424  | 1.2  | NA      | NA       | NA      |
| Aminoacid biosynthesis | Transcripts/gene | NA     | CBS        | cystathionine beta-synthase [EC:4.2.1.22]                                               | 0.881   | 0.611  | 0.452   | 0.226  | 0.426  | 1.44 | NA      | NA       | NA      |
| Aminoacid biosynthesis | DNA              | K01681 | acnA       | aconitate hydratase [EC:4.2.1.3]                                                        | 282     | 283    | 42.1    | 65.7   | 1      | 1    | NA      | NA       | NA      |
| Aminoacid biosynthesis | RNA              | K01681 | acnA       | aconitate hydratase [EC:4.2.1.3]                                                        | 240     | 196    | 52.8    | 40.3   | 0.254  | 1.22 | NA      | NA       | NA      |
| Aminoacid biosynthesis | Transcripts/gene | NA     | acnA       | aconitate hydratase 2 / 2-methylisocitrate dehydratase [EC:4.2.1.3 4.2.1.99]            | 0.88    | 0.724  | 0.28    | 0.187  | 0.426  | 1.21 | NA      | NA       | NA      |
| Aminoacid biosynthesis | DNA              | K01682 | acnB       | aconitate hydratase 2 / 2-methylisocitrate dehydratase [EC:4.2.1.3 4.2.1.99]            | 1.06    | 1.18   | 0.432   | 0.592  | 1      | 1.12 | NA      | NA       | NA      |
| Aminoacid biosynthesis | RNA              | K01682 | acnB       | aconitate hydratase 2 / 2-methylisocitrate dehydratase [EC:4.2.1.3 4.2.1.99]            | 1.68    | 1.07   | 0.563   | 0.78   | 0.311  | 1.57 | NA      | NA       | NA      |
| Aminoacid biosynthesis | DNA              | K01702 | LEU1       | 3-isopropylmalate dehydratase [EC:4.2.1.33]                                             | 0.0412  | 0.0192 | 0.0228  | 0.0158 | 0.252  | 2.15 | NA      | NA       | NA      |
| Aminoacid biosynthesis | RNA              | K01702 | LEU1       | 3-isopropylmalate dehydratase [EC:4.2.1.33]                                             | 0.0739  | 0.0209 | 0.072   | 0.0382 | 0.151  | 3.54 | NA      | NA       | NA      |
| Aminoacid biosynthesis | Transcripts/gene | NA     | leuD       | 3-isopropylmalate/(R)-2-methylmalate dehydratase small subunit [EC:4.2.1.33 4.2.1.35]   | 1.11    | 0.962  | 0.272   | 0.216  | 0.426  | 1.15 | NA      | NA       | NA      |
| Aminoacid biosynthesis | DNA              | K01703 | leuC       | 3-isopropylmalate/(R)-2-methylmalate dehydratase large subunit [EC:4.2.1.33 4.2.1.35]   | 264     | 236    | 26.3    | 21.9   | 0.346  | 1.12 | NA      | NA       | NA      |
| Aminoacid biosynthesis | RNA              | K01703 | leuC       | 3-isopropylmalate/(R)-2-methylmalate dehydratase large subunit [EC:4.2.1.33 4.2.1.35]   | 295     | 227    | 67.7    | 49.2   | 0.207  | 1.3  | NA      | NA       | NA      |
| Aminoacid biosynthesis | DNA              | K01704 | leuD       | 3-isopropylmalate/(R)-2-methylmalate dehydratase small subunit [EC:4.2.1.33 4.2.1.35]   | 104     | 92.6   | 10.2    | 5.78   | 0.255  | 1.12 | NA      | NA       | NA      |
| Aminoacid biosynthesis | RNA              | K01704 | leuD       | 3-isopropylmalate/(R)-2-methylmalate dehydratase small subunit [EC:4.2.1.33 4.2.1.35]   | 108     | 87.7   | 24.2    | 20.1   | 0.283  | 1.23 | NA      | NA       | NA      |
| Aminoacid biosynthesis | Transcripts/gene | NA     | leuD       | 3-isopropylmalate/(R)-2-methylmalate dehydratase small subunit [EC:4.2.1.33 4.2.1.35]   | 1.11    | 0.962  | 0.274   | 0.216  | 0.426  | 1.15 | NA      | NA       | NA      |
| Aminoacid biosynthesis | DNA              | K01705 | LYS4       | homoaconitate hydratase [EC:4.2.1.36]                                                   | 0.462   | 0.389  | 0.103   | 0.177  | 0.911  | 1.19 | NA      | NA       | NA      |
| Aminoacid biosynthesis | RNA              | K01705 | LYS4       | homoaconitate hydratase [EC:4.2.1.36]                                                   | 0.177   | 0.293  | 0.116   | 0.287  | 0.572  | 1.65 | NA      | NA       | NA      |
| Aminoacid biosynthesis | Transcripts/gene | NA     | LYS4       | homoaconitate hydratase [EC:4.2.1.36]                                                   | 0.44    | 0.853  | 0.382   | 1.07   | 0.671  | 1.94 | NA      | NA       | NA      |
| Aminoacid biosynthesis | DNA              | K04518 | pheA2      | prephenate dehydratase [EC:4.2.1.51]                                                    | 109     | 109    | 9.98    | 8.78   | 1      | 1    | NA      | NA       | NA      |
| Aminoacid biosynthesis | RNA              | K04518 | pheA2      | prephenate dehydratase [EC:4.2.1.51]                                                    | 99.7    | 55.9   | 35      | 22.7   | 0.113  | 1.78 | NA      | NA       | NA      |
| Aminoacid biosynthesis | Transcripts/gene | NA     | pheA2      | chorismate mutase / prephenate dehydratase [EC:5.4.99.5 4.2.1.51]                       | 0.607   | 0.367  | 0.172   | 0.0883 | 0.097  | 1.65 | NA      | NA       | NA      |
| Aminoacid biosynthesis | DNA              | K01713 | pheC       | cyclohexadienyl dehydratase [EC:4.2.1.51 4.2.1.91]                                      | 72.3    | 73.5   | 13      | 14.3   | 1      | 1.02 | NA      | NA       | NA      |
| Aminoacid biosynthesis | RNA              | K01713 | pheC       | cyclohexadienyl dehydratase [EC:4.2.1.51 4.2.1.91]                                      | 24.3    | 20.8   | 9.35    | 5.31   | 0.843  | 1.17 | NA      | NA       | NA      |
| Aminoacid biosynthesis | DNA              | K01687 | ilvD       | dihydroxy-acid dehydratase [EC:4.2.1.9]                                                 | 364     | 332    | 46.8    | 28.3   | 0.779  | 1.1  | NA      | NA       | NA      |
| Aminoacid biosynthesis | RNA              | K01687 | ilvD       | dihydroxy-acid dehydratase [EC:4.2.1.9]                                                 | 453     | 304    | 81.9    | 29.2   | 0.0269 | 1.49 | -0.0221 | -0.0056  | -0.0114 |
| Aminoacid biosynthesis | Transcripts/gene | NA     | ilvD       | dihydroxy-acid dehydratase [EC:4.2.1.9]                                                 | 1.27    | 0.92   | 0.294   | 0.12   | 0.097  | 1.38 | NA      | NA       | NA      |
| Aminoacid biosynthesis | Transcripts/gene | NA     | pheC       | cyclohexadienyl dehydratase [EC:4.2.1.51 4.2.1.91]                                      | 0.344   | 0.283  | 0.139   | 0.0515 | 0.636  | 1.22 | NA      | NA       | NA      |
| Aminoacid biosynthesis | Transcripts/gene | NA     | NA         | aconitate hydratase 2 / 2-methylisocitrate dehydratase [EC:4.2.1.3 4.2.1.99]            | 1.92    | 0.898  | 1.22    | 0.44   | 0.177  | 2.14 | NA      | NA       | NA      |
| Aminoacid biosynthesis | DNA              | K01733 | thrC       | threonine synthase [EC:4.2.3.1]                                                         | 302     | 308    | 33.6    | 26.5   | 1      | 1.02 | NA      | NA       | NA      |
| Aminoacid biosynthesis | RNA              | K01733 | thrC       | threonine synthase [EC:4.2.3.1]                                                         | 269     | 221    | 39.8    | 30.7   | 0.167  | 1.22 | NA      | NA       | NA      |
| Aminoacid biosynthesis | Transcripts/gene | NA     | thrC       | threonine synthase [EC:4.2.3.1]                                                         | 0.901   | 0.721  | 0.183   | 0.102  | 0.136  | 1.25 | NA      | NA       | NA      |
| Aminoacid biosynthesis | DNA              | K01735 | aroB       | 3-dehydroquinate synthase [EC:4.2.3.4]                                                  | 201     | 195    | 19.4    | 8.83   | 0.875  | 1.03 | NA      | NA       | NA      |
| Aminoacid biosynthesis | RNA              | K01735 | aroB       | 3-dehydroquinate synthase [EC:4.2.3.4]                                                  | 118     | 95.9   | 12.8    | 13.1   | 0.0466 | 1.23 | NA      | NA       | NA      |
| Aminoacid biosynthesis | Transcripts/gene | NA     | aroB       | pentafunctional AROM polypeptide [EC:4.2.3.4 4.2.1.10 1.1.1.25 2.7.1.71 2.5.1.19]       | 0.577   | 0.481  | 0.0738  | 0.0552 | 0.097  | 1.2  | NA      | NA       | NA      |
| Aminoacid biosynthesis | DNA              | K13830 | ARO1       | pentafunctional AROM polypeptide [EC:4.2.3.4 4.2.1.10 1.1.1.25 2.7.1.71 2.5.1.19]       | 0.625   | 1.02   | 0.203   | 0.177  | 0.0425 | 1.63 | NA      | NA       | NA      |
| Aminoacid biosynthesis | RNA              | K13830 | ARO1       | pentafunctional AROM polypeptide [EC:4.2.3.4 4.2.1.10 1.1.1.25 2.7.1.71 2.5.1.19]       | 0.45    | 0.36   | 0.229   | 0.0671 | 0.73   | 1.25 | NA      | NA       | NA      |
| Aminoacid biosynthesis | DNA              | K01736 | aroC       | chorismate synthase [EC:4.2.3.5]                                                        | 247     | 243    | 23.9    | 19.2   | 1      | 1.02 | NA      | NA       | NA      |
| Aminoacid biosynthesis | RNA              | K01736 | aroC       | chorismate synthase [EC:4.2.3.5]                                                        | 152     | 113    | 21.3    | 17.8   | 0.0297 | 1.35 | NA      | NA       | NA      |
| Aminoacid biosynthesis | Transcripts/gene | NA     | aroC       | chorismate synthase [EC:4.2.3.5]                                                        | 0.623   | 0.466  | 0.128   | 0.0826 | 0.125  | 1.34 | NA      | NA       | NA      |
| Aminoacid biosynthesis | DNA              | K01750 | ocd        | ornithine cyclodeaminase [EC:4.3.1.12]                                                  | 48.7    | 29.3   | 10.5    | 5.7    | 0.0408 | 1.66 | -0.0209 | -0.00336 | -0.0128 |
| Aminoacid biosynthesis | RNA              | K01750 | ocd        | ornithine cyclodeaminase [EC:4.3.1.12]                                                  | 15.1    | 13.8   | 6.9     | 5.37   | 0.788  | 1.09 | NA      | NA       | NA      |
| Aminoacid biosynthesis | Transcripts/gene | NA     | ocd        | ornithine cyclodeaminase [EC:4.3.1.12]                                                  | 0.313   | 0.47   | 0.12    | 0.122  | 0.155  | 1.5  | NA      | NA       | NA      |
| Aminoacid biosynthesis | DNA              | K01752 | sdaA       | L-serine dehydratase [EC:4.3.1.17]                                                      | 129     | 125    | 34.8    | 15.3   | 1      | 1.03 | NA      | NA       | NA      |
| Aminoacid biosynthesis | RNA              | K01752 | sdaA       | L-serine dehydratase [EC:4.3.1.17]                                                      | 39.6    | 34.9   | 8.39    | 3.75   | 0.471  | 1.14 | NA      | NA       | NA      |
| Aminoacid biosynthesis | Transcripts/gene | NA     | sdaA       | L-serine dehydratase [EC:4.3.1.17]                                                      | 0.317   | 0.282  | 0.067   | 0.0386 | 0.554  | 1.12 | NA      | NA       | NA      |
| Aminoacid biosynthesis | DNA              | K01754 | ilvA, tdcB | threonine dehydratase [EC:4.3.1.19]                                                     | 109     | 85.7   | 22.2    | 21.4   | 0.563  | 1.27 | NA      | NA       | NA      |
| Aminoacid biosynthesis | RNA              | K01754 | ilvA, tdcB | threonine dehydratase [EC:4.3.1.19]                                                     | 67.9    | 51.7   | 13      | 8.9    | 0.158  | 1.31 | NA      | NA       | NA      |
| Aminoacid biosynthesis | Transcripts/gene | NA     | ilvA, tdcB | threonine dehydratase [EC:4.3.1.19]                                                     | 0.634   | 0.627  | 0.11    | 0.154  | 0.731  | 1.01 | NA      | NA       | NA      |
| Aminoacid biosynthesis | DNA              | K01755 | argH       | argininosuccinate lyase [EC:4.3.2.1]                                                    | 314     | 307    | 37      | 21.4   | 1      | 1.02 | NA      | NA       | NA      |
| Aminoacid biosynthesis | RNA              | K01755 | argH       | argininosuccinate lyase [EC:4.3.2.1]                                                    | 226     | 195    | 22      | 18     | 0.101  | 1.16 | NA      | NA       | NA      |
| Aminoacid biosynthesis | Transcripts/gene | NA     | argH       | argininosuccinate lyase / amino-acid N-acetyltransferase [EC:4.3.2.1 2.3.1.1]           | 0.73    | 0.637  | 0.126   | 0.0491 | 0.234  | 1.15 | NA      | NA       | NA      |
| Aminoacid biosynthesis | DNA              | K14681 | argHA      | argininosuccinate lyase / amino-acid N-acetyltransferase [EC:4.3.2.1 2.3.1.1]           | 0.129   | 0.146  | 0.0998  | 0.0579 | 0.968  | 1.13 | NA      | NA       | NA      |
| Aminoacid biosynthesis | RNA              | K14681 | argHA      | argininosuccinate lyase / amino-acid N-acetyltransferase [EC:4.3.2.1 2.3.1.1]           | 0.0537  | 0.0326 | 0.0356  | 0.0352 | 0.517  | 1.65 | NA      | NA       | NA      |
| Aminoacid biosynthesis | DNA              | K01714 | dapA       | 4-hydroxy-tetrahydrodipicolinate synthase [EC:4.3.3.7]                                  | 300     | 302    | 35.3    | 28.6   | 1      | 1.01 | NA      | NA       | NA      |
| Aminoacid biosynthesis | RNA              | K01714 | dapA       | 4-hydroxy-tetrahydrodipicolinate synthase [EC:4.3.3.7]                                  | 305     | 255    | 46.2    | 33.9   | 0.207  | 1.19 | NA      | NA       | NA      |
| Aminoacid biosynthesis | Transcripts/gene | NA     | dapA       | 4-hydroxy-tetrahydrodipicolinate synthase [EC:4.3.3.7]                                  | 1.03    | 0.85   | 0.174   | 0.129  | 0.155  | 1.21 | NA      | NA       | NA      |
| Aminoacid biosynthesis | DNA              | K01758 | CTH        | cystathionine gamma-lyase [EC:4.4.1.1]                                                  | 74.9    | 80.5   | 8.38    | 15.8   | 0.731  | 1.07 | NA      | NA       | NA      |
| Aminoacid biosynthesis | RNA              | K01758 | CTH        | cystathionine gamma-lyase [EC:4.4.1.1]                                                  | 18.4    | 17.2   | 4.08    | 3.45   | 0.788  | 1.07 | NA      | NA       | NA      |
| Aminoacid biosynthesis | Transcripts/gene | NA     | CTH        | cystathionine gamma-lyase [EC:4.4.1.1]                                                  | 0.245   | 0.215  | 0.0492  | 0.0251 | 0.426  | 1.14 | NA      | NA       | NA      |
| Aminoacid biosynthesis | DNA              | K01761 | NA         | methionine-gamma-lyase [EC:4.4.1.11]                                                    | 27.4    | 27.2   | 5.8     | 7.82   | 1      | 1.01 | NA      | NA       | NA      |
| Aminoacid biosynthesis | RNA              | K01761 | NA         | methionine-gamma-lyase [EC:4.4.1.11]                                                    | 31      | 23.3   | 7.28    | 4.29   | 0.152  | 1.33 | NA      | NA       | NA      |
| Aminoacid biosynthesis | Transcripts/gene | NA     | NA         | methionine-gamma-lyase [EC:4.4.1.11]                                                    | 1.2     | 0.909  | 0.492   | 0.251  | 0.486  | 1.32 | NA      | NA       | NA      |
| Aminoacid biosynthesis | DNA              | K01762 | ACS        | 1-aminocyclopropane-1-carboxylate synthase [EC:4.4.1.14]                                | 0.00858 | 0.0089 | 0.00462 | 0.0069 | 1      | 1.03 | NA      | NA       | NA      |
| Aminoacid biosynthesis | RNA              | K01762 | ACS        | 1-aminocyclopropane-1-carboxylate synthase [EC:4.4.1.14]                                | 0.0585  | 0.042  | 0.0555  | 0.0628 | 0.73   | 1.39 | NA      | NA       | NA      |
| Aminoacid biosynthesis | Transcripts/gene | NA     | ACS        | 1-aminocyclopropane-1-carboxylate synthase [EC:4.4.1.14]                                | 7.8     | 4.79   | 11      | 6.89   | 0.751  | 1.63 | NA      | NA       | NA      |
| Aminoacid biosynthesis | DNA              | K05396 | dcyD       | D-cysteine desulfhydrase [EC:4.4.1.15]                                                  | 13.9    | 17.5   | 3.38    | 5.54   | 0.563  | 1.26 | NA      | NA       | NA      |
| Aminoacid biosynthesis | RNA              | K05396 | dcyD       | D-cysteine desulfhydrase [EC:4.4.1.15]                                                  | 5.94    | 5      | 2.86    | 1.29   | 0.788  | 1.19 | NA      | NA       | NA      |
| Aminoacid biosynthesis | Transcripts/gene | NA     | dcyD       | D-cysteine desulfhydrase [EC:4.4.1.15]                                                  | 0.424   | 0.306  | 0.137   | 0.0924 | 0.344  | 1.39 | NA      | NA       | NA      |
| Aminoacid biosynthesis | DNA              | K07173 | luxS       | S-ribosylhomocysteine lyase [EC:4.4.1.21]                                               | 88.5    | 82.2   | 10.1    | 6.64   | 0.504  | 1.08 | NA      | NA       | NA      |
| Aminoacid biosynthesis | RNA              | K07173 | luxS       | S-ribosylhomocysteine lyase [EC:4.4.1.21]                                               | 49      | 44.5   | 5.87    | 7.67   | 0.471  | 1.1  | NA      | NA       | NA      |

|                        |                  |        |            |                                                                                                                                     |        |        |        |        |         |      |         |          |          |
|------------------------|------------------|--------|------------|-------------------------------------------------------------------------------------------------------------------------------------|--------|--------|--------|--------|---------|------|---------|----------|----------|
| Aminoacid biosynthesis | Transcripts/gene | NA     | luxS       | S-ribosylhomocysteine lyase [EC:4.4.1.21]                                                                                           | 0.557  | 0.54   | 0.0682 | 0.0659 | 0.731   | 1.03 | NA      | NA       | NA       |
| Aminoacid biosynthesis | DNA              | K01760 | metC       | cystathionine beta-lyase [EC:4.4.1.8]                                                                                               | 36.4   | 32.2   | 11.4   | 6.73   | 1       | 1.13 | NA      | NA       | NA       |
| Aminoacid biosynthesis | RNA              | K01760 | metC       | cystathionine beta-lyase [EC:4.4.1.8]                                                                                               | 43.3   | 6.04   | 39.2   | 2.66   | 0.00669 | 7.17 | NA      | NA       | NA       |
| Aminoacid biosynthesis | DNA              | K14155 | patB, malY | cystathionine beta-lyase [EC:4.4.1.8]                                                                                               | 331    | 282    | 30.6   | 10.9   | 0.033   | 1.17 | -0.0154 | -0.00544 | -0.0107  |
| Aminoacid biosynthesis | RNA              | K14155 | patB, malY | cystathionine beta-lyase [EC:4.4.1.8]                                                                                               | 150    | 96.3   | 31.3   | 11.7   | 0.00669 | 1.56 | NA      | NA       | NA       |
| Aminoacid biosynthesis | Transcripts/gene | NA     | patB, malY | cystathionine beta-lyase [EC:4.4.1.8]                                                                                               | 0.535  | 0.327  | 0.193  | 0.0417 | 0.097   | 1.64 | NA      | NA       | NA       |
| Aminoacid biosynthesis | DNA              | K01778 | dapF       | diaminopimelate epimerase [EC:5.1.1.7]                                                                                              | 169    | 162    | 15.3   | 12.3   | 0.875   | 1.04 | NA      | NA       | NA       |
| Aminoacid biosynthesis | RNA              | K01778 | dapF       | diaminopimelate epimerase [EC:5.1.1.7]                                                                                              | 50.1   | 37.4   | 13.8   | 12.5   | 0.253   | 1.34 | NA      | NA       | NA       |
| Aminoacid biosynthesis | Transcripts/gene | NA     | dapF       | diaminopimelate epimerase [EC:5.1.1.7]                                                                                              | 0.295  | 0.227  | 0.0675 | 0.061  | 0.177   | 1.3  | NA      | NA       | NA       |
| Aminoacid biosynthesis | DNA              | K01783 | rpe        | ribulose-phosphate 3-epimerase [EC:5.1.3.1]                                                                                         | 178    | 183    | 17.1   | 11.5   | 0.968   | 1.03 | NA      | NA       | NA       |
| Aminoacid biosynthesis | RNA              | K01783 | rpe        | ribulose-phosphate 3-epimerase [EC:5.1.3.1]                                                                                         | 146    | 136    | 17.1   | 13.6   | 0.384   | 1.08 | NA      | NA       | NA       |
| Aminoacid biosynthesis | Transcripts/gene | NA     | rpe        | ribulose-phosphate 3-epimerase [EC:5.1.3.1]                                                                                         | 0.833  | 0.747  | 0.165  | 0.0753 | 0.554   | 1.12 | NA      | NA       | NA       |
| Aminoacid biosynthesis | DNA              | K01803 | tpiA       | triosephosphate isomerase (TIM) [EC:5.3.1.1]                                                                                        | 213    | 214    | 19.4   | 9.76   | 1       | 1    | NA      | NA       | NA       |
| Aminoacid biosynthesis | RNA              | K01803 | tpiA       | triosephosphate isomerase (TIM) [EC:5.3.1.1]                                                                                        | 880    | 800    | 126    | 119    | 0.572   | 1.1  | NA      | NA       | NA       |
| Aminoacid biosynthesis | Transcripts/gene | NA     | tpiA       | triosephosphate isomerase (TIM) [EC:5.3.1.1]                                                                                        | 4.16   | 3.75   | 0.701  | 0.558  | 0.408   | 1.11 | NA      | NA       | NA       |
| Aminoacid biosynthesis | DNA              | K01814 | hisA       | phosphoribosylformimino-5-aminoimidazole carboxamide ribotide isomerase [EC:5.3.1.16]                                               | 138    | 135    | 16.1   | 12.2   | 1       | 1.02 | NA      | NA       | NA       |
| Aminoacid biosynthesis | RNA              | K01814 | hisA       | phosphoribosylformimino-5-aminoimidazole carboxamide ribotide isomerase [EC:5.3.1.16]                                               | 71.6   | 54.5   | 15.8   | 6.9    | 0.122   | 1.31 | NA      | NA       | NA       |
| Aminoacid biosynthesis | Transcripts/gene | NA     | hisA       | phosphoribosylformimino-5-aminoimidazole carboxamide ribotide isomerase [EC:5.3.1.16]                                               | 0.532  | 0.407  | 0.172  | 0.0688 | 0.234   | 1.31 | NA      | NA       | NA       |
| Aminoacid biosynthesis | DNA              | K08963 | mtnA       | methylthioribose-1-phosphate isomerase [EC:5.3.1.23]                                                                                | 52.9   | 56.9   | 7.89   | 14.8   | 0.875   | 1.07 | NA      | NA       | NA       |
| Aminoacid biosynthesis | RNA              | K08963 | mtnA       | methylthioribose-1-phosphate isomerase [EC:5.3.1.23]                                                                                | 20.7   | 19.9   | 6.12   | 4.78   | 0.895   | 1.04 | NA      | NA       | NA       |
| Aminoacid biosynthesis | Transcripts/gene | NA     | mtnA       | methylthioribose-1-phosphate isomerase [EC:5.3.1.23]                                                                                | 0.401  | 0.369  | 0.131  | 0.12   | 0.902   | 1.09 | NA      | NA       | NA       |
| Aminoacid biosynthesis | DNA              | K01817 | trpF       | phosphoribosylanthranilate isomerase [EC:5.3.1.24]                                                                                  | 87.8   | 85.9   | 9.52   | 4.22   | 1       | 1.02 | NA      | NA       | NA       |
| Aminoacid biosynthesis | RNA              | K01817 | trpF       | phosphoribosylanthranilate isomerase [EC:5.3.1.24]                                                                                  | 34.7   | 30.5   | 10.7   | 10.1   | 0.623   | 1.14 | NA      | NA       | NA       |
| Aminoacid biosynthesis | Transcripts/gene | NA     | trpF       | anthranilate synthase / indole-3-glycerol phosphate synthase / phosphoribosylanthranilate isomerase [EC:4.1.3.27 4.1.1.48 5.3.1.24] | 0.387  | 0.349  | 0.14   | 0.0942 | 0.671   | 1.11 | NA      | NA       | NA       |
| Aminoacid biosynthesis | DNA              | K08094 | hxB        | 6-phospho-3-hexuloisomerase [EC:5.3.1.27]                                                                                           | 10.5   | 8.01   | 3.05   | 2.74   | 0.779   | 1.31 | NA      | NA       | NA       |
| Aminoacid biosynthesis | RNA              | K08094 | hxB        | 6-phospho-3-hexuloisomerase [EC:5.3.1.27]                                                                                           | 1.91   | 1.93   | 0.779  | 0.632  | 1       | 1.01 | NA      | NA       | NA       |
| Aminoacid biosynthesis | Transcripts/gene | NA     | hxB        | 3-hexulose-6-phosphate synthase / 6-phospho-3-hexuloisomerase [EC:4.1.2.43 5.3.1.27]                                                | 0.188  | 0.23   | 0.0822 | 0.103  | 0.671   | 1.22 | NA      | NA       | NA       |
| Aminoacid biosynthesis | DNA              | K01807 | rpiA       | ribose 5-phosphate isomerase A [EC:5.3.1.6]                                                                                         | 11.8   | 9.61   | 3.49   | 2.1    | 0.676   | 1.23 | NA      | NA       | NA       |
| Aminoacid biosynthesis | RNA              | K01807 | rpiA       | ribose 5-phosphate isomerase A [EC:5.3.1.6]                                                                                         | 3.39   | 2.33   | 1.6    | 0.518  | 0.424   | 1.45 | NA      | NA       | NA       |
| Aminoacid biosynthesis | DNA              | K01808 | rpiB       | ribose 5-phosphate isomerase B [EC:5.3.1.6]                                                                                         | 141    | 137    | 13     | 11.9   | 0.911   | 1.03 | NA      | NA       | NA       |
| Aminoacid biosynthesis | RNA              | K01808 | rpiB       | ribose 5-phosphate isomerase B [EC:5.3.1.6]                                                                                         | 198    | 222    | 16.6   | 56.7   | 0.471   | 1.12 | NA      | NA       | NA       |
| Aminoacid biosynthesis | Transcripts/gene | NA     | rpiB       | ribose 5-phosphate isomerase B [EC:5.3.1.6]                                                                                         | 1.32   | 1.53   | 0.135  | 0.365  | 0.354   | 1.16 | NA      | NA       | NA       |
| Aminoacid biosynthesis | Transcripts/gene | NA     | tal-pgi    | transaldolase / glucose-6-phosphate isomerase [EC:2.2.1.2 5.3.1.9]                                                                  | 2.16   | 2.12   | 0.38   | 0.317  | 0.785   | 1.02 | NA      | NA       | NA       |
| Aminoacid biosynthesis | DNA              | K08965 | mtnW       | 2,3-diketo-5-methylthiopentyl-1-phosphate enolase [EC:5.3.2.5]                                                                      | 2.19   | 1.05   | 0.768  | 0.425  | 0.0752  | 2.09 | -0.0132 | -0.00388 | -0.00848 |
| Aminoacid biosynthesis | RNA              | K08965 | mtnW       | 2,3-diketo-5-methylthiopentyl-1-phosphate enolase [EC:5.3.2.5]                                                                      | 4.49   | 0.441  | 9.01   | 0.263  | 0.11    | 10.2 | NA      | NA       | NA       |
| Aminoacid biosynthesis | Transcripts/gene | NA     | mtnW       | 2,3-diketo-5-methylthiopentyl-1-phosphate enolase [EC:5.3.2.5]                                                                      | 1.54   | 0.447  | 2.49   | 0.224  | 0.382   | 3.45 | NA      | NA       | NA       |
| Aminoacid biosynthesis | DNA              | K01834 | gpmA       | 2,3-bisphosphoglycerate-dependent phosphoglycerate mutase [EC:5.4.2.11]                                                             | 728    | 703    | 54.8   | 24.6   | 0.875   | 1.03 | NA      | NA       | NA       |
| Aminoacid biosynthesis | RNA              | K01834 | gpmA       | 2,3-bisphosphoglycerate-dependent phosphoglycerate mutase [EC:5.4.2.11]                                                             | 1050   | 886    | 103    | 84.4   | 0.0881  | 1.19 | NA      | NA       | NA       |
| Aminoacid biosynthesis | Transcripts/gene | NA     | gpmA       | 2,3-bisphosphoglycerate-dependent phosphoglycerate mutase [EC:5.4.2.11]                                                             | 1.45   | 1.26   | 0.177  | 0.0855 | 0.125   | 1.15 | NA      | NA       | NA       |
| Aminoacid biosynthesis | DNA              | K01850 | NA         | chorismate mutase [EC:5.4.99.5]                                                                                                     | 0.708  | 0.779  | 0.249  | 0.513  | 1       | 1.1  | NA      | NA       | NA       |
| Aminoacid biosynthesis | RNA              | K01850 | NA         | chorismate mutase [EC:5.4.99.5]                                                                                                     | 0.132  | 0.128  | 0.121  | 0.071  | 0.843   | 1.03 | NA      | NA       | NA       |
| Aminoacid biosynthesis | DNA              | K04092 | tyrA1      | chorismate mutase [EC:5.4.99.5]                                                                                                     | 0.0607 | 0.0408 | 0.016  | 0.0111 | 0.174   | 1.49 | NA      | NA       | NA       |
| Aminoacid biosynthesis | RNA              | K04093 | pheA1      | chorismate mutase [EC:5.4.99.5]                                                                                                     | 1.99   | 2.12   | 0.57   | 0.733  | 1       | 1.07 | NA      | NA       | NA       |
| Aminoacid biosynthesis | Transcripts/gene | NA     | pheA1      | chorismate mutase [EC:5.4.99.5]                                                                                                     | 0.502  | 1.05   | 0.484  | 0.518  | 0.0867  | 2.08 | NA      | NA       | NA       |
| Aminoacid biosynthesis | DNA              | K04516 | aroA       | chorismate mutase [EC:5.4.99.5]                                                                                                     | 118    | 118    | 14.3   | 14.6   | 1       | 1    | NA      | NA       | NA       |
| Aminoacid biosynthesis | RNA              | K04516 | aroA       | chorismate mutase [EC:5.4.99.5]                                                                                                     | 157    | 90.9   | 47.9   | 41.8   | 0.142   | 1.73 | NA      | NA       | NA       |
| Aminoacid biosynthesis | DNA              | K06208 | aroH       | chorismate mutase [EC:5.4.99.5]                                                                                                     | 2.48   | 2.86   | 0.798  | 2.61   | 0.989   | 1.15 | NA      | NA       | NA       |
| Aminoacid biosynthesis | RNA              | K06208 | aroH       | chorismate mutase [EC:5.4.99.5]                                                                                                     | 0.478  | 1.1    | 0.284  | 1.25   | 0.623   | 2.3  | NA      | NA       | NA       |
| Aminoacid biosynthesis | Transcripts/gene | NA     | pheB       | chorismate mutase [EC:5.4.99.5]                                                                                                     | 21.5   | 18.6   | 4.41   | 4.09   | 0.938   | 1.15 | NA      | NA       | NA       |
| Aminoacid biosynthesis | RNA              | K06209 | pheB       | chorismate mutase [EC:5.4.99.5]                                                                                                     | 8.63   | 5.56   | 2.7    | 1.58   | 0.142   | 1.55 | -0.0271 | -0.00397 | -0.0162  |
| Aminoacid biosynthesis | Transcripts/gene | NA     | tyrA       | chorismate mutase / prephenate dehydrogenase [EC:5.4.99.5 1.3.1.12]                                                                 | 0.897  | 0.541  | 0.24   | 0.187  | 0.125   | 1.66 | NA      | NA       | NA       |
| Aminoacid biosynthesis | DNA              | K14187 | tyrA       | chorismate mutase / prephenate dehydrogenase [EC:5.4.99.5 1.3.1.12]                                                                 | 0.592  | 0.777  | 0.166  | 0.261  | 0.676   | 1.31 | NA      | NA       | NA       |
| Aminoacid biosynthesis | RNA              | K14187 | tyrA       | chorismate mutase / prephenate dehydrogenase [EC:5.4.99.5 1.3.1.12]                                                                 | 0.131  | 0.218  | 0.159  | 0.199  | 0.623   | 1.66 | NA      | NA       | NA       |
| Aminoacid biosynthesis | DNA              | K14170 | pheA       | chorismate mutase / prephenate dehydratase [EC:5.4.99.5 4.2.1.51]                                                                   | 76.4   | 74     | 11.7   | 15.5   | 1       | 1.03 | NA      | NA       | NA       |
| Aminoacid biosynthesis | RNA              | K14170 | pheA       | chorismate mutase / prephenate dehydratase [EC:5.4.99.5 4.2.1.51]                                                                   | 29.5   | 18.1   | 5.94   | 3.42   | 0.0252  | 1.63 | -0.0314 | -0.0101  | -0.0218  |
| Aminoacid biosynthesis | DNA              | K01914 | asnA       | aspartate--ammonia ligase [EC:6.3.1.1]                                                                                              | 204    | 194    | 11.1   | 6.2    | 0.504   | 1.05 | NA      | NA       | NA       |
| Aminoacid biosynthesis | RNA              | K01914 | asnA       | aspartate--ammonia ligase [EC:6.3.1.1]                                                                                              | 206    | 169    | 68     | 23.4   | 0.344   | 1.22 | NA      | NA       | NA       |
| Aminoacid biosynthesis | Transcripts/gene | NA     | asnA       | aspartate--ammonia ligase [EC:6.3.1.1]                                                                                              | 1.01   | 0.872  | 0.305  | 0.126  | 0.594   | 1.16 | NA      | NA       | NA       |
| Aminoacid biosynthesis | DNA              | K01915 | glnA       | glutamine synthetase [EC:6.3.1.2]                                                                                                   | 963    | 989    | 108    | 70.4   | 1       | 1.03 | NA      | NA       | NA       |
| Aminoacid biosynthesis | RNA              | K01915 | glnA       | glutamine synthetase [EC:6.3.1.2]                                                                                                   | 538    | 459    | 63.9   | 62.1   | 0.207   | 1.17 | NA      | NA       | NA       |
| Aminoacid biosynthesis | Transcripts/gene | NA     | glnA       | glutamine synthetase [EC:6.3.1.2]                                                                                                   | 0.565  | 0.467  | 0.0939 | 0.0684 | 0.136   | 1.21 | NA      | NA       | NA       |
| Aminoacid biosynthesis | DNA              | K01948 | CPS1       | carbamoyl-phosphate synthase (ammonia) [EC:6.3.4.16]                                                                                | 0.543  | 1.04   | 0.131  | 0.638  | 0.0977  | 1.91 | NA      | NA       | NA       |
| Aminoacid biosynthesis | RNA              | K01948 | CPS1       | carbamoyl-phosphate synthase (ammonia) [EC:6.3.4.16]                                                                                | 0.545  | 0.425  | 0.233  | 0.239  | 0.519   | 1.28 | NA      | NA       | NA       |
| Aminoacid biosynthesis | Transcripts/gene | NA     | CPS1       | carbamoyl-phosphate synthase (ammonia) [EC:6.3.4.16]                                                                                | 1.05   | 0.452  | 0.478  | 0.222  | 0.097   | 2.33 | NA      | NA       | NA       |
| Aminoacid biosynthesis | DNA              | K01940 | argG       | argininosuccinate synthase [EC:6.3.4.5]                                                                                             | 321    | 316    | 33.4   | 18.4   | 1       | 1.02 | NA      | NA       | NA       |
| Aminoacid biosynthesis | RNA              | K01940 | argG       | argininosuccinate synthase [EC:6.3.4.5]                                                                                             | 360    | 258    | 82.9   | 32.3   | 0.125   | 1.39 | -0.0273 | -0.00326 | -0.0147  |
| Aminoacid biosynthesis | Transcripts/gene | NA     | argG       | argininosuccinate synthase [EC:6.3.4.5]                                                                                             | 1.13   | 0.819  | 0.249  | 0.0949 | 0.125   | 1.37 | NA      | NA       | NA       |
| Aminoacid biosynthesis | DNA              | K01958 | pyc        | pyruvate carboxylase [EC:6.4.1.1]                                                                                                   | 69.2   | 57.8   | 16.9   | 16.2   | 0.83    | 1.2  | NA      | NA       | NA       |
| Aminoacid biosynthesis | RNA              | K01958 | pyc        | pyruvate carboxylase [EC:6.4.1.1]                                                                                                   | 45.2   | 30.6   | 11.3   | 6.65   | 0.0968  | 1.48 | NA      | NA       | NA       |
| Aminoacid biosynthesis | DNA              | K01959 | pycA       | pyruvate carboxylase subunit A [EC:6.4.1.1]                                                                                         | 9.52   | 9.54   | 2.05   | 3.39   | 1       | 1    | NA      | NA       | NA       |
| Aminoacid biosynthesis | RNA              | K01959 | pycA       | pyruvate carboxylase subunit A [EC:6.4.1.1]                                                                                         | 1.54   | 3      | 0.375  | 1.01   | 0.0364  | 1.95 | NA      | NA       | NA       |
| Aminoacid biosynthesis | DNA              | K01960 | pycB       | pyruvate carboxylase subunit B [EC:6.4.1.1]                                                                                         | 249    | 255    | 26.4   | 23.4   | 0.989   | 1.02 | NA      | NA       | NA       |
| Aminoacid biosynthesis | RNA              | K01960 | pycB       | pyruvate carboxylase subunit B [EC:6.4.1.1]                                                                                         | 501    | 455    | 80.2   | 61.6   | 0.382   | 1.1  | NA      | NA       | NA       |
| Aminoacid biosynthesis | Transcripts/gene | NA     | pycB       | pyruvate carboxylase subunit B [EC:6.4.1.1]                                                                                         | 1.71   | 1.52   | 0.413  | 0.163  | 0.636   | 1.13 | NA      | NA       | NA       |
| Aminoacid biosynthesis | DNA              | K00841 | pata       | aminotransferase [EC:2.6.1.-]                                                                                                       | 2.49   | 1.64   | 1.01   | 0.459  | 0.299   | 1.52 | NA      | NA       | NA       |
| Aminoacid biosynthesis | RNA              | K00841 | pata       | aminotransferase [EC:2.6.1.-]                                                                                                       | 1.48   | 0.687  | 0.999  | 0.204  | 0.119   | 2.16 | NA      | NA       | NA       |
| Aminoacid biosynthesis | DNA              | K01663 | HIS7       | glutamine amidotransferase / cyclase [EC:2.4.2.- 4.1.3.-]                                                                           | 0.425  | 0.529  | 0.105  | 0.174  | 0.779   | 1.25 | NA      | NA       | NA       |
| Aminoacid biosynthesis | RNA              | K01663 | HIS7       | glutamine amidotransferase / cyclase [EC:2.4.2.- 4.1.3.-]                                                                           | 0.373  | 0.313  | 0.0684 | 0.0889 | 0.572   | 1.19 | NA      | NA       | NA       |
| Aminoacid biosynthesis | DNA              | K02500 | hisF       | cyclase [EC:4.1.3.-]                                                                                                                | 154    | 153    | 18     | 14.2   | 1       | 1    | NA      | NA       | NA       |
| Aminoacid biosynthesis | RNA              | K02500 | hisF       | cyclase [EC:4.1.3.-]                                                                                                                | 74.6   | 57.4   | 15.9   | 5.71   | 0.147   | 1.3  | NA      | NA       | NA       |
| Aminoacid biosynthesis | DNA              | K02501 | hisH       | glutamine amidotransferase [EC:2.4.2.-]                                                                                             | 119    | 115    | 13.5   | 9.21   | 1       | 1.03 | NA      | NA       | NA       |
| Aminoacid biosynthesis | RNA              | K02501 | hisH       | glutamine amidotransferase [EC:2.4.2.-]                                                                                             | 63.5   | 49.7   | 8.79   | 4.79   | 0.0413  | 1.28 | NA      | NA       | NA       |
| Aminoacid biosynthesis | DNA              | K02502 | hisZ       | ATP phosphoribosyltransferase regulatory subunit                                                                                    | 66.7   | 63.3   | 10.6   | 16.9   | 1       | 1.05 | NA      | NA       | NA       |
| Aminoacid biosynthesis | RNA              | K02502 | hisZ       | ATP phosphoribosyltransferase regulatory subunit                                                                                    | 19.2   | 17.2   | 3.78   | 4.07   | 0.424   | 1.11 | NA      | NA       | NA       |





|                   |                  |        |            |                                                                                     |        |        |        |        |         |      |         |          |          |
|-------------------|------------------|--------|------------|-------------------------------------------------------------------------------------|--------|--------|--------|--------|---------|------|---------|----------|----------|
| PTS and Galactose | RNA              | K02752 | ascF       | PTS system, arbutin-, cellobiose-, and salicin-specific IIB component [EC:2.7.1.69] | 0.42   | 0.329  | 0.387  | 0.21   | 1       | 1.28 | NA      | NA       | NA       |
| PTS and Galactose | DNA              | K02755 | bgfI       | PTS system, beta-glucosides-specific IIA component [EC:2.7.1.69]                    | 136    | 83.2   | 34.7   | 38.6   | 0.203   | 1.64 | NA      | NA       | NA       |
| PTS and Galactose | RNA              | K02755 | bgfI       | PTS system, beta-glucosides-specific IIA component [EC:2.7.1.69]                    | 84.1   | 98.6   | 40.9   | 55.2   | 0.843   | 1.17 | NA      | NA       | NA       |
| PTS and Galactose | DNA              | K02756 | bgfI       | PTS system, beta-glucosides-specific IIB component [EC:2.7.1.69]                    | 21.1   | 7.58   | 9.8    | 3.67   | 0.129   | 2.78 | -0.0121 | -0.00165 | -0.00486 |
| PTS and Galactose | RNA              | K02756 | bgfI       | PTS system, beta-glucosides-specific IIB component [EC:2.7.1.69]                    | 1.79   | 0.728  | 0.729  | 0.371  | 0.0413  | 2.46 | -0.0249 | -0.00645 | -0.0154  |
| PTS and Galactose | DNA              | K02759 | celC       | PTS system, cellobiose-specific IIA component [EC:2.7.1.69]                         | 14.6   | 2.96   | 5.57   | 0.905  | 0.00856 | 4.94 | -0.0126 | -0.00723 | -0.0102  |
| PTS and Galactose | RNA              | K02759 | celC       | PTS system, cellobiose-specific IIA component [EC:2.7.1.69]                         | 44     | 12.6   | 23     | 6.8    | 0.047   | 3.49 | NA      | NA       | NA       |
| PTS and Galactose | DNA              | K02760 | celA       | PTS system, cellobiose-specific IIB component [EC:2.7.1.69]                         | 34.9   | 6.18   | 15.3   | 1.99   | 0.00856 | 5.64 | -0.0115 | -0.00446 | -0.00738 |
| PTS and Galactose | RNA              | K02760 | celA       | PTS system, cellobiose-specific IIB component [EC:2.7.1.69]                         | 132    | 29.9   | 74.8   | 15.7   | 0.00669 | 4.42 | -0.0251 | -0.00431 | -0.0109  |
| PTS and Galactose | DNA              | K02763 | gampP      | PTS system, D-glucosamine-specific IIA component [EC:2.7.1.69]                      | 38.2   | 24.3   | 15.6   | 17.1   | 0.301   | 1.57 | NA      | NA       | NA       |
| PTS and Galactose | RNA              | K02763 | gampP      | PTS system, D-glucosamine-specific IIA component [EC:2.7.1.69]                      | 31.1   | 82.4   | 21.5   | 93.6   | 0.344   | 2.65 | NA      | NA       | NA       |
| PTS and Galactose | DNA              | K02768 | fruB       | PTS system, fructose-specific IIA component [EC:2.7.1.69]                           | 118    | 97.3   | 29.4   | 33.9   | 0.875   | 1.21 | NA      | NA       | NA       |
| PTS and Galactose | RNA              | K02768 | fruB       | PTS system, fructose-specific IIA component [EC:2.7.1.69]                           | 198    | 266    | 78     | 133    | 0.572   | 1.35 | NA      | NA       | NA       |
| PTS and Galactose | DNA              | K02769 | fruA       | PTS system, fructose-specific IIB component [EC:2.7.1.69]                           | 7.48   | 1.5    | 3.67   | 0.583  | 0.053   | 4.98 | -0.0125 | -0.00528 | -0.00884 |
| PTS and Galactose | RNA              | K02769 | fruA       | PTS system, fructose-specific IIB component [EC:2.7.1.69]                           | 10.5   | 6.43   | 2.44   | 2.1    | 0.0736  | 1.63 | NA      | NA       | NA       |
| PTS and Galactose | DNA              | K02773 | gata       | PTS system, galactitol-specific IIA component [EC:2.7.1.69]                         | 4.28   | 1.56   | 2.61   | 0.795  | 0.136   | 2.73 | NA      | NA       | NA       |
| PTS and Galactose | RNA              | K02773 | gata       | PTS system, galactitol-specific IIA component [EC:2.7.1.69]                         | 1.15   | 0.441  | 0.625  | 0.289  | 0.075   | 2.6  | NA      | NA       | NA       |
| PTS and Galactose | DNA              | K02774 | gatB       | PTS system, galactitol-specific IIB component [EC:2.7.1.69]                         | 3.04   | 1.08   | 1.61   | 0.617  | 0.11    | 2.82 | NA      | NA       | NA       |
| PTS and Galactose | RNA              | K02774 | gatB       | PTS system, galactitol-specific IIB component [EC:2.7.1.69]                         | 1.9    | 0.516  | 0.797  | 0.238  | 0.00669 | 3.68 | -0.0259 | -0.0105  | -0.0205  |
| PTS and Galactose | DNA              | K02777 | ctr        | PTS system, glucose-specific IIA component [EC:2.7.1.69]                            | 28.9   | 7.75   | 13.1   | 2.58   | 0.00856 | 3.73 | -0.0106 | -0.0037  | -0.00644 |
| PTS and Galactose | RNA              | K02777 | ctr        | PTS system, glucose-specific IIA component [EC:2.7.1.69]                            | 24.3   | 13.7   | 7.02   | 6.14   | 0.822   | 1.78 | NA      | NA       | NA       |
| PTS and Galactose | DNA              | K02778 | ptsG       | PTS system, glucose-specific IIB component [EC:2.7.1.69]                            | 19.7   | 2.96   | 9.75   | 1.49   | 0.00856 | 6.66 | -0.0111 | -0.00237 | -0.00667 |
| PTS and Galactose | RNA              | K02778 | ptsG       | PTS system, glucose-specific IIB component [EC:2.7.1.69]                            | 10.9   | 1.61   | 6.81   | 0.997  | 0.00669 | 6.74 | NA      | NA       | NA       |
| PTS and Galactose | DNA              | K02781 | srlB       | PTS system, glucitol/sorbitol-specific IIA component [EC:2.7.1.69]                  | 6.68   | 8.63   | 2.24   | 7.63   | 1       | 1.29 | NA      | NA       | NA       |
| PTS and Galactose | RNA              | K02781 | srlB       | PTS system, glucitol/sorbitol-specific IIA component [EC:2.7.1.69]                  | 7.19   | 17.7   | 5.79   | 25.4   | 0.97    | 2.45 | NA      | NA       | NA       |
| PTS and Galactose | DNA              | K02782 | srlE       | PTS system, glucitol/sorbitol-specific IIB component [EC:2.7.1.69]                  | 21.5   | 31.7   | 10.4   | 21.5   | 0.83    | 1.48 | NA      | NA       | NA       |
| PTS and Galactose | RNA              | K02782 | srlE       | PTS system, glucitol/sorbitol-specific IIB component [EC:2.7.1.69]                  | 1.31   | 2.06   | 0.951  | 2.09   | 0.73    | 1.57 | NA      | NA       | NA       |
| PTS and Galactose | DNA              | K02786 | lacF       | PTS system, lactose-specific IIA component [EC:2.7.1.69]                            | 5.64   | 0.919  | 2.52   | 0.262  | 0.00856 | 6.14 | NA      | NA       | NA       |
| PTS and Galactose | DNA              | K02786 | lacF       | PTS system, lactose-specific IIA component [EC:2.7.1.69]                            | 5.64   | 0.919  | 2.52   | 0.262  | 0.00856 | 6.14 | -0.0115 | -0.00482 | -0.00757 |
| PTS and Galactose | RNA              | K02786 | lacF       | PTS system, lactose-specific IIA component [EC:2.7.1.69]                            | 0.546  | 0.107  | 0.282  | 0.0923 | 0.0285  | 5.11 | NA      | NA       | NA       |
| PTS and Galactose | DNA              | K02787 | lacE       | PTS system, lactose-specific IIB component [EC:2.7.1.69]                            | 29.3   | 4.7    | 12.9   | 1.42   | 0.00856 | 6.24 | NA      | NA       | NA       |
| PTS and Galactose | DNA              | K02787 | lacE       | PTS system, lactose-specific IIB component [EC:2.7.1.69]                            | 29.3   | 4.7    | 12.9   | 1.42   | 0.00856 | 6.24 | -0.0118 | -0.00503 | -0.00798 |
| PTS and Galactose | RNA              | K02787 | lacE       | PTS system, lactose-specific IIB component [EC:2.7.1.69]                            | 1.75   | 0.235  | 1.48   | 0.169  | 0.00669 | 7.44 | NA      | NA       | NA       |
| PTS and Galactose | DNA              | K02790 | malX       | PTS system, maltose and glucose-specific IIB component [EC:2.7.1.69]                | 26.3   | 8.75   | 11.2   | 11.4   | 0.132   | 3    | -0.0124 | -0.00292 | -0.00736 |
| PTS and Galactose | RNA              | K02790 | malX       | PTS system, maltose and glucose-specific IIB component [EC:2.7.1.69]                | 6.18   | 31.3   | 6.7    | 46     | 0.204   | 5.06 | NA      | NA       | NA       |
| PTS and Galactose | DNA              | K02793 | manX       | PTS system, mannose-specific IIA component [EC:2.7.1.69]                            | 35.7   | 20     | 9.97   | 8.57   | 0.171   | 1.78 | -0.0106 | -0.00279 | -0.00595 |
| PTS and Galactose | RNA              | K02793 | manX       | PTS system, mannose-specific IIA component [EC:2.7.1.69]                            | 484    | 213    | 205    | 92.2   | 0.164   | 2.28 | -0.0315 | -0.00783 | -0.0186  |
| PTS and Galactose | DNA              | K02794 | manX       | PTS system, mannose-specific IIB component [EC:2.7.1.69]                            | 28     | 15.1   | 6.32   | 7.06   | 0.0696  | 1.86 | -0.0117 | -0.00257 | -0.00653 |
| PTS and Galactose | RNA              | K02794 | manX       | PTS system, mannose-specific IIB component [EC:2.7.1.69]                            | 149    | 152    | 91.7   | 81.7   | 0.97    | 1.02 | NA      | NA       | NA       |
| PTS and Galactose | DNA              | K02798 | mtlA       | PTS system, mannitol-specific IIA component [EC:2.7.1.69]                           | 26.5   | 32.4   | 5.23   | 17.2   | 0.968   | 1.22 | NA      | NA       | NA       |
| PTS and Galactose | RNA              | K02798 | mtlA       | PTS system, mannitol-specific IIA component [EC:2.7.1.69]                           | 5.47   | 5.81   | 2.08   | 3.55   | 0.989   | 1.06 | NA      | NA       | NA       |
| PTS and Galactose | DNA              | K02799 | mtlA       | PTS system, mannitol-specific IIB component [EC:2.7.1.69]                           | 9.09   | 10.7   | 2.28   | 7.83   | 1       | 1.18 | NA      | NA       | NA       |
| PTS and Galactose | RNA              | K02799 | mtlA       | PTS system, mannitol-specific IIB component [EC:2.7.1.69]                           | 2.53   | 2.55   | 0.651  | 2.37   | 0.424   | 1.01 | NA      | NA       | NA       |
| PTS and Galactose | DNA              | K02802 | nagE       | PTS system, N-acetylglucosamine-specific IIA component [EC:2.7.1.69]                | 2.57   | 1.4    | 1.02   | 0.669  | 0.298   | 1.83 | NA      | NA       | NA       |
| PTS and Galactose | RNA              | K02802 | nagE       | PTS system, N-acetylglucosamine-specific IIA component [EC:2.7.1.69]                | 8.89   | 4.62   | 4.14   | 2.47   | 0.164   | 1.92 | NA      | NA       | NA       |
| PTS and Galactose | DNA              | K02803 | nagE       | PTS system, N-acetylglucosamine-specific IIB component [EC:2.7.1.69]                | 10.9   | 11.4   | 2.47   | 7.61   | 0.938   | 1.05 | NA      | NA       | NA       |
| PTS and Galactose | RNA              | K02803 | nagE       | PTS system, N-acetylglucosamine-specific IIB component [EC:2.7.1.69]                | 8.46   | 6.27   | 3.88   | 4.93   | 0.312   | 1.35 | NA      | NA       | NA       |
| PTS and Galactose | DNA              | K02806 | ptsN       | PTS system, nitrogen regulatory IIA component [EC:2.7.1.69]                         | 7.57   | 8.43   | 1.8    | 3.13   | 1       | 1.11 | NA      | NA       | NA       |
| PTS and Galactose | RNA              | K02806 | ptsN       | PTS system, nitrogen regulatory IIA component [EC:2.7.1.69]                         | 12.8   | 11.6   | 6.2    | 8.14   | 0.73    | 1.1  | NA      | NA       | NA       |
| PTS and Galactose | DNA              | K02808 | scrA       | PTS system, sucrose-specific IIA component [EC:2.7.1.69]                            | 22     | 15.4   | 5.81   | 7.54   | 0.504   | 1.43 | NA      | NA       | NA       |
| PTS and Galactose | RNA              | K02808 | scrA       | PTS system, sucrose-specific IIA component [EC:2.7.1.69]                            | 60.2   | 53.9   | 25.2   | 27.4   | 0.843   | 1.12 | NA      | NA       | NA       |
| PTS and Galactose | DNA              | K02809 | scrA       | PTS system, sucrose-specific IIB component [EC:2.7.1.69]                            | 97.6   | 64.6   | 23.4   | 34     | 0.256   | 1.51 | NA      | NA       | NA       |
| PTS and Galactose | RNA              | K02809 | scrA       | PTS system, sucrose-specific IIB component [EC:2.7.1.69]                            | 246    | 240    | 124    | 143    | 0.944   | 1.03 | NA      | NA       | NA       |
| PTS and Galactose | DNA              | K02812 | sorF       | PTS system, sorbose-specific IIA component [EC:2.7.1.69]                            | 0.0075 | 0.0028 | 0.011  | 0.0041 | 0.911   | 2.7  | NA      | NA       | NA       |
| PTS and Galactose | RNA              | K02813 | sorB       | PTS system, sorbose-specific IIB component [EC:2.7.1.69]                            | 0.0869 | 0.0126 | 0.0662 | 0.0154 | 0.0954  | 6.88 | -0.0167 | -0.0031  | -0.0122  |
| PTS and Galactose | DNA              | K02813 | sorB       | PTS system, sorbose-specific IIB component [EC:2.7.1.69]                            | 0.0448 | 0.132  | 0.0474 | 0.194  | 0.843   | 2.95 | NA      | NA       | NA       |
| PTS and Galactose | RNA              | K02817 | treP       | PTS system, trehalose-specific IIA component [EC:2.7.1.69]                          | 4.66   | 1.45   | 2.55   | 0.573  | 0.0752  | 3.21 | NA      | NA       | NA       |
| PTS and Galactose | DNA              | K02817 | treP       | PTS system, trehalose-specific IIA component [EC:2.7.1.69]                          | 10.5   | 4.05   | 7.28   | 2.12   | 0.109   | 2.59 | NA      | NA       | NA       |
| PTS and Galactose | RNA              | K02818 | treB       | PTS system, trehalose-specific IIB component [EC:2.7.1.69]                          | 31.9   | 19.4   | 10.7   | 9.67   | 0.298   | 1.65 | NA      | NA       | NA       |
| PTS and Galactose | DNA              | K02818 | treB       | PTS system, trehalose-specific IIB component [EC:2.7.1.69]                          | 18.6   | 15     | 13     | 6.37   | 1       | 1.24 | NA      | NA       | NA       |
| PTS and Galactose | RNA              | K02821 | sgaA       | PTS system, ascorbate-specific IIA component [EC:2.7.1.69]                          | 8.18   | 6.17   | 1.91   | 5.01   | 0.504   | 1.33 | NA      | NA       | NA       |
| PTS and Galactose | DNA              | K02821 | sgaA       | PTS system, ascorbate-specific IIA component [EC:2.7.1.69]                          | 7.75   | 6.95   | 3.46   | 3.21   | 0.788   | 1.11 | NA      | NA       | NA       |
| PTS and Galactose | RNA              | K02822 | sgaB       | PTS system, ascorbate-specific IIB component [EC:2.7.1.69]                          | 5.57   | 4.47   | 1.38   | 3.54   | 0.563   | 1.25 | NA      | NA       | NA       |
| PTS and Galactose | DNA              | K02822 | sgaB       | PTS system, ascorbate-specific IIB component [EC:2.7.1.69]                          | 3.36   | 8.21   | 0.794  | 9.18   | 0.572   | 2.44 | NA      | NA       | NA       |
| PTS and Galactose | RNA              | K10984 | agab       | PTS system, galactosamine-specific IIB component [EC:2.7.1.69]                      | 0.929  | 0.574  | 0.624  | 0.361  | 0.731   | 1.62 | NA      | NA       | NA       |
| PTS and Galactose | DNA              | K10984 | agab       | PTS system, galactosamine-specific IIB component [EC:2.7.1.69]                      | 11.6   | 7.52   | 11.3   | 8.97   | 0.623   | 1.55 | NA      | NA       | NA       |
| PTS and Galactose | RNA              | K11191 | murP       | PTS system, N-acetylmuramic acid-specific IIB component [EC:2.7.1.69]               | 0.397  | 0.642  | 0.154  | 0.265  | 0.394   | 1.62 | NA      | NA       | NA       |
| PTS and Galactose | DNA              | K11191 | murP       | PTS system, N-acetylmuramic acid-specific IIB component [EC:2.7.1.69]               | 0.0893 | 0.0871 | 0.0454 | 0.0618 | 0.731   | 1.03 | NA      | NA       | NA       |
| PTS and Galactose | RNA              | K11198 | mngA, hrsA | PTS system, 2-O-A-mannosyl-D-glycerate-specific IIA component [EC:2.7.1.69]         | 0.106  | 0.035  | 0.0715 | 0.0278 | 0.162   | 3.04 | NA      | NA       | NA       |
| PTS and Galactose | DNA              | K11198 | mngA, hrsA | PTS system, 2-O-A-mannosyl-D-glycerate-specific IIA component [EC:2.7.1.69]         | 0.231  | 0.0206 | 0.268  | 0.031  | 0.144   | 11.2 | NA      | NA       | NA       |
| PTS and Galactose | Transcripts/gene | NA     | NA         | PTS system, 2-O-A-mannosyl-D-glycerate-specific IIA component [EC:2.7.1.69]         | 2.2    | 2.81   | 1.17   | 1.19   | 0.686   | 1.28 | NA      | NA       | NA       |
| PTS and Galactose | DNA              | K08483 | ptsI       | phosphotransferase system, enzyme I, PtsI [EC:2.7.3.9]                              | 159    | 142    | 31.2   | 35     | 0.989   | 1.12 | NA      | NA       | NA       |
| PTS and Galactose | RNA              | K08483 | ptsI       | phosphotransferase system, enzyme I, PtsI [EC:2.7.3.9]                              | 544    | 454    | 189    | 190    | 0.424   | 1.2  | NA      | NA       | NA       |
| PTS and Galactose | DNA              | K08484 | ptsP       | phosphotransferase system, enzyme I, PtsP [EC:2.7.3.9]                              | 1.22   | 2.24   | 0.456  | 0.741  | 0.127   | 1.84 | NA      | NA       | NA       |
| PTS and Galactose | RNA              | K08484 | ptsP       | phosphotransferase system, enzyme I, PtsP [EC:2.7.3.9]                              | 0.512  | 1.98   | 0.376  | 2.55   | 0.283   | 3.87 | NA      | NA       | NA       |
| PTS and Galactose | DNA              | K00965 | galT       | UDPglucose--hexose-1-phosphate uridylyltransferase [EC:2.7.7.12]                    | 113    | 98.8   | 19.9   | 24.1   | 0.968   | 1.15 | NA      | NA       | NA       |
| PTS and Galactose | RNA              | K00965 | galT       | UDPglucose--hexose-1-phosphate uridylyltransferase [EC:2.7.7.12]                    | 50.8   | 46.3   | 10.2   | 12.9   | 0.519   | 1.1  | NA      | NA       | NA       |
| PTS and Galactose | DNA              | K00963 | galU, galF | UTP--glucose-1-phosphate uridylyltransferase [EC:2.7.7.9]                           | 0.461  | 0.5    | 0.128  | 0.189  | 0.958   | 1.08 | NA      | NA       | NA       |
| PTS and Galactose | RNA              | K00963 | galU, galF | UTP--glucose-1-phosphate uridylyltransferase [EC:2.7.7.9]                           | 54.4   | 56.8   | 14.5   | 12.2   | 1       | 1.05 | NA      | NA       | NA       |
| PTS and Galactose | Transcripts/gene | NA     | NA         | UTP--glucose-1-phosphate uridylyltransferase [EC:2.7.7.9]                           | 31.1   | 30.4   | 11.9   | 10.8   | 0.989   | 1.02 | NA      | NA       | NA       |
| PTS and Galactose | DNA              | K01182 | NA         | oligo-1,6-glucosidase [EC:3.2.1.10]                                                 | 0.577  | 0.531  | 0.154  | 0.12   | 0.775   | 1.09 | NA      | NA       | NA       |
| PTS and Galactose | RNA              | K01182 | NA         | oligo-1,6-glucosidase [EC:3.2.1.10]                                                 | 93.6   | 101    | 19.7   | 36.1   | 0.938   | 1.08 | NA      | NA       | NA       |
| PTS and Galactose | DNA              | K01182 | NA         | oligo-1,6-glucosidase [EC:3.2.1.10]                                                 | 30.6   | 26.6   | 3.74   | 5.23   | 0.312   | 1.15 | NA      | NA       | NA       |
| PTS and Galactose | Transcripts/gene | NA     | SI         | sucrase-isomaltase / oligo-1,6-glucosidase [EC:3.2.1.48 3.2.1.10]                   | 0.335  | 0.301  | 0.0478 | 0.137  | 0.268   | 1.12 | NA      | NA       | NA       |

|                   |                  |        |            |                                                                   |        |        |        |        |         |      |         |          |          |
|-------------------|------------------|--------|------------|-------------------------------------------------------------------|--------|--------|--------|--------|---------|------|---------|----------|----------|
| PTS and Galactose | DNA              | K01203 | SI         | sucrase-isomaltase / oligo-1,6-glucosidase [EC:3.2.1.48 3.2.1.10] | 1.14   | 0.886  | 0.819  | 0.232  | 1       | 1.29 | NA      | NA       | NA       |
| PTS and Galactose | Transcripts/gene | NA     | LCT        | lactase-phlorizin hydrolase [EC:3.2.1.108 3.2.1.62]               | 24.5   | 19.9   | 16.2   | 17.8   | 0.775   | 1.23 | NA      | NA       | NA       |
| PTS and Galactose | DNA              | K01229 | LCT        | lactase-phlorizin hydrolase [EC:3.2.1.108 3.2.1.62]               | 0.154  | 0.271  | 0.0387 | 0.108  | 0.345   | 1.76 | NA      | NA       | NA       |
| PTS and Galactose | RNA              | K01229 | LCT        | lactase-phlorizin hydrolase [EC:3.2.1.108 3.2.1.62]               | 3.82   | 4.15   | 2.8    | 1.57   | 0.843   | 1.09 | NA      | NA       | NA       |
| PTS and Galactose | DNA              | K01187 | malZ       | alpha-glucosidase [EC:3.2.1.20]                                   | 733    | 780    | 110    | 47.7   | 0.938   | 1.06 | NA      | NA       | NA       |
| PTS and Galactose | RNA              | K01187 | malZ       | alpha-glucosidase [EC:3.2.1.20]                                   | 360    | 348    | 42.1   | 55.7   | 0.843   | 1.03 | NA      | NA       | NA       |
| PTS and Galactose | DNA              | K12316 | GAA        | lysosomal alpha-glucosidase [EC:3.2.1.20]                         | 8.6    | 7.91   | 4.82   | 1.96   | 1       | 1.09 | NA      | NA       | NA       |
| PTS and Galactose | RNA              | K12316 | GAA        | lysosomal alpha-glucosidase [EC:3.2.1.20]                         | 1.26   | 1.89   | 1.06   | 0.868  | 0.283   | 1.49 | NA      | NA       | NA       |
| PTS and Galactose | DNA              | K12317 | GANC       | neutral alpha-glucosidase C [EC:3.2.1.20]                         | 1.51   | 1.61   | 0.934  | 0.697  | 0.911   | 1.07 | NA      | NA       | NA       |
| PTS and Galactose | RNA              | K12317 | GANC       | neutral alpha-glucosidase C [EC:3.2.1.20]                         | 0.137  | 0.195  | 0.155  | 0.165  | 0.563   | 1.42 | NA      | NA       | NA       |
| PTS and Galactose | Transcripts/gene | NA     | GANC       | neutral alpha-glucosidase C [EC:3.2.1.20]                         | 0.495  | 0.445  | 0.11   | 0.0794 | 0.84    | 1.11 | NA      | NA       | NA       |
| PTS and Galactose | DNA              | K12047 | MGAM       | maltase-glucoamylase [EC:3.2.1.20 3.2.1.3]                        | 2.86   | 2.36   | 1.92   | 0.574  | 1       | 1.21 | NA      | NA       | NA       |
| PTS and Galactose | RNA              | K12047 | MGAM       | maltase-glucoamylase [EC:3.2.1.20 3.2.1.3]                        | 0.563  | 0.865  | 0.421  | 0.366  | 0.312   | 1.54 | NA      | NA       | NA       |
| PTS and Galactose | DNA              | K01189 | GLA        | alpha-galactosidase [EC:3.2.1.22]                                 | 0.0584 | 0.107  | 0.0307 | 0.0507 | 0.507   | 1.83 | NA      | NA       | NA       |
| PTS and Galactose | RNA              | K01189 | GLA        | alpha-galactosidase [EC:3.2.1.22]                                 | 0.331  | 0.562  | 0.368  | 0.209  | 0.188   | 1.69 | NA      | NA       | NA       |
| PTS and Galactose | DNA              | K07406 | meIA       | alpha-galactosidase [EC:3.2.1.22]                                 | 34.8   | 47     | 7.87   | 17.3   | 0.675   | 1.35 | NA      | NA       | NA       |
| PTS and Galactose | RNA              | K07406 | meIA       | alpha-galactosidase [EC:3.2.1.22]                                 | 44.4   | 35.7   | 32.7   | 9.01   | 0.944   | 1.25 | NA      | NA       | NA       |
| PTS and Galactose | DNA              | K07407 | galA, rafA | alpha-galactosidase [EC:3.2.1.22]                                 | 600    | 627    | 59.4   | 50.9   | 0.93    | 1.04 | NA      | NA       | NA       |
| PTS and Galactose | RNA              | K07407 | galA, rafA | alpha-galactosidase [EC:3.2.1.22]                                 | 274    | 282    | 59.1   | 57.3   | 1       | 1.03 | NA      | NA       | NA       |
| PTS and Galactose | Transcripts/gene | NA     | galA, rafA | alpha-galactosidase [EC:3.2.1.22]                                 | 0.509  | 0.479  | 0.147  | 0.105  | 0.858   | 1.06 | NA      | NA       | NA       |
| PTS and Galactose | DNA              | K01190 | lacZ       | beta-galactosidase [EC:3.2.1.23]                                  | 1910   | 1970   | 163    | 153    | 0.989   | 1.03 | NA      | NA       | NA       |
| PTS and Galactose | RNA              | K01190 | lacZ       | beta-galactosidase [EC:3.2.1.23]                                  | 868    | 790    | 124    | 152    | 0.519   | 1.1  | NA      | NA       | NA       |
| PTS and Galactose | DNA              | K12111 | cbgA       | evolved beta-galactosidase subunit alpha [EC:3.2.1.23]            | 10.7   | 8.55   | 2.11   | 0.972  | 0.563   | 1.25 | NA      | NA       | NA       |
| PTS and Galactose | RNA              | K12111 | cbgA       | evolved beta-galactosidase subunit alpha [EC:3.2.1.23]            | 2.45   | 1.86   | 0.538  | 0.267  | 0.141   | 1.32 | NA      | NA       | NA       |
| PTS and Galactose | DNA              | K12308 | bgA, lacA  | beta-galactosidase [EC:3.2.1.23]                                  | 170    | 171    | 27.8   | 30.6   | 1       | 1    | NA      | NA       | NA       |
| PTS and Galactose | RNA              | K12308 | bgA, lacA  | beta-galactosidase [EC:3.2.1.23]                                  | 109    | 92.2   | 25     | 23.3   | 0.424   | 1.18 | NA      | NA       | NA       |
| PTS and Galactose | DNA              | K12309 | GLB1       | beta-galactosidase [EC:3.2.1.23]                                  | 0.55   | 0.542  | 0.204  | 0.128  | 1       | 1.02 | NA      | NA       | NA       |
| PTS and Galactose | RNA              | K12309 | GLB1       | beta-galactosidase [EC:3.2.1.23]                                  | 0.308  | 0.341  | 0.136  | 0.171  | 0.843   | 1.11 | NA      | NA       | NA       |
| PTS and Galactose | Transcripts/gene | NA     | lacZ, GLB1 | beta-galactosidase [EC:3.2.1.23]                                  | 0.472  | 0.414  | 0.0932 | 0.0894 | 0.573   | 1.14 | NA      | NA       | NA       |
| PTS and Galactose | DNA              | K01193 | sacA       | beta-fructofuranosidase [EC:3.2.1.26]                             | 191    | 201    | 23.4   | 90.5   | 1       | 1.05 | NA      | NA       | NA       |
| PTS and Galactose | RNA              | K01193 | sacA       | beta-fructofuranosidase [EC:3.2.1.26]                             | 58.9   | 137    | 20.4   | 155    | 0.676   | 2.34 | NA      | NA       | NA       |
| PTS and Galactose | Transcripts/gene | NA     | sacA       | beta-fructofuranosidase [EC:3.2.1.26]                             | 0.313  | 0.599  | 0.118  | 0.488  | 0.625   | 1.91 | NA      | NA       | NA       |
| PTS and Galactose | Transcripts/gene | NA     | MGAM       | maltase-glucoamylase [EC:3.2.1.20 3.2.1.3]                        | 0.324  | 0.424  | 0.245  | 0.199  | 0.775   | 1.31 | NA      | NA       | NA       |
| PTS and Galactose | Transcripts/gene | NA     | SI         | sucrase-isomaltase / oligo-1,6-glucosidase [EC:3.2.1.48 3.2.1.10] | 0.873  | 0.732  | 0.929  | 0.406  | 0.958   | 1.19 | NA      | NA       | NA       |
| PTS and Galactose | RNA              | K01203 | SI         | sucrase-isomaltase / oligo-1,6-glucosidase [EC:3.2.1.48 3.2.1.10] | 0.473  | 0.607  | 0.428  | 0.281  | 0.623   | 1.28 | NA      | NA       | NA       |
| PTS and Galactose | Transcripts/gene | NA     | LCT        | lactase-phlorizin hydrolase [EC:3.2.1.108 3.2.1.62]               | 24.5   | 19.9   | 16.2   | 17.8   | 0.775   | 1.23 | NA      | NA       | NA       |
| PTS and Galactose | DNA              | K01220 | lacG       | 6-phospho-beta-galactosidase [EC:3.2.1.85]                        | 26.7   | 4.25   | 11.6   | 1.23   | 0.00856 | 6.29 | -0.0118 | -0.0052  | -0.008   |
| PTS and Galactose | RNA              | K01220 | lacG       | 6-phospho-beta-galactosidase [EC:3.2.1.85]                        | 2.08   | 0.325  | 1.42   | 0.112  | 0.00669 | 6.4  | -0.0239 | -0.00789 | -0.0151  |
| PTS and Galactose | Transcripts/gene | NA     | lacG       | 6-phospho-beta-galactosidase [EC:3.2.1.85]                        | 0.0723 | 0.0783 | 0.0257 | 0.0222 | 0.701   | 1.08 | NA      | NA       | NA       |
| PTS and Galactose | DNA              | K02079 | agaA       | N-acetylgalactosamine-6-phosphate deacetylase [EC:3.5.1.25]       | 0.359  | 0.334  | 0.157  | 0.144  | 1       | 1.07 | NA      | NA       | NA       |
| PTS and Galactose | RNA              | K02079 | agaA       | N-acetylgalactosamine-6-phosphate deacetylase [EC:3.5.1.25]       | 0.157  | 0.114  | 0.0938 | 0.0919 | 0.669   | 1.37 | NA      | NA       | NA       |
| PTS and Galactose | Transcripts/gene | NA     | agaA       | N-acetylgalactosamine-6-phosphate deacetylase [EC:3.5.1.25]       | 0.534  | 0.316  | 0.113  | 0.0625 | 0.0321  | 1.69 | NA      | NA       | NA       |
| PTS and Galactose | DNA              | K01631 | dgoA       | 2-dehydro-3-deoxyphosphogalactate aldolase [EC:4.1.2.21]          | 0.489  | 0.781  | 0.159  | 0.0973 | 0.00856 | 1.6  | 0.00568 | 0.0192   | 0.0142   |
| PTS and Galactose | RNA              | K01631 | dgoA       | 2-dehydro-3-deoxyphosphogalactate aldolase [EC:4.1.2.21]          | 0.198  | 0.188  | 0.112  | 0.087  | 1       | 1.05 | NA      | NA       | NA       |
| PTS and Galactose | Transcripts/gene | NA     | dgoA       | 2-dehydro-3-deoxyphosphogalactate aldolase [EC:4.1.2.21]          | 0.419  | 0.246  | 0.261  | 0.123  | 0.573   | 1.71 | NA      | NA       | NA       |
| PTS and Galactose | DNA              | K01635 | lacD       | tagatose 1,6-diphosphate aldolase [EC:4.1.2.40]                   | 4.39   | 2.15   | 1.67   | 0.767  | 0.0767  | 2.04 | NA      | NA       | NA       |
| PTS and Galactose | RNA              | K01635 | lacD       | tagatose 1,6-diphosphate aldolase [EC:4.1.2.40]                   | 0.324  | 0.228  | 0.235  | 0.196  | 0.519   | 1.42 | NA      | NA       | NA       |
| PTS and Galactose | DNA              | K08302 | gatY-kbaY  | tagatose 1,6-diphosphate aldolase GatY/KbaY [EC:4.1.2.40]         | 12.6   | 9.64   | 2.28   | 2.2    | 0.504   | 1.3  | NA      | NA       | NA       |
| PTS and Galactose | RNA              | K08302 | gatY-kbaY  | tagatose 1,6-diphosphate aldolase GatY/KbaY [EC:4.1.2.40]         | 6.66   | 3.84   | 1.35   | 0.741  | 0.00669 | 1.74 | -0.0333 | -0.0103  | -0.0218  |
| PTS and Galactose | Transcripts/gene | NA     | gatY-kbaY  | tagatose 1,6-diphosphate aldolase GatY/KbaY [EC:4.1.2.40]         | 0.42   | 0.365  | 0.149  | 0.119  | 0.686   | 1.18 | NA      | NA       | NA       |
| PTS and Galactose | DNA              | K01684 | dgdD       | galactate dehydratase [EC:4.2.1.6]                                | 15.5   | 21.3   | 3.69   | 3      | 0.204   | 1.37 | NA      | NA       | NA       |
| PTS and Galactose | RNA              | K01684 | dgdD       | galactate dehydratase [EC:4.2.1.6]                                | 5.2    | 4.12   | 1.24   | 1.06   | 0.283   | 1.26 | NA      | NA       | NA       |
| PTS and Galactose | Transcripts/gene | NA     | dgdD       | galactate dehydratase [EC:4.2.1.6]                                | 0.35   | 0.193  | 0.107  | 0.0378 | 0.0321  | 1.81 | NA      | NA       | NA       |
| PTS and Galactose | DNA              | K01784 | galE       | UDP-glucose 4-epimerase [EC:5.1.3.2]                              | 558    | 571    | 49.8   | 19.9   | 1       | 1.02 | NA      | NA       | NA       |
| PTS and Galactose | RNA              | K01784 | galE       | UDP-glucose 4-epimerase [EC:5.1.3.2]                              | 509    | 458    | 47.1   | 48.1   | 0.23    | 1.11 | NA      | NA       | NA       |
| PTS and Galactose | Transcripts/gene | NA     | galE       | UDP-glucose 4-epimerase [EC:5.1.3.2]                              | 0.917  | 0.802  | 0.111  | 0.0764 | 0.268   | 1.14 | NA      | NA       | NA       |
| PTS and Galactose | DNA              | K01819 | lacA, lacB | galactose-6-phosphate isomerase [EC:5.3.1.26]                     | 18.6   | 18.8   | 3.11   | 4.57   | 1       | 1.01 | NA      | NA       | NA       |
| PTS and Galactose | RNA              | K01819 | lacA, lacB | galactose-6-phosphate isomerase [EC:5.3.1.26]                     | 30.7   | 30.4   | 6.67   | 8.11   | 0.97    | 1.01 | NA      | NA       | NA       |
| PTS and Galactose | Transcripts/gene | NA     | lacA, lacB | galactose-6-phosphate isomerase [EC:5.3.1.26]                     | 1.68   | 1.73   | 0.376  | 0.734  | 0.958   | 1.03 | NA      | NA       | NA       |
| PTS and Galactose | DNA              | K01835 | pgm        | phosphoglucomutase [EC:5.4.2.2]                                   | 133    | 135    | 19     | 36.3   | 0.989   | 1.01 | NA      | NA       | NA       |
| PTS and Galactose | RNA              | K01835 | pgm        | phosphoglucomutase [EC:5.4.2.2]                                   | 280    | 328    | 84.9   | 207    | 0.895   | 1.17 | NA      | NA       | NA       |
| PTS and Galactose | Transcripts/gene | NA     | pgm        | phosphoglucomutase [EC:5.4.2.2]                                   | 2.1    | 2.36   | 0.587  | 1.07   | 0.905   | 1.12 | NA      | NA       | NA       |
| PTS and Galactose | DNA              | K02080 | agaI       | galactosamine-6-phosphate isomerase [EC:5.3.1.-]                  | 0.0895 | 0.0551 | 0.0298 | 0.0297 | 0.258   | 1.62 | NA      | NA       | NA       |
| PTS and Galactose | DNA              | K02746 | agaW       | PTS system, N-acetylgalactosamine-specific IIC component          | 10.2   | 0.769  | 4.97   | 0.387  | 0.00856 | 13.3 | -0.0117 | -0.00506 | -0.0079  |
| PTS and Galactose | DNA              | K02746 | agaW       | PTS system, N-acetylgalactosamine-specific IIC component          | 10.2   | 0.769  | 4.97   | 0.387  | 0.00856 | 13.3 | -0.0117 | -0.00506 | -0.0079  |
| PTS and Galactose | RNA              | K02746 | agaW       | PTS system, N-acetylgalactosamine-specific IIC component          | 43.5   | 2.28   | 23.4   | 2.46   | 0.00669 | 19.1 | -0.0302 | -0.0148  | -0.0239  |
| PTS and Galactose | RNA              | K02746 | agaW       | PTS system, N-acetylgalactosamine-specific IIC component          | 43.5   | 2.28   | 23.4   | 2.46   | 0.00669 | 19.1 | -0.0302 | -0.0148  | -0.0239  |
| PTS and Galactose | DNA              | K02747 | agaE       | PTS system, N-acetylgalactosamine-specific IID component          | 12.1   | 0.846  | 6.02   | 0.401  | 0.00856 | 14.3 | -0.0116 | -0.00537 | -0.00787 |
| PTS and Galactose | DNA              | K02747 | agaE       | PTS system, N-acetylgalactosamine-specific IID component          | 12.1   | 0.846  | 6.02   | 0.401  | 0.00856 | 14.3 | -0.0116 | -0.00537 | -0.00787 |
| PTS and Galactose | RNA              | K02747 | agaE       | PTS system, N-acetylgalactosamine-specific IID component          | 53.7   | 2.93   | 38.6   | 3.44   | 0.00669 | 18.3 | -0.0275 | -0.0115  | -0.0198  |
| PTS and Galactose | RNA              | K02747 | agaE       | PTS system, N-acetylgalactosamine-specific IID component          | 53.7   | 2.93   | 38.6   | 3.44   | 0.00669 | 18.3 | -0.0275 | -0.0115  | -0.0198  |
| PTS and Galactose | DNA              | K02761 | celB       | PTS system, cellobiose-specific IIC component                     | 97.8   | 27.8   | 35.2   | 8.85   | 0.0145  | 3.52 | -0.0114 | -0.00563 | -0.00804 |
| PTS and Galactose | RNA              | K02761 | celB       | PTS system, cellobiose-specific IIC component                     | 269    | 72.8   | 124    | 33.7   | 0.0191  | 3.7  | -0.0232 | -0.00335 | -0.00978 |
| PTS and Galactose | DNA              | K02770 | fruA       | PTS system, fructose-specific IIC component                       | 13.4   | 1.44   | 8.24   | 0.795  | 0.0145  | 9.31 | -0.0109 | -0.0038  | -0.0072  |
| PTS and Galactose | RNA              | K02770 | fruA       | PTS system, fructose-specific IIC component                       | 9.27   | 4.46   | 4.27   | 2.04   | 0.0819  | 2.08 | -0.0242 | -0.0057  | -0.0157  |
| PTS and Galactose | DNA              | K02771 | levG       | PTS system, fructose-specific IID component                       | 27.4   | 15.2   | 8.38   | 7.19   | 0.3     | 1.8  | NA      | NA       | NA       |
| PTS and Galactose | RNA              | K02771 | levG       | PTS system, fructose-specific IID component                       | 192    | 167    | 107    | 96.4   | 0.895   | 1.15 | NA      | NA       | NA       |
| PTS and Galactose | DNA              | K02775 | gatC       | PTS system, galactitol-specific IIC component                     | 120    | 113    | 29.2   | 25.6   | 0.989   | 1.06 | NA      | NA       | NA       |
| PTS and Galactose | DNA              | K02775 | gatC       | PTS system, galactitol-specific IIC component                     | 120    | 113    | 29.2   | 25.6   | 0.989   | 1.06 | NA      | NA       | NA       |
| PTS and Galactose | RNA              | K02775 | gatC       | PTS system, galactitol-specific IIC component                     | 163    | 141    | 44.1   | 37.5   | 0.623   | 1.15 | NA      | NA       | NA       |
| PTS and Galactose | RNA              | K02775 | gatC       | PTS system, galactitol-specific IIC component                     | 163    | 141    | 44.1   | 37.5   | 0.623   | 1.15 | NA      | NA       | NA       |
| PTS and Galactose | DNA              | K02783 | srlA       | PTS system, glucitol/sorbitol-specific IIC component              | 11.7   | 15     | 6.16   | 9.47   | 0.968   | 1.28 | NA      | NA       | NA       |
| PTS and Galactose | RNA              | K02783 | srlA       | PTS system, glucitol/sorbitol-specific IIC component              | 0.647  | 1.19   | 0.359  | 1.21   | 0.519   | 1.84 | NA      | NA       | NA       |
| PTS and Galactose | DNA              | K02784 | ptsH       | phosphocarrier protein HPt                                        | 0.244  | 0.187  | 0.148  | 0.0745 | 1       | 1.3  | NA      | NA       | NA       |

|                             |                  |        |                     |                                                                                                                                                     |         |        |         |        |         |      |         |          |          |
|-----------------------------|------------------|--------|---------------------|-----------------------------------------------------------------------------------------------------------------------------------------------------|---------|--------|---------|--------|---------|------|---------|----------|----------|
| PTS and Galactose           | RNA              | K02784 | ptsH                | phosphocarrier protein HPr                                                                                                                          | 0.536   | 0.405  | 0.526   | 0.225  | 0.97    | 1.32 | NA      | NA       | NA       |
| PTS and Galactose           | DNA              | K02788 | lacE                | PTS system, lactose-specific IIC component                                                                                                          | 0.0757  | 0.0424 | 0.0438  | 0.0316 | 0.62    | 1.78 | NA      | NA       | NA       |
| PTS and Galactose           | DNA              | K02788 | lacE                | PTS system, lactose-specific IIC component                                                                                                          | 0.0757  | 0.0424 | 0.0438  | 0.0316 | 0.62    | 1.78 | NA      | NA       | NA       |
| PTS and Galactose           | RNA              | K02788 | lacE                | PTS system, lactose-specific IIC component                                                                                                          | 0.0694  | 0.0297 | 0.106   | 0.0264 | 0.666   | 2.34 | NA      | NA       | NA       |
| PTS and Galactose           | RNA              | K02788 | lacE                | PTS system, lactose-specific IIC component                                                                                                          | 0.0694  | 0.0297 | 0.106   | 0.0264 | 0.666   | 2.34 | NA      | NA       | NA       |
| PTS and Galactose           | DNA              | K02795 | manY                | PTS system, mannose-specific IIC component                                                                                                          | 71      | 37.8   | 18.2    | 17.1   | 0.0993  | 1.88 | -0.0108 | -0.0024  | -0.00598 |
| PTS and Galactose           | RNA              | K02795 | manY                | PTS system, mannose-specific IIC component                                                                                                          | 595     | 314    | 207     | 149    | 0.102   | 1.9  | -0.0239 | -0.00343 | -0.0128  |
| PTS and Galactose           | DNA              | K02796 | manZ                | PTS system, mannose-specific IID component                                                                                                          | 50.7    | 25.3   | 13.1    | 12.1   | 0.0608  | 2.01 | -0.0121 | -0.0057  | -0.00875 |
| PTS and Galactose           | RNA              | K02796 | manZ                | PTS system, mannose-specific IID component                                                                                                          | 535     | 275    | 203     | 191    | 0.105   | 1.94 | NA      | NA       | NA       |
| PTS and Galactose           | DNA              | K02800 | mtlA                | PTS system, mannitol-specific IIC component                                                                                                         | 0.0203  | 0.0189 | 0.0152  | 0.0148 | 1       | 1.07 | NA      | NA       | NA       |
| PTS and Galactose           | DNA              | K02804 | nagE                | PTS system, N-acetylglucosamine-specific IIC component                                                                                              | 0.217   | 0.4    | 0.154   | 0.628  | 1       | 1.84 | NA      | NA       | NA       |
| PTS and Galactose           | RNA              | K02804 | nagE                | PTS system, N-acetylglucosamine-specific IIC component                                                                                              | 0.0814  | 0.515  | 0.0767  | 0.659  | 0.186   | 6.33 | NA      | NA       | NA       |
| PTS and Galactose           | DNA              | K02810 | scrA                | PTS system, sucrose-specific IIC component                                                                                                          | 0.00282 | 0.0035 | 0.00466 | 0.0033 | 0.989   | 1.24 | NA      | NA       | NA       |
| PTS and Galactose           | DNA              | K02814 | sorA                | PTS system, sorbose-specific IIC component                                                                                                          | 0.468   | 0.198  | 0.357   | 0.152  | 0.504   | 2.37 | NA      | NA       | NA       |
| PTS and Galactose           | RNA              | K02814 | sorA                | PTS system, sorbose-specific IIC component                                                                                                          | 2.64    | 1.34   | 2.09    | 1.04   | 0.471   | 1.97 | NA      | NA       | NA       |
| PTS and Galactose           | DNA              | K02815 | sorM                | PTS system, sorbose-specific IID component                                                                                                          | 0.16    | 0.0416 | 0.0985  | 0.0272 | 0.0408  | 3.85 | -0.0172 | -0.00317 | -0.0116  |
| PTS and Galactose           | RNA              | K02815 | sorM                | PTS system, sorbose-specific IID component                                                                                                          | 0.221   | 0.177  | 0.195   | 0.169  | 0.981   | 1.25 | NA      | NA       | NA       |
| PTS and Galactose           | DNA              | K03475 | ulaA, sgaT          | PTS system, ascorbate-specific IIC component                                                                                                        | 25      | 21.4   | 6.23    | 19.4   | 0.675   | 1.17 | NA      | NA       | NA       |
| PTS and Galactose           | DNA              | K03475 | ulaA, sgaT          | PTS system, ascorbate-specific IIC component                                                                                                        | 60.5    | 52.6   | 41.6    | 16.6   | 0.895   | 1.15 | NA      | NA       | NA       |
| PTS and Galactose           | RNA              | K08495 | ptsO, npr           | phosphocarrier protein NPr                                                                                                                          | 0.0143  | 0.0171 | 0.00672 | 0.0133 | 1       | 1.2  | NA      | NA       | NA       |
| PTS and Galactose           | DNA              | K10985 | agaC                | PTS system, galactosamine-specific IIC component                                                                                                    | 1.51    | 0.787  | 1.09    | 0.516  | 0.675   | 1.92 | NA      | NA       | NA       |
| PTS and Galactose           | DNA              | K10985 | agaC                | PTS system, galactosamine-specific IIC component                                                                                                    | 1.51    | 0.787  | 1.09    | 0.516  | 0.675   | 1.92 | NA      | NA       | NA       |
| PTS and Galactose           | RNA              | K10985 | agaC                | PTS system, galactosamine-specific IIC component                                                                                                    | 12.6    | 6.57   | 11.5    | 8.49   | 0.31    | 1.92 | NA      | NA       | NA       |
| PTS and Galactose           | RNA              | K10985 | agaC                | PTS system, galactosamine-specific IIC component                                                                                                    | 12.6    | 6.57   | 11.5    | 8.49   | 0.31    | 1.92 | NA      | NA       | NA       |
| PTS and Galactose           | DNA              | K10986 | agaD                | PTS system, galactosamine-specific IID component                                                                                                    | 1.48    | 0.741  | 1.09    | 0.487  | 0.45    | 2    | NA      | NA       | NA       |
| PTS and Galactose           | DNA              | K10986 | agaD                | PTS system, galactosamine-specific IID component                                                                                                    | 1.48    | 0.741  | 1.09    | 0.487  | 0.45    | 2    | NA      | NA       | NA       |
| PTS and Galactose           | RNA              | K10986 | agaD                | PTS system, galactosamine-specific IID component                                                                                                    | 21.1    | 13.8   | 20.7    | 16.7   | 0.519   | 1.53 | NA      | NA       | NA       |
| PTS and Galactose           | RNA              | K10986 | agaD                | PTS system, galactosamine-specific IID component                                                                                                    | 21.1    | 13.8   | 20.7    | 16.7   | 0.519   | 1.53 | NA      | NA       | NA       |
| PTS and Galactose           | DNA              | K11196 | levF                | PTS system, fructose-specific IIC component                                                                                                         | 0.00398 | 0.0024 | 0.00287 | 0.0026 | 1       | 1.65 | NA      | NA       | NA       |
| PTS and Galactose           | DNA              | K12112 | ebgC                | evolved beta-galactosidase subunit beta                                                                                                             | 0.266   | 0.0065 | 0.257   | 0.0058 | 0.179   | 40.8 | NA      | NA       | NA       |
| Short chain fatty acid meta | Transcripts/gene | NA     | adhE                | acetaldehyde dehydrogenase / alcohol dehydrogenase [EC:1.2.1.10 1.1.1.1]                                                                            | 0.973   | 0.885  | 0.15    | 0.135  | 0.338   | 1.1  | NA      | NA       | NA       |
| Short chain fatty acid meta | DNA              | K00074 | paaH, hbd, fadB, mr | 3-hydroxybutyryl-CoA dehydrogenase [EC:1.1.1.157]                                                                                                   | 95.1    | 68.8   | 20.7    | 17.1   | 0.131   | 1.38 | NA      | NA       | NA       |
| Short chain fatty acid meta | RNA              | K00074 | paaH, hbd, fadB, mr | 3-hydroxybutyryl-CoA dehydrogenase [EC:1.1.1.157]                                                                                                   | 325     | 139    | 46.1    | 44.6   | 0.00669 | 2.33 | -0.0288 | -0.015   | -0.024   |
| Short chain fatty acid meta | Transcripts/gene | NA     | paaH, hbd, fadB, mr | 3-hydroxybutyryl-CoA dehydrogenase [EC:1.1.1.157]                                                                                                   | 3.56    | 2.06   | 0.933   | 0.496  | 0.0291  | 1.73 | NA      | NA       | NA       |
| Short chain fatty acid meta | DNA              | K00011 | AKR1                | aldehyde reductase [EC:1.1.1.21]                                                                                                                    | 20      | 18.2   | 5.73    | 3.38   | 1       | 1.1  | NA      | NA       | NA       |
| Short chain fatty acid meta | RNA              | K00011 | AKR2                | aldehyde reductase [EC:1.1.1.21]                                                                                                                    | 8.61    | 15.1   | 6.55    | 7.18   | 0.283   | 1.75 | NA      | NA       | NA       |
| Short chain fatty acid meta | Transcripts/gene | NA     | AKR4                | aldehyde reductase [EC:1.1.1.21]                                                                                                                    | 0.469   | 0.825  | 0.354   | 0.372  | 0.183   | 1.76 | NA      | NA       | NA       |
| Short chain fatty acid meta | Transcripts/gene | NA     | HADHA               | enoyl-CoA hydratase / long-chain 3-hydroxyacyl-CoA dehydrogenase [EC:4.2.1.17 1.1.1.211]                                                            | 8.31    | 7.99   | 1.28    | 6.24   | 0.5     | 1.04 | NA      | NA       | NA       |
| Short chain fatty acid meta | Transcripts/gene | NA     | HADHA               | enoyl-CoA hydratase / long-chain 3-hydroxyacyl-CoA dehydrogenase [EC:4.2.1.17 1.1.1.211]                                                            | 8.31    | 7.99   | 1.28    | 6.24   | 0.577   | 1.04 | NA      | NA       | NA       |
| Short chain fatty acid meta | DNA              | K00016 | ldh                 | L-lactate dehydrogenase [EC:1.1.1.27]                                                                                                               | 92.8    | 62.6   | 21.2    | 13.4   | 0.0359  | 1.48 | -0.0102 | -0.00375 | -0.00691 |
| Short chain fatty acid meta | RNA              | K00016 | ldh                 | L-lactate dehydrogenase [EC:1.1.1.27]                                                                                                               | 76.6    | 193    | 14.9    | 25.9   | 0.519   | 2.52 | NA      | NA       | NA       |
| Short chain fatty acid meta | Transcripts/gene | NA     | ldh                 | L-lactate dehydrogenase [EC:1.1.1.27]                                                                                                               | 0.842   | 2.71   | 0.162   | 3.15   | 0.249   | 3.23 | NA      | NA       | NA       |
| Short chain fatty acid meta | DNA              | K03777 | dld                 | D-lactate dehydrogenase [EC:1.1.1.28]                                                                                                               | 0.2     | 0.148  | 0.152   | 0.0673 | 1       | 1.35 | NA      | NA       | NA       |
| Short chain fatty acid meta | RNA              | K03777 | dld                 | D-lactate dehydrogenase [EC:1.1.1.28]                                                                                                               | 0.167   | 0.105  | 0.176   | 0.106  | 0.736   | 1.58 | NA      | NA       | NA       |
| Short chain fatty acid meta | DNA              | K03778 | ldhA                | D-lactate dehydrogenase [EC:1.1.1.28]                                                                                                               | 73.1    | 63.3   | 12.9    | 8.7    | 0.675   | 1.15 | NA      | NA       | NA       |
| Short chain fatty acid meta | RNA              | K03778 | ldhA                | D-lactate dehydrogenase [EC:1.1.1.28]                                                                                                               | 266     | 180    | 104     | 83.7   | 0.254   | 1.48 | NA      | NA       | NA       |
| Short chain fatty acid meta | Transcripts/gene | NA     | ldhA                | D-lactate dehydrogenase [EC:1.1.1.28]                                                                                                               | 3.68    | 2.82   | 1.5     | 1.24   | 0.409   | 1.3  | NA      | NA       | NA       |
| Short chain fatty acid meta | Transcripts/gene | NA     | mcr                 | malonyl-CoA reductase / 3-hydroxypropionate dehydrogenase (NADP+) [EC:1.2.1.75 1.1.1.298]                                                           | 0.281   | 0.0914 | 0.132   | 0.0888 | 0.114   | 3.07 | NA      | NA       | NA       |
| Short chain fatty acid meta | DNA              | K00019 | bdh                 | 3-hydroxybutyrate dehydrogenase [EC:1.1.1.30]                                                                                                       | 6.87    | 5.67   | 1.58    | 0.428  | 0.127   | 1.21 | -0.0139 | -0.00723 | -0.0106  |
| Short chain fatty acid meta | RNA              | K00019 | bdh                 | 3-hydroxybutyrate dehydrogenase [EC:1.1.1.30]                                                                                                       | 2.84    | 2.81   | 0.736   | 0.677  | 0.895   | 1.01 | NA      | NA       | NA       |
| Short chain fatty acid meta | Transcripts/gene | NA     | bdh                 | 3-hydroxybutyrate dehydrogenase [EC:1.1.1.30]                                                                                                       | 0.435   | 0.494  | 0.159   | 0.11   | 0.625   | 1.14 | NA      | NA       | NA       |
| Short chain fatty acid meta | DNA              | K00004 | butB                | (R,R)-butanediol dehydrogenase / meso-butenediol dehydrogenase / diacetyl reductase [EC:1.1.1.4 1.1.1.- 1.1.1.303]                                  | 1.47    | 1.28   | 0.338   | 0.454  | 0.938   | 1.15 | NA      | NA       | NA       |
| Short chain fatty acid meta | RNA              | K03366 | butA, budC          | meso-butenediol dehydrogenase / (S,S)-butanediol dehydrogenase / diacetyl reductase [EC:1.1.1.- 1.1.1.76 1.1.1.304]                                 | 1.83    | 2.11   | 0.508   | 0.552  | 0.875   | 1.15 | NA      | NA       | NA       |
| Short chain fatty acid meta | Transcripts/gene | NA     | butA, budC          | meso-butenediol dehydrogenase / (S,S)-butanediol dehydrogenase / diacetyl reductase [EC:1.1.1.- 1.1.1.76 1.1.1.304]                                 | 1.22    | 0.447  | 0.617   | 0.0847 | 0.0211  | 2.73 | NA      | NA       | NA       |
| Short chain fatty acid meta | DNA              | K00022 | HADH                | 3-hydroxyacyl-CoA dehydrogenase [EC:1.1.1.35]                                                                                                       | 0.291   | 0.256  | 0.172   | 0.207  | 0.968   | 1.14 | NA      | NA       | NA       |
| Short chain fatty acid meta | RNA              | K00022 | HADH                | 3-hydroxyacyl-CoA dehydrogenase [EC:1.1.1.35]                                                                                                       | 0.205   | 0.185  | 0.0625  | 0.0672 | 0.574   | 1.11 | NA      | NA       | NA       |
| Short chain fatty acid meta | Transcripts/gene | NA     | HADH                | enoyl-CoA hydratase / 3-hydroxyacyl-CoA dehydrogenase / 3,2-trans-enoyl-CoA isomerase [EC:4.2.1.17 1.1.1.35 5.3.3.8]                                | 0.533   | 0.489  | 0.147   | 0.237  | 0.43    | 1.09 | NA      | NA       | NA       |
| Short chain fatty acid meta | DNA              | NA     | HADH                | enoyl-CoA hydratase / 3-hydroxyacyl-CoA dehydrogenase / 3,2-trans-enoyl-CoA isomerase [EC:4.2.1.17 1.1.1.35 5.3.3.8]                                | 0.533   | 0.489  | 0.147   | 0.237  | 0.45    | 1.09 | NA      | NA       | NA       |
| Short chain fatty acid meta | RNA              | K01782 | fadJ                | 3-hydroxyacyl-CoA dehydrogenase / enoyl-CoA hydratase / 3-hydroxybutyryl-CoA epimerase [EC:1.1.1.35 4.2.1.17 5.1.2.3]                               | 0.388   | 0.283  | 0.219   | 0.0651 | 0.989   | 1.37 | NA      | NA       | NA       |
| Short chain fatty acid meta | DNA              | K01782 | fadJ                | 3-hydroxyacyl-CoA dehydrogenase / enoyl-CoA hydratase / 3-hydroxybutyryl-CoA epimerase [EC:1.1.1.35 4.2.1.17 5.1.2.3]                               | 0.411   | 0.322  | 0.106   | 0.206  | 0.205   | 1.28 | NA      | NA       | NA       |
| Short chain fatty acid meta | RNA              | K01825 | fadB                | 3-hydroxyacyl-CoA dehydrogenase / enoyl-CoA hydratase / 3-hydroxybutyryl-CoA epimerase / enoyl-CoA isomerase [EC:1.1.1.35 4.2.1.17 5.1.2.3 5.3.3.4] | 0.194   | 0.084  | 0.198   | 0.0354 | 0.779   | 2.31 | NA      | NA       | NA       |
| Short chain fatty acid meta | DNA              | K01825 | fadB                | 3-hydroxyacyl-CoA dehydrogenase / enoyl-CoA hydratase / 3-hydroxybutyryl-CoA epimerase / enoyl-CoA isomerase [EC:1.1.1.35 4.2.1.17 5.1.2.3 5.3.3.4] | 0.487   | 0.304  | 0.287   | 0.219  | 0.381   | 1.6  | NA      | NA       | NA       |
| Short chain fatty acid meta | RNA              | K00023 | phbB                | acetoacetyl-CoA reductase [EC:1.1.1.36]                                                                                                             | 3.34    | 3.18   | 0.818   | 0.546  | 1       | 1.05 | NA      | NA       | NA       |
| Short chain fatty acid meta | DNA              | K00023 | phbB                | acetoacetyl-CoA reductase [EC:1.1.1.36]                                                                                                             | 1.61    | 1.09   | 0.764   | 0.18   | 0.254   | 1.47 | NA      | NA       | NA       |
| Short chain fatty acid meta | Transcripts/gene | NA     | phbB                | (R,R)-butanediol dehydrogenase / meso-butenediol dehydrogenase / diacetyl reductase [EC:1.1.1.4 1.1.1.- 1.1.1.303]                                  | 0.516   | 0.349  | 0.288   | 0.0628 | 0.45    | 1.48 | NA      | NA       | NA       |
| Short chain fatty acid meta | DNA              | K00024 | mdh                 | malate dehydrogenase [EC:1.1.1.37]                                                                                                                  | 163     | 152    | 12.1    | 14     | 0.504   | 1.07 | NA      | NA       | NA       |
| Short chain fatty acid meta | RNA              | K00024 | mdh                 | malate dehydrogenase [EC:1.1.1.37]                                                                                                                  | 813     | 806    | 87.1    | 152    | 0.944   | 1.01 | NA      | NA       | NA       |
| Short chain fatty acid meta | DNA              | K00025 | MDH1                | malate dehydrogenase [EC:1.1.1.37]                                                                                                                  | 0.757   | 0.761  | 0.461   | 0.262  | 1       | 1.01 | NA      | NA       | NA       |
| Short chain fatty acid meta | RNA              | K00025 | MDH1                | malate dehydrogenase [EC:1.1.1.37]                                                                                                                  | 2.54    | 1.23   | 3.81    | 0.844  | 0.623   | 2.07 | NA      | NA       | NA       |
| Short chain fatty acid meta | DNA              | K00026 | MDH2                | malate dehydrogenase [EC:1.1.1.37]                                                                                                                  | 0.0299  | 0.0724 | 0.0195  | 0.0834 | 0.779   | 2.42 | NA      | NA       | NA       |
| Short chain fatty acid meta | RNA              | K00026 | MDH2                | malate dehydrogenase [EC:1.1.1.37]                                                                                                                  | 2.7     | 1.99   | 0.918   | 0.968  | 0.382   | 1.36 | NA      | NA       | NA       |
| Short chain fatty acid meta | Transcripts/gene | NA     | MDH2                | malate dehydrogenase [EC:1.1.1.37]                                                                                                                  | 5.02    | 5.28   | 0.665   | 0.918  | 0.597   | 1.05 | NA      | NA       | NA       |
| Short chain fatty acid meta | DNA              | K00027 | sfcA, maeA          | malate dehydrogenase (oxaloacetate-decarboxylating) [EC:1.1.1.38]                                                                                   | 166     | 165    | 22.2    | 32.8   | 1       | 1.01 | NA      | NA       | NA       |
| Short chain fatty acid meta | RNA              | K00027 | sfcA, maeA          | malate dehydrogenase (oxaloacetate-decarboxylating) [EC:1.1.1.38]                                                                                   | 220     | 267    | 83.5    | 114    | 0.519   | 1.21 | NA      | NA       | NA       |
| Short chain fatty acid meta | Transcripts/gene | NA     | sfcA, maeA          | malate dehydrogenase (oxaloacetate-decarboxylating) [EC:1.1.1.38]                                                                                   | 1.35    | 1.62   | 0.547   | 0.546  | 0.558   | 1.2  | NA      | NA       | NA       |
| Short chain fatty acid meta | DNA              | K00028 | NA                  | malate dehydrogenase (decarboxylating) [EC:1.1.1.39]                                                                                                | 0.465   | 0.52   | 0.23    | 0.33   | 1       | 1.12 | NA      | NA       | NA       |
| Short chain fatty acid meta | RNA              | K00028 | NA                  | malate dehydrogenase (decarboxylating) [EC:1.1.1.39]                                                                                                | 1.21    | 1.65   | 0.589   | 0.502  | 0.256   | 1.36 | NA      | NA       | NA       |
| Short chain fatty acid meta | Transcripts/gene | NA     | NA                  | malate dehydrogenase (decarboxylating) [EC:1.1.1.39]                                                                                                | 3.35    | 3.88   | 2.2     | 1.88   | 0.786   | 1.16 | NA      | NA       | NA       |
| Short chain fatty acid meta | RNA              | K00004 | butB                | (R,R)-butanediol dehydrogenase / meso-butenediol dehydrogenase / diacetyl reductase [EC:1.1.1.4 1.1.1.- 1.1.1.303]                                  | 2.72    | 0.934  | 1.45    | 0.395  | 0.0326  | 2.91 | -0.0247 | -0.00766 | -0.0158  |
| Short chain fatty acid meta | DNA              | K03366 | butA, budC          | meso-butenediol dehydrogenase / (S,S)-butanediol dehydrogenase / diacetyl reductase [EC:1.1.1.- 1.1.1.76 1.1.1.304]                                 | 1.83    | 2.11   | 0.508   | 0.552  | 0.875   | 1.15 | NA      | NA       | NA       |
| Short chain fatty acid meta | RNA              | K03366 | butA, budC          | meso-butenediol dehydrogenase / (S,S)-butanediol dehydrogenase / diacetyl reductase [EC:1.1.1.- 1.1.1.76 1.1.1.304]                                 | 1.59    | 0.575  | 2.03    | 0.215  | 0.519   | 2.76 | NA      | NA       | NA       |
| Short chain fatty acid meta | Transcripts/gene | NA     | butA, budC          | meso-butenediol dehydrogenase / (S,S)-butanediol dehydrogenase / diacetyl reductase [EC:1.1.1.- 1.1.1.76 1.1.1.304]                                 | 1.22    | 0.447  | 0.617   | 0.0847 | 0.0211  | 2.73 | NA      | NA       | NA       |
| Short chain fatty acid meta | DNA              | K00029 | maeB                | malate dehydrogenase (oxaloacetate-decarboxylating)(NADP+) [EC:1.1.1.40]                                                                            | 175     | 177    | 31.3    | 33.3   | 1       | 1.01 | NA      | NA       | NA       |
| Short chain fatty acid meta | RNA              | K00029 | maeB                | malate dehydrogenase (oxaloacetate-decarboxylating)(NADP+) [EC:1.1.1.40]                                                                            | 268     | 203    | 39.1    | 35.2   | 0.0743  | 1.32 | NA      | NA       | NA       |

|                                              |        |                  |                                                                                                                      |        |        |        |        |         |      |         |          |          |
|----------------------------------------------|--------|------------------|----------------------------------------------------------------------------------------------------------------------|--------|--------|--------|--------|---------|------|---------|----------|----------|
| Short chain fatty acid meta Transcripts/gene | NA     | macB             | malate dehydrogenase (oxaloacetate-decarboxylating)(NADP+) [EC:1.1.1.40]                                             | 1.59   | 1.16   | 0.403  | 0.152  | 0.183   | 1.38 | NA      | NA       | NA       |
| Short chain fatty acid meta DNA              | K00043 | gbd              | 4-hydroxybutyrate dehydrogenase [EC:1.1.1.61]                                                                        | 10.4   | 5.21   | 5.31   | 1.52   | 0.133   | 1.99 | NA      | NA       | NA       |
| Short chain fatty acid meta RNA              | K00043 | gbd              | 4-hydroxybutyrate dehydrogenase [EC:1.1.1.61]                                                                        | 6.03   | 1.4    | 4.82   | 0.742  | 0.0326  | 4.3  | NA      | NA       | NA       |
| Short chain fatty acid meta Transcripts/gene | NA     | gbd              | 4-hydroxybutyrate dehydrogenase [EC:1.1.1.61]                                                                        | 0.623  | 0.257  | 0.44   | 0.0809 | 0.175   | 2.43 | NA      | NA       | NA       |
| Short chain fatty acid meta DNA              | K00048 | fucO             | lactaldehyde reductase [EC:1.1.1.77]                                                                                 | 102    | 101    | 12.8   | 20.8   | 1       | 1.02 | NA      | NA       | NA       |
| Short chain fatty acid meta RNA              | K00048 | fucO             | lactaldehyde reductase [EC:1.1.1.77]                                                                                 | 310    | 274    | 79.3   | 36.3   | 0.623   | 1.13 | NA      | NA       | NA       |
| Short chain fatty acid meta Transcripts/gene | NA     | fucO             | lactaldehyde reductase [EC:1.1.1.77]                                                                                 | 3.04   | 2.77   | 0.714  | 0.328  | 0.708   | 1.09 | NA      | NA       | NA       |
| Short chain fatty acid meta Transcripts/gene | NA     | ghrA             | glyoxylate/hydroxypyruvate reductase [EC:1.1.1.79 1.1.1.81]                                                          | 0.289  | 0.186  | 0.112  | 0.0529 | 0.183   | 1.56 | NA      | NA       | NA       |
| Short chain fatty acid meta DNA              | K00049 | GRHPR            | glyoxylate/hydroxypyruvate reductase [EC:1.1.1.79 1.1.1.81]                                                          | 0.0787 | 0.0436 | 0.0335 | 0.0134 | 0.298   | 1.8  | NA      | NA       | NA       |
| Short chain fatty acid meta DNA              | K12972 | ghrA             | glyoxylate/hydroxypyruvate reductase A [EC:1.1.1.79 1.1.1.81]                                                        | 6.24   | 5.8    | 1.35   | 2.12   | 0.968   | 1.08 | NA      | NA       | NA       |
| Short chain fatty acid meta RNA              | K12972 | ghrA             | glyoxylate/hydroxypyruvate reductase A [EC:1.1.1.79 1.1.1.81]                                                        | 1.73   | 1.01   | 0.476  | 2.12   | 0.0252  | 1.72 | NA      | NA       | NA       |
| Short chain fatty acid meta Transcripts/gene | NA     | ghrA             | glyoxylate/hydroxypyruvate reductase A [EC:1.1.1.79 1.1.1.81]                                                        | 0.976  | 0.391  | 0.798  | 0.128  | 0.163   | 2.5  | NA      | NA       | NA       |
| Short chain fatty acid meta DNA              | K00051 | NA               | malate dehydrogenase (NADP+) [EC:1.1.1.82]                                                                           | 0.192  | 0.23   | 0.111  | 0.095  | 0.675   | 1.2  | NA      | NA       | NA       |
| Short chain fatty acid meta RNA              | K00051 | NA               | malate dehydrogenase (NADP+) [EC:1.1.1.82]                                                                           | 0.0455 | 0.0746 | 0.0494 | 0.0725 | 0.676   | 1.64 | NA      | NA       | NA       |
| Short chain fatty acid meta Transcripts/gene | NA     | NA               | malate dehydrogenase (NADP+) [EC:1.1.1.82]                                                                           | 0.292  | 0.337  | 0.284  | 0.302  | 0.786   | 1.15 | NA      | NA       | NA       |
| Short chain fatty acid meta Transcripts/gene | NA     | NA               | tartrate dehydrogenase/decarboxylase / D-malate dehydrogenase [EC:1.1.1.93 4.1.1.73 1.1.1.83]                        | 0.3    | 0.203  | 0.134  | 0.1    | 0.355   | 1.47 | NA      | NA       | NA       |
| Short chain fatty acid meta DNA              | K00101 | lldD             | L-lactate dehydrogenase (cytochrome) [EC:1.1.2.3]                                                                    | 4.5    | 4.3    | 0.866  | 1.21   | 1       | 1.05 | NA      | NA       | NA       |
| Short chain fatty acid meta RNA              | K00101 | lldD             | L-lactate dehydrogenase (cytochrome) [EC:1.1.2.3]                                                                    | 2.39   | 1.68   | 0.738  | 0.593  | 0.204   | 1.43 | NA      | NA       | NA       |
| Short chain fatty acid meta Transcripts/gene | NA     | lldD             | L-lactate dehydrogenase (cytochrome) [EC:1.1.2.3]                                                                    | 0.557  | 0.4    | 0.208  | 0.138  | 0.249   | 1.39 | NA      | NA       | NA       |
| Short chain fatty acid meta DNA              | K00102 | lldL LDHD        | D-lactate dehydrogenase (cytochrome) [EC:1.1.2.4]                                                                    | 25     | 27.4   | 11.2   | 3.71   | 0.911   | 1.1  | NA      | NA       | NA       |
| Short chain fatty acid meta RNA              | K00102 | lldL LDHD        | D-lactate dehydrogenase (cytochrome) [EC:1.1.2.4]                                                                    | 10.6   | 10.2   | 4.51   | 2.31   | 0.944   | 1.03 | NA      | NA       | NA       |
| Short chain fatty acid meta Transcripts/gene | NA     | lldL LDHD        | D-lactate dehydrogenase (cytochrome) [EC:1.1.2.4]                                                                    | 0.509  | 0.372  | 0.429  | 0.0617 | 0.908   | 1.37 | NA      | NA       | NA       |
| Short chain fatty acid meta DNA              | K00114 | exaA             | alcohol dehydrogenase (cytochrome c) [EC:1.1.2.8]                                                                    | 0.0617 | 0.0341 | 0.0273 | 0.0245 | 0.394   | 1.81 | NA      | NA       | NA       |
| Short chain fatty acid meta DNA              | K00116 | mgo              | malate dehydrogenase (quinone) [EC:1.1.5.4]                                                                          | 0.226  | 0.148  | 0.165  | 0.0504 | 0.99    | 1.53 | NA      | NA       | NA       |
| Short chain fatty acid meta RNA              | K00116 | mgo              | malate dehydrogenase (quinone) [EC:1.1.5.4]                                                                          | 0.196  | 0.0776 | 0.199  | 0.0283 | 0.229   | 2.53 | NA      | NA       | NA       |
| Short chain fatty acid meta Transcripts/gene | NA     | mgo              | malate dehydrogenase (quinone) [EC:1.1.5.4]                                                                          | 0.872  | 0.556  | 0.591  | 0.19   | 0.379   | 1.57 | NA      | NA       | NA       |
| Short chain fatty acid meta DNA              | K00109 | L2HDGD           | 2-hydroxyglutarate dehydrogenase [EC:1.1.99.2]                                                                       | 0.261  | 0.123  | 0.117  | 0.0393 | 0.11    | 2.13 | NA      | NA       | NA       |
| Short chain fatty acid meta RNA              | K00109 | L2HDGD           | 2-hydroxyglutarate dehydrogenase [EC:1.1.99.2]                                                                       | 0.0749 | 0.0668 | 0.113  | 0.0527 | 0.676   | 1.12 | NA      | NA       | NA       |
| Short chain fatty acid meta Transcripts/gene | NA     | L2HDGD           | 2-hydroxyglutarate dehydrogenase [EC:1.1.99.2]                                                                       | 0.439  | 0.517  | 0.668  | 0.248  | 0.355   | 1.18 | NA      | NA       | NA       |
| Short chain fatty acid meta DNA              | K00467 | NA               | lactate 2-monooxygenase [EC:1.13.12.4]                                                                               | 1.27   | 0.184  | 0.951  | 0.0774 | 0.00856 | 6.89 | NA      | NA       | NA       |
| Short chain fatty acid meta RNA              | K00467 | NA               | lactate 2-monooxygenase [EC:1.13.12.4]                                                                               | 0.0549 | 0.051  | 0.0566 | 0.0538 | 0.901   | 1.08 | NA      | NA       | NA       |
| Short chain fatty acid meta Transcripts/gene | NA     | NA               | lactate 2-monooxygenase [EC:1.13.12.4]                                                                               | 0.0678 | 0.376  | 0.0938 | 0.515  | 0.543   | 5.54 | NA      | NA       | NA       |
| Short chain fatty acid meta DNA              | K00132 | NA               | acetaldehyde dehydrogenase (acetylating) [EC:1.2.1.10]                                                               | 6.69   | 5.34   | 1.14   | 1.79   | 0.62    | 1.25 | NA      | NA       | NA       |
| Short chain fatty acid meta RNA              | K00132 | NA               | acetaldehyde dehydrogenase (acetylating) [EC:1.2.1.10]                                                               | 10.1   | 8.28   | 3.72   | 3.06   | 0.572   | 1.23 | NA      | NA       | NA       |
| Short chain fatty acid meta DNA              | K04073 | mhpF             | acetaldehyde dehydrogenase [EC:1.2.1.10]                                                                             | 0.782  | 0.901  | 0.243  | 0.25   | 0.968   | 1.15 | NA      | NA       | NA       |
| Short chain fatty acid meta RNA              | K04073 | mhpF             | acetaldehyde dehydrogenase [EC:1.2.1.10]                                                                             | 0.487  | 0.567  | 0.463  | 0.294  | 0.518   | 1.16 | NA      | NA       | NA       |
| Short chain fatty acid meta Transcripts/gene | NA     | mhpF             | acetaldehyde dehydrogenase [EC:1.2.1.10]                                                                             | 1.2    | 0.925  | 0.138  | 0.191  | 0.163   | 1.3  | NA      | NA       | NA       |
| Short chain fatty acid meta DNA              | K04072 | adhE             | acetaldehyde dehydrogenase / alcohol dehydrogenase [EC:1.2.1.10 1.1.1.1]                                             | 194    | 192    | 21.4   | 32.8   | 1       | 1.01 | NA      | NA       | NA       |
| Short chain fatty acid meta RNA              | K04072 | adhE             | acetaldehyde dehydrogenase / alcohol dehydrogenase [EC:1.2.1.10 1.1.1.1]                                             | 232    | 172    | 50.1   | 32.8   | 0.162   | 1.35 | NA      | NA       | NA       |
| Short chain fatty acid meta DNA              | K00135 | gabD             | succinate-semialdehyde dehydrogenase / glutarate-semialdehyde dehydrogenase [EC:1.2.1.16 1.2.1.79 1.2.1.20]          | 5.49   | 5.92   | 1.08   | 1.43   | 1       | 1.08 | NA      | NA       | NA       |
| Short chain fatty acid meta RNA              | K00135 | gabD             | succinate-semialdehyde dehydrogenase / glutarate-semialdehyde dehydrogenase [EC:1.2.1.16 1.2.1.79 1.2.1.20]          | 2.44   | 2.62   | 0.753  | 0.888  | 0.944   | 1.08 | NA      | NA       | NA       |
| Short chain fatty acid meta Transcripts/gene | NA     | gabD             | succinate-semialdehyde dehydrogenase / glutarate-semialdehyde dehydrogenase [EC:1.2.1.16 1.2.1.79 1.2.1.20]          | 0.446  | 0.45   | 0.116  | 0.125  | 0.958   | 1.01 | NA      | NA       | NA       |
| Short chain fatty acid meta Transcripts/gene | NA     | mmsA, ioIA, ALDH | malonate-semialdehyde dehydrogenase (acetylating) / methylmalonate-semialdehyde dehydrogenase [EC:1.2.1.18 1.2.1.27] | 2.03   | 1.25   | 0.95   | 0.284  | 0.336   | 1.63 | NA      | NA       | NA       |
| Short chain fatty acid meta DNA              | K00140 | mmsA, ioIA, ALDH | malonate-semialdehyde dehydrogenase (acetylating) / methylmalonate-semialdehyde dehydrogenase [EC:1.2.1.18 1.2.1.27] | 11     | 6.93   | 4.15   | 1.81   | 0.185   | 1.58 | NA      | NA       | NA       |
| Short chain fatty acid meta RNA              | K00140 | mmsA, ioIA, ALDH | malonate-semialdehyde dehydrogenase (acetylating) / methylmalonate-semialdehyde dehydrogenase [EC:1.2.1.18 1.2.1.27] | 19.8   | 8.43   | 5.95   | 2.18   | 0.00669 | 2.34 | NA      | NA       | NA       |
| Short chain fatty acid meta Transcripts/gene | NA     | aldA             | lactaldehyde dehydrogenase / glycolaldehyde dehydrogenase [EC:1.2.1.22 1.2.1.21]                                     | 3.19   | 2.9    | 2.33   | 0.663  | 0.597   | 1.1  | NA      | NA       | NA       |
| Short chain fatty acid meta Transcripts/gene | NA     | aldA             | lactaldehyde dehydrogenase / glycolaldehyde dehydrogenase [EC:1.2.1.22 1.2.1.21]                                     | 3.19   | 2.9    | 2.33   | 0.663  | 0.597   | 1.1  | NA      | NA       | NA       |
| Short chain fatty acid meta DNA              | K07248 | aldA             | lactaldehyde dehydrogenase / glycolaldehyde dehydrogenase [EC:1.2.1.22 1.2.1.21]                                     | 70.4   | 79.2   | 30.1   | 21.2   | 1       | 1.12 | NA      | NA       | NA       |
| Short chain fatty acid meta RNA              | K07248 | aldA             | lactaldehyde dehydrogenase / glycolaldehyde dehydrogenase [EC:1.2.1.22 1.2.1.21]                                     | 192    | 234    | 76.5   | 21.2   | 0.676   | 1.22 | NA      | NA       | NA       |
| Short chain fatty acid meta DNA              | K00139 | ALDH5A1          | succinate-semialdehyde dehydrogenase [EC:1.2.1.24]                                                                   | 0.0298 | 0.0257 | 0.0254 | 0.0059 | 0.989   | 1.16 | NA      | NA       | NA       |
| Short chain fatty acid meta RNA              | K00139 | ALDH5A1          | succinate-semialdehyde dehydrogenase [EC:1.2.1.24]                                                                   | 0.0356 | 0.0335 | 0.0483 | 0.0314 | 0.944   | 1.08 | NA      | NA       | NA       |
| Short chain fatty acid meta Transcripts/gene | NA     | ALDH5A1          | succinate-semialdehyde dehydrogenase [EC:1.2.1.24]                                                                   | 1.85   | 1.37   | 3.23   | 1.33   | 0.895   | 1.35 | NA      | NA       | NA       |
| Short chain fatty acid meta Transcripts/gene | NA     | mmsA, ioIA, ALDH | malonate-semialdehyde dehydrogenase (acetylating) / methylmalonate-semialdehyde dehydrogenase [EC:1.2.1.18 1.2.1.27] | 2.03   | 1.25   | 0.95   | 0.284  | 0.336   | 1.63 | NA      | NA       | NA       |
| Short chain fatty acid meta DNA              | K00128 | ALDH3A2          | aldehyde dehydrogenase (NAD+) [EC:1.2.1.3]                                                                           | 109    | 74.5   | 17.3   | 16.1   | 0.0484  | 1.46 | -0.0118 | -0.0026  | -0.00727 |
| Short chain fatty acid meta RNA              | K00128 | ALDH3A2          | aldehyde dehydrogenase (NAD+) [EC:1.2.1.3]                                                                           | 70.7   | 40.3   | 38.4   | 13.3   | 0.205   | 1.75 | NA      | NA       | NA       |
| Short chain fatty acid meta Transcripts/gene | NA     | ALDH3A2          | aldehyde dehydrogenase (NAD+) [EC:1.2.1.3]                                                                           | 0.671  | 0.548  | 0.391  | 0.147  | 0.84    | 1.22 | NA      | NA       | NA       |
| Short chain fatty acid meta Transcripts/gene | NA     | ALDH7A1          | aldehyde dehydrogenase family 7 member A1 [EC:1.2.1.31 1.2.1.8 1.2.1.3]                                              | 0.229  | 0.34   | 0.143  | 0.147  | 0.323   | 1.48 | NA      | NA       | NA       |
| Short chain fatty acid meta RNA              | K14085 | ALDH7A1          | aldehyde dehydrogenase family 7 member A1 [EC:1.2.1.31 1.2.1.8 1.2.1.3]                                              | 0.0592 | 0.0875 | 0.0591 | 0.0726 | 0.853   | 1.48 | NA      | NA       | NA       |
| Short chain fatty acid meta Transcripts/gene | NA     | ALDH9A1          | aldehyde dehydrogenase family 9 member A1 [EC:1.2.1.47 1.2.1.3]                                                      | 2.73   | 0.575  | 2.25   | 0.518  | 0.184   | 4.76 | NA      | NA       | NA       |
| Short chain fatty acid meta DNA              | K00149 | ALDH9A1          | aldehyde dehydrogenase family 9 member A1 [EC:1.2.1.47 1.2.1.3]                                                      | 0.0422 | 0.031  | 0.0341 | 0.0156 | 1       | 1.36 | NA      | NA       | NA       |
| Short chain fatty acid meta RNA              | K00149 | ALDH9A1          | aldehyde dehydrogenase family 9 member A1 [EC:1.2.1.47 1.2.1.3]                                                      | 0.0812 | 0.0203 | 0.0444 | 0.0156 | 0.107   | 4    | NA      | NA       | NA       |
| Short chain fatty acid meta Transcripts/gene | NA     | ALDH7A1          | malonyl-CoA reductase / 3-hydroxypropionate dehydrogenase (NADP+) [EC:1.2.1.75 1.1.1.298]                            | 0.0235 | 0.0283 | 0.0123 | 0.0135 | 0.989   | 1.21 | NA      | NA       | NA       |
| Short chain fatty acid meta DNA              | K14468 | ALDH7A1          | aldehyde dehydrogenase family 7 member A1 [EC:1.2.1.31 1.2.1.8 1.2.1.3]                                              | 1.76   | 1.46   | 1.86   | 0.498  | 0.786   | 1.2  | NA      | NA       | NA       |
| Short chain fatty acid meta Transcripts/gene | NA     | ALDH7A1          | aldehyde dehydrogenase family 7 member A1 [EC:1.2.1.31 1.2.1.8 1.2.1.3]                                              | 1.76   | 1.46   | 1.86   | 0.498  | 0.832   | 1.2  | NA      | NA       | NA       |
| Short chain fatty acid meta DNA              | K00158 | poxL             | pyruvate oxidase [EC:1.2.3.3]                                                                                        | 5.55   | 3.14   | 1.68   | 0.746  | 0.107   | 1.77 | -0.0102 | -0.00272 | -0.00564 |
| Short chain fatty acid meta RNA              | K00158 | poxL             | pyruvate oxidase [EC:1.2.3.3]                                                                                        | 24.9   | 4.44   | 14     | 1.84   | 0.00669 | 5.6  | -0.0197 | -0.0101  | -0.0143  |
| Short chain fatty acid meta Transcripts/gene | NA     | poxL             | pyruvate oxidase [EC:1.2.3.3]                                                                                        | 4.52   | 1.46   | 1.88   | 0.587  | 0.105   | 3.1  | NA      | NA       | NA       |
| Short chain fatty acid meta DNA              | K00161 | pdhA             | pyruvate dehydrogenase E1 component subunit alpha [EC:1.2.4.1]                                                       | 7.9    | 8.66   | 2.73   | 1.97   | 0.911   | 1.1  | NA      | NA       | NA       |
| Short chain fatty acid meta RNA              | K00161 | pdhA             | pyruvate dehydrogenase E1 component subunit alpha [EC:1.2.4.1]                                                       | 19.7   | 24.6   | 13     | 11.2   | 0.676   | 1.25 | NA      | NA       | NA       |
| Short chain fatty acid meta DNA              | K00162 | pdhB             | pyruvate dehydrogenase E1 component subunit beta [EC:1.2.4.1]                                                        | 9.54   | 9.86   | 2.55   | 2.38   | 1       | 1.03 | NA      | NA       | NA       |
| Short chain fatty acid meta RNA              | K00162 | pdhB             | pyruvate dehydrogenase E1 component subunit beta [EC:1.2.4.1]                                                        | 23.3   | 27.7   | 13.9   | 14.2   | 0.791   | 1.19 | NA      | NA       | NA       |
| Short chain fatty acid meta DNA              | K00163 | aceE             | pyruvate dehydrogenase E1 component [EC:1.2.4.1]                                                                     | 0.415  | 0.311  | 0.329  | 0.0809 | 1       | 1.33 | NA      | NA       | NA       |
| Short chain fatty acid meta RNA              | K00163 | aceE             | pyruvate dehydrogenase E1 component [EC:1.2.4.1]                                                                     | 1.58   | 1.02   | 1.62   | 0.91   | 0.789   | 1.55 | NA      | NA       | NA       |
| Short chain fatty acid meta Transcripts/gene | NA     | aceE             | pyruvate dehydrogenase E1 component [EC:1.2.4.1]                                                                     | 2.79   | 2.72   | 1.98   | 0.869  | 0.764   | 1.03 | NA      | NA       | NA       |
| Short chain fatty acid meta DNA              | K00156 | poxB             | pyruvate dehydrogenase (quinone) [EC:1.2.5.1]                                                                        | 0.166  | 0.215  | 0.16   | 0.122  | 0.683   | 1.3  | NA      | NA       | NA       |
| Short chain fatty acid meta RNA              | K00156 | poxB             | pyruvate dehydrogenase (quinone) [EC:1.2.5.1]                                                                        | 0.0697 | 0.076  | 0.0764 | 0.0654 | 0.895   | 1.09 | NA      | NA       | NA       |
| Short chain fatty acid meta Transcripts/gene | NA     | poxB             | pyruvate dehydrogenase (quinone) [EC:1.2.5.1]                                                                        | 0.544  | 0.448  | 0.57   | 0.51   | 0.786   | 1.21 | NA      | NA       | NA       |
| Short chain fatty acid meta DNA              | K00169 | porA             | pyruvate ferredoxin oxidoreductase, alpha subunit [EC:1.2.7.1]                                                       | 41.2   | 45.4   | 10.8   | 9.89   | 1       | 1.1  | NA      | NA       | NA       |
| Short chain fatty acid meta RNA              | K00169 | porA             | pyruvate ferredoxin oxidoreductase, alpha subunit [EC:1.2.7.1]                                                       | 32.3   | 37.4   | 13.1   | 8.89   | 0.424   | 1.16 | NA      | NA       | NA       |
| Short chain                                  |        |                  |                                                                                                                      |        |        |        |        |         |      |         |          |          |

|                                              |        |                  |                                                                                                       |         |        |         |        |         |      |          |          |         |
|----------------------------------------------|--------|------------------|-------------------------------------------------------------------------------------------------------|---------|--------|---------|--------|---------|------|----------|----------|---------|
| Short chain fatty acid meta RNA              | K00172 | porG             | pyruvate ferredoxin oxidoreductase, gamma subunit [EC:1.2.7.1]                                        | 14.4    | 19.3   | 8.49    | 4.55   | 0.223   | 1.34 | NA       | NA       | NA      |
| Short chain fatty acid meta Transcripts/gene | NA     | porG             | pyruvate ferredoxin oxidoreductase, gamma subunit [EC:1.2.7.1]                                        | 0.755   | 0.858  | 0.265   | 0.253  | 0.558   | 1.14 | NA       | NA       | NA      |
| Short chain fatty acid meta DNA              | K10783 | NA               | NA                                                                                                    | 8.93    | 5.42   | 5.72    | 1.54   | 0.676   | 1.65 | NA       | NA       | NA      |
| Short chain fatty acid meta RNA              | K10783 | NA               | NA                                                                                                    | 6.28    | 4.78   | 3.96    | 3.28   | 0.472   | 1.31 | NA       | NA       | NA      |
| Short chain fatty acid meta Transcripts/gene | NA     | NA               | NA                                                                                                    | 0.846   | 0.868  | 0.6     | 0.495  | 0.895   | 1.03 | NA       | NA       | NA      |
| Short chain fatty acid meta DNA              | K00248 | bcd              | butyryl-CoA dehydrogenase [EC:1.3.8.1]                                                                | 77.6    | 75.7   | 14.6    | 20.1   | 1       | 1.03 | NA       | NA       | NA      |
| Short chain fatty acid meta RNA              | K00248 | bcd              | butyryl-CoA dehydrogenase [EC:1.3.8.1]                                                                | 347     | 179    | 87      | 58.7   | 0.0374  | 1.94 | -0.02    | -0.00457 | -0.0117 |
| Short chain fatty acid meta Transcripts/gene | NA     | bcd              | butyryl-CoA dehydrogenase [EC:1.3.8.1]                                                                | 4.65    | 2.46   | 1.61    | 0.747  | 0.0346  | 1.89 | NA       | NA       | NA      |
| Short chain fatty acid meta DNA              | K00249 | acd              | acyl-CoA dehydrogenase [EC:1.3.8.7]                                                                   | 6.35    | 4.75   | 2.52    | 1.24   | 0.675   | 1.34 | NA       | NA       | NA      |
| Short chain fatty acid meta RNA              | K00249 | acd              | acyl-CoA dehydrogenase [EC:1.3.8.7]                                                                   | 23.3    | 10.1   | 7.29    | 3.35   | 0.00669 | 2.31 | -0.029   | -0.0104  | -0.0239 |
| Short chain fatty acid meta Transcripts/gene | NA     | acd              | acyl-CoA dehydrogenase [EC:1.3.8.7]                                                                   | 4.04    | 2.13   | 1.25    | 0.527  | 0.0796  | 1.89 | NA       | NA       | NA      |
| Short chain fatty acid meta DNA              | K00239 | sdhA, frdA       | succinate dehydrogenase flavoprotein subunit [EC:1.3.5.1]                                             | 360     | 347    | 39      | 24.3   | 0.875   | 1.04 | NA       | NA       | NA      |
| Short chain fatty acid meta RNA              | K00239 | sdhA, frdA       | succinate dehydrogenase flavoprotein subunit [EC:1.3.5.1]                                             | 1160    | 1060   | 197     | 189    | 0.623   | 1.1  | NA       | NA       | NA      |
| Short chain fatty acid meta DNA              | K00240 | sdhB, frdB       | succinate dehydrogenase iron-sulfur subunit [EC:1.3.5.1]                                              | 139     | 135    | 15      | 11.7   | 0.989   | 1.03 | NA       | NA       | NA      |
| Short chain fatty acid meta RNA              | K00240 | sdhB, frdB       | succinate dehydrogenase iron-sulfur subunit [EC:1.3.5.1]                                              | 419     | 373    | 65.6    | 62.5   | 0.344   | 1.12 | NA       | NA       | NA      |
| Short chain fatty acid meta DNA              | K00244 | frdA             | fumarate reductase flavoprotein subunit [EC:1.3.5.4]                                                  | 154     | 118    | 29.8    | 49.7   | 0.675   | 1.31 | NA       | NA       | NA      |
| Short chain fatty acid meta RNA              | K00244 | frdA             | fumarate reductase flavoprotein subunit [EC:1.3.5.4]                                                  | 141     | 90.9   | 49.6    | 21.2   | 0.154   | 1.55 | NA       | NA       | NA      |
| Short chain fatty acid meta Transcripts/gene | K00245 | frdB             | fumarate reductase iron-sulfur subunit [EC:1.3.5.4]                                                   | 14.9    | 12.8   | 2.36    | 3.49   | 0.779   | 1.16 | NA       | NA       | NA      |
| Short chain fatty acid meta DNA              | K00245 | frdB             | fumarate reductase iron-sulfur subunit [EC:1.3.5.4]                                                   | 4.89    | 4.26   | 1.5     | 1.21   | 0.677   | 1.15 | NA       | NA       | NA      |
| Short chain fatty acid meta Transcripts/gene | NA     | frdA, frdB       | fumarate reductase iron-sulfur subunit [EC:1.3.5.4]                                                   | 2.62    | 2.51   | 0.521   | 0.456  | 0.868   | 1.04 | NA       | NA       | NA      |
| Short chain fatty acid meta RNA              | K00382 | lpl, pdhD        | dihydroliipoamide dehydrogenase [EC:1.8.1.4]                                                          | 183     | 183    | 23.2    | 11.3   | 1       | 1    | NA       | NA       | NA      |
| Short chain fatty acid meta DNA              | K00382 | lpl, pdhD        | dihydroliipoamide dehydrogenase [EC:1.8.1.4]                                                          | 121     | 118    | 26.5    | 18.1   | 0.944   | 1.03 | NA       | NA       | NA      |
| Short chain fatty acid meta Transcripts/gene | NA     | lpl, pdhD        | dihydroliipoamide dehydrogenase [EC:1.8.1.4]                                                          | 0.669   | 0.647  | 0.144   | 0.126  | 0.764   | 1.03 | NA       | NA       | NA      |
| Short chain fatty acid meta DNA              | K03416 | NA               | methylmalonyl-CoA carboxyltransferase 5S subunit [EC:2.1.3.1]                                         | 0.0116  | 0.0213 | 0.0098  | 0.0176 | 0.504   | 1.84 | NA       | NA       | NA      |
| Short chain fatty acid meta RNA              | K01652 | ilvB, ilvG, ilvI | acetylacetyl synthase I/II/III large subunit [EC:2.2.1.6]                                             | 454     | 445    | 58.7    | 51.5   | 1       | 1.02 | NA       | NA       | NA      |
| Short chain fatty acid meta DNA              | K01652 | ilvB, ilvG, ilvI | acetylacetyl synthase I/II/III large subunit [EC:2.2.1.6]                                             | 394     | 304    | 53.6    | 35.6   | 0.0526  | 1.3  | NA       | NA       | NA      |
| Short chain fatty acid meta RNA              | K01653 | ilvH, ilvN       | acetylacetyl synthase I/II small subunit [EC:2.2.1.6]                                                 | 116     | 109    | 11.5    | 8.93   | 0.779   | 1.07 | NA       | NA       | NA      |
| Short chain fatty acid meta Transcripts/gene | K01653 | ilvH, ilvN       | acetylacetyl synthase I/II small subunit [EC:2.2.1.6]                                                 | 101     | 83.3   | 19.7    | 8.28   | 0.233   | 1.21 | NA       | NA       | NA      |
| Short chain fatty acid meta DNA              | NA     | ilvH, ilvN       | acetylacetyl synthase I/II small subunit [EC:2.2.1.6]                                                 | 0.88    | 0.706  | 0.164   | 0.102  | 0.114   | 1.25 | NA       | NA       | NA      |
| Short chain fatty acid meta RNA              | K00627 | aceF, pdhC       | pyruvate dehydrogenase E2 component (dihydroliipoamide acetyltransferase) [EC:2.3.1.12]               | 14.2    | 17.1   | 3.11    | 4.52   | 0.675   | 1.2  | NA       | NA       | NA      |
| Short chain fatty acid meta Transcripts/gene | K00627 | aceF, pdhC       | pyruvate dehydrogenase E2 component (dihydroliipoamide acetyltransferase) [EC:2.3.1.12]               | 17.9    | 21.8   | 6.77    | 6.03   | 0.424   | 1.22 | NA       | NA       | NA      |
| Short chain fatty acid meta DNA              | NA     | aceF, pdhC       | pyruvate dehydrogenase E2 component (dihydroliipoamide acetyltransferase) [EC:2.3.1.12]               | 1.36    | 1.27   | 0.646   | 0.0789 | 1       | 1.07 | NA       | NA       | NA      |
| Short chain fatty acid meta RNA              | K00634 | ptb              | phosphate butyryltransferase [EC:2.3.1.19]                                                            | 114     | 128    | 8.87    | 7.96   | 0.113   | 1.12 | NA       | NA       | NA      |
| Short chain fatty acid meta Transcripts/gene | K00634 | ptb              | phosphate butyryltransferase [EC:2.3.1.19]                                                            | 101     | 85.3   | 20.5    | 9.35   | 0.204   | 1.18 | NA       | NA       | NA      |
| Short chain fatty acid meta DNA              | NA     | ptb              | phosphate butyryltransferase [EC:2.3.1.19]                                                            | 0.883   | 0.667  | 0.178   | 0.0811 | 0.0291  | 1.32 | NA       | NA       | NA      |
| Short chain fatty acid meta RNA              | K13923 | pduL             | phosphate propanoyltransferase [EC:2.3.1.222]                                                         | 1.4     | 1.34   | 0.297   | 0.287  | 1       | 1.04 | NA       | NA       | NA      |
| Short chain fatty acid meta Transcripts/gene | K13923 | pduL             | phosphate propanoyltransferase [EC:2.3.1.222]                                                         | 1.21    | 1.29   | 0.401   | 0.492  | 0.944   | 1.07 | NA       | NA       | NA      |
| Short chain fatty acid meta DNA              | NA     | pduL             | phosphate propanoyltransferase [EC:2.3.1.222]                                                         | 0.884   | 0.941  | 0.285   | 0.197  | 0.832   | 1.07 | NA       | NA       | NA      |
| Short chain fatty acid meta RNA              | K00656 | pfID             | formate C-acetyltransferase [EC:2.3.1.54]                                                             | 425     | 335    | 76.8    | 42.8   | 0.0738  | 1.27 | NA       | NA       | NA      |
| Short chain fatty acid meta Transcripts/gene | K00656 | pfID             | formate C-acetyltransferase [EC:2.3.1.54]                                                             | 753     | 648    | 192     | 268    | 0.623   | 1.16 | NA       | NA       | NA      |
| Short chain fatty acid meta DNA              | NA     | pfID             | formate C-acetyltransferase [EC:2.3.1.54]                                                             | 1.8     | 1.97   | 0.5     | 0.86   | 0.832   | 1.1  | NA       | NA       | NA      |
| Short chain fatty acid meta RNA              | K00625 | pta              | phosphate acetyltransferase [EC:2.3.1.8]                                                              | 244     | 256    | 19.7    | 16.3   | 0.779   | 1.05 | NA       | NA       | NA      |
| Short chain fatty acid meta Transcripts/gene | K00625 | pta              | phosphate acetyltransferase [EC:2.3.1.8]                                                              | 652     | 545    | 131     | 61     | 0.312   | 1.19 | NA       | NA       | NA      |
| Short chain fatty acid meta DNA              | K13788 | pta              | phosphate acetyltransferase [EC:2.3.1.8]                                                              | 11.4    | 8.19   | 7.07    | 1.84   | 0.968   | 1.4  | NA       | NA       | NA      |
| Short chain fatty acid meta RNA              | K13788 | pta              | phosphate acetyltransferase [EC:2.3.1.8]                                                              | 10.2    | 7.36   | 4.02    | 1.5    | 0.344   | 1.38 | NA       | NA       | NA      |
| Short chain fatty acid meta Transcripts/gene | K15024 | pduL             | putative phosphotransacetylase [EC:2.3.1.8]                                                           | 22.2    | 17.9   | 5.4     | 4.7    | 0.513   | 1.24 | NA       | NA       | NA      |
| Short chain fatty acid meta DNA              | K15024 | pduL             | putative phosphotransacetylase [EC:2.3.1.8]                                                           | 46.3    | 40.3   | 9.41    | 13.2   | 0.62    | 1.15 | NA       | NA       | NA      |
| Short chain fatty acid meta Transcripts/gene | NA     | pduL             | putative phosphotransacetylase [EC:2.3.1.8]                                                           | 2.6     | 2.11   | 0.72    | 0.211  | 0.409   | 1.24 | NA       | NA       | NA      |
| Short chain fatty acid meta RNA              | K00626 | atoB             | acetyl-CoA C-acetyltransferase [EC:2.3.1.9]                                                           | 109     | 107    | 19.6    | 22.1   | 1       | 1.01 | NA       | NA       | NA      |
| Short chain fatty acid meta Transcripts/gene | K00626 | atoB             | acetyl-CoA C-acetyltransferase [EC:2.3.1.9]                                                           | 461     | 146    | 255     | 40.7   | 0.0191  | 3.17 | -0.0253  | -0.00446 | -0.018  |
| Short chain fatty acid meta DNA              | NA     | atoB             | acetyl-CoA C-acetyltransferase [EC:2.3.1.9]                                                           | 4.21    | 1.41   | 1.93    | 0.448  | 0.0419  | 2.99 | NA       | NA       | NA      |
| Short chain fatty acid meta RNA              | K01641 | HMGCS1, HMGCS    | hydroxymethylglutaryl-CoA synthase [EC:2.3.3.10]                                                      | 2.53    | 2.38   | 1.38    | 0.379  | 1       | 1.06 | NA       | NA       | NA      |
| Short chain fatty acid meta Transcripts/gene | K01641 | HMGCS1, HMGCS    | hydroxymethylglutaryl-CoA synthase [EC:2.3.3.10]                                                      | 0.169   | 0.418  | 0.0794  | 0.174  | 0.102   | 2.47 | NA       | NA       | NA      |
| Short chain fatty acid meta DNA              | NA     | HMGCS1, HMGCS    | hydroxymethylglutaryl-CoA synthase [EC:2.3.3.10]                                                      | 0.0889  | 0.174  | 0.0703  | 0.0676 | 0.101   | 1.96 | NA       | NA       | NA      |
| Short chain fatty acid meta RNA              | K01649 | leuA             | 2-isopropylmalate synthase [EC:2.3.3.13]                                                              | 329     | 326    | 38.2    | 34.1   | 1       | 1.01 | NA       | NA       | NA      |
| Short chain fatty acid meta Transcripts/gene | K01649 | leuA             | 2-isopropylmalate synthase [EC:2.3.3.13]                                                              | 304     | 249    | 58      | 48.9   | 0.382   | 1.22 | NA       | NA       | NA      |
| Short chain fatty acid meta DNA              | NA     | leuA             | 2-isopropylmalate synthase [EC:2.3.3.13]                                                              | 0.933   | 0.779  | 0.209   | 0.206  | 0.338   | 1.2  | NA       | NA       | NA      |
| Short chain fatty acid meta RNA              | K01655 | LYS20, LYS21     | homocitrate synthase [EC:2.3.3.14]                                                                    | 5.92    | 8.01   | 2.44    | 1.71   | 0.504   | 1.35 | NA       | NA       | NA      |
| Short chain fatty acid meta Transcripts/gene | K01655 | LYS20, LYS21     | homocitrate synthase [EC:2.3.3.14]                                                                    | 1.06    | 1.13   | 0.27    | 0.244  | 0.788   | 1.06 | NA       | NA       | NA      |
| Short chain fatty acid meta DNA              | K10977 | aksA             | methanogen homocitrate synthase [EC:2.3.3.14 2.3.3.-]                                                 | 6.15    | 7.03   | 1.46    | 2.68   | 0.83    | 1.14 | NA       | NA       | NA      |
| Short chain fatty acid meta RNA              | K10977 | aksA             | methanogen homocitrate synthase [EC:2.3.3.14 2.3.3.-]                                                 | 0.28    | 0.884  | 0.151   | 0.593  | 0.121   | 3.16 | NA       | NA       | NA      |
| Short chain fatty acid meta Transcripts/gene | NA     | aksA             | methanogen homocitrate synthase [EC:2.3.3.14 2.3.3.-]                                                 | 0.112   | 0.155  | 0.0191  | 0.105  | 0.652   | 1.38 | NA       | NA       | NA      |
| Short chain fatty acid meta DNA              | K01659 | prpC             | 2-methylcitrate synthase [EC:2.3.3.5]                                                                 | 1.95    | 1.81   | 0.998   | 0.438  | 1       | 1.08 | NA       | NA       | NA      |
| Short chain fatty acid meta RNA              | K01659 | prpC             | 2-methylcitrate synthase [EC:2.3.3.5]                                                                 | 1.96    | 1.63   | 0.669   | 0.579  | 0.572   | 1.2  | 0.000745 | 0.0259   | 0.0191  |
| Short chain fatty acid meta Transcripts/gene | NA     | prpC             | 2-methylcitrate synthase [EC:2.3.3.5]                                                                 | 1.26    | 0.935  | 0.914   | 0.357  | 0.832   | 1.35 | NA       | NA       | NA      |
| Short chain fatty acid meta DNA              | K01638 | aceB, glcB       | malate synthase [EC:2.3.3.9]                                                                          | 0.324   | 0.147  | 0.17    | 0.043  | 0.0954  | 2.2  | NA       | NA       | NA      |
| Short chain fatty acid meta RNA              | K01638 | aceB, glcB       | malate synthase [EC:2.3.3.9]                                                                          | 0.407   | 0.13   | 0.221   | 0.131  | 0.0727  | 3.14 | NA       | NA       | NA      |
| Short chain fatty acid meta Transcripts/gene | NA     | aceB, glcB       | malate synthase [EC:2.3.3.9]                                                                          | 1.65    | 0.918  | 1.24    | 1.01   | 0.409   | 1.8  | NA       | NA       | NA      |
| Short chain fatty acid meta DNA              | K00822 | NA               | beta-alanine-pyruvate transaminase [EC:2.6.1.18]                                                      | 0.052   | 0.0837 | 0.024   | 0.0426 | 0.62    | 1.61 | NA       | NA       | NA      |
| Short chain fatty acid meta RNA              | K00822 | NA               | beta-alanine-pyruvate transaminase [EC:2.6.1.18]                                                      | 0.0241  | 0.0178 | 0.0233  | 0.0153 | 0.73    | 1.35 | NA       | NA       | NA      |
| Short chain fatty acid meta Transcripts/gene | NA     | NA               | beta-alanine-pyruvate transaminase [EC:2.6.1.18]                                                      | 0.6     | 0.252  | 0.602   | 0.227  | 0.492   | 2.38 | NA       | NA       | NA      |
| Short chain fatty acid meta DNA              | K00823 | puuE             | 4-aminobutyrate aminotransferase [EC:2.6.1.19]                                                        | 12.5    | 11.9   | 3.82    | 11.6   | 0.563   | 1.05 | NA       | NA       | NA      |
| Short chain fatty acid meta RNA              | K00823 | puuE             | 4-aminobutyrate aminotransferase [EC:2.6.1.19]                                                        | 9.59    | 12.4   | 3.55    | 5.44   | 0.519   | 1.29 | NA       | NA       | NA      |
| Short chain fatty acid meta Transcripts/gene | K07250 | gabT             | 4-aminobutyrate aminotransferase / (S)-3-amino-2-methylpropionate transaminase [EC:2.6.1.19 2.6.1.22] | 8.56    | 3.77   | 3.85    | 0.937  | 0.0608  | 2.27 | -0.0169  | -0.00192 | -0.0093 |
| Short chain fatty acid meta DNA              | NA     | gabT             | 4-aminobutyrate aminotransferase / (S)-3-amino-2-methylpropionate transaminase [EC:2.6.1.19 2.6.1.22] | 0.588   | 1.01   | 0.349   | 0.448  | 0.0829  | 1.71 | NA       | NA       | NA      |
| Short chain fatty acid meta RNA              | K07250 | gabT             | 4-aminobutyrate aminotransferase / (S)-3-amino-2-methylpropionate transaminase [EC:2.6.1.19 2.6.1.22] | 1.42    | 1.11   | 0.792   | 0.332  | 0.623   | 1.29 | NA       | NA       | NA      |
| Short chain fatty acid meta Transcripts/gene | K13524 | ABAT             | 4-aminobutyrate aminotransferase / (S)-3-amino-2-methylpropionate transaminase [EC:2.6.1.19 2.6.1.22] | 0.00339 | 0.0035 | 0.00399 | 0.0022 | 1       | 1.04 | NA       | NA       | NA      |
| Short chain fatty acid meta DNA              | K00823 | puuE             | 4-aminobutyrate aminotransferase / (S)-3-amino-2-methylpropionate transaminase [EC:2.6.1.19 2.6.1.22] | 8.56    | 3.77   | 3.85    | 0.937  | 0.0608  | 2.27 | -0.0169  | -0.00192 | -0.0093 |
| Short chain fatty acid meta RNA              | NA     | gabT             | 4-aminobutyrate aminotransferase / (S)-3-amino-2-methylpropionate transaminase [EC:2.6.1.19 2.6.1.22] | 0.182   | 0.302  | 0.0858  | 0.0736 | 0.147   | 1.66 | NA       | NA       | NA      |
| Short chain fatty acid meta Transcripts/gene | NA     | gabT             | 4-aminobutyrate aminotransferase / (S)-3-amino-2-methylpropionate transaminase [EC:2.6.1.19 2.6.1.22] | 0.182   | 0.302  | 0.0858  | 0.0736 | 0.0829  | 1.66 | NA       | NA       | NA      |
| Short chain fatty acid meta DNA              | K00873 | pyk              | pyruvate kinase [EC:2.7.1.40]                                                                         | 214     | 208    | 31.7    | 31.1   | 1       | 1.03 | NA       | NA       | NA      |
| Short chain fatty acid meta RNA              | K00873 | pyk              | pyruvate kinase [EC:2.7.1.40]                                                                         | 234     | 170    | 69      | 42.9   | 0.139   | 1.38 | NA       | NA       | NA      |

|                                              |        |                  |                                                                                               |         |        |         |        |         |      |         |          |         |
|----------------------------------------------|--------|------------------|-----------------------------------------------------------------------------------------------|---------|--------|---------|--------|---------|------|---------|----------|---------|
| Short chain fatty acid meta Transcripts/gene | NA     | pyk              | pyruvate kinase [EC:2.7.1.40]                                                                 | 1.09    | 0.813  | 0.203   | 0.141  | 0.163   | 1.33 | NA      | NA       | NA      |
| Short chain fatty acid meta DNA              | K00925 | ackA             | acetate kinase [EC:2.7.2.1]                                                                   | 352     | 335    | 30.7    | 17.2   | 0.878   | 1.05 | NA      | NA       | NA      |
| Short chain fatty acid meta RNA              | K00925 | ackA             | acetate kinase [EC:2.7.2.1]                                                                   | 847     | 719    | 141     | 112    | 0.231   | 1.18 | NA      | NA       | NA      |
| Short chain fatty acid meta Transcripts/gene | NA     | ackA             | acetate kinase [EC:2.7.2.1]                                                                   | 2.43    | 2.14   | 0.524   | 0.254  | 0.37    | 1.14 | NA      | NA       | NA      |
| Short chain fatty acid meta DNA              | K00932 | tdcD, pduW       | propionate kinase [EC:2.7.2.15]                                                               | 0.0288  | 0.0358 | 0.015   | 0.0125 | 0.911   | 1.24 | NA      | NA       | NA      |
| Short chain fatty acid meta RNA              | K00932 | tdcD, pduW       | propionate kinase [EC:2.7.2.15]                                                               | 0.416   | 0.313  | 0.206   | 0.18   | 0.573   | 1.33 | NA      | NA       | NA      |
| Short chain fatty acid meta Transcripts/gene | NA     | tdcD, pduW       | propionate kinase [EC:2.7.2.15]                                                               | 16.8    | 10.7   | 8.61    | 7.79   | 0.43    | 1.57 | NA      | NA       | NA      |
| Short chain fatty acid meta DNA              | K00929 | buk              | butyrate kinase [EC:2.7.2.7]                                                                  | 145     | 166    | 21.8    | 12.1   | 0.302   | 1.15 | NA      | NA       | NA      |
| Short chain fatty acid meta RNA              | K00929 | buk              | butyrate kinase [EC:2.7.2.7]                                                                  | 105     | 78.4   | 22.2    | 10.5   | 0.0715  | 1.34 | NA      | NA       | NA      |
| Short chain fatty acid meta Transcripts/gene | NA     | buk              | butyrate kinase [EC:2.7.2.7]                                                                  | 0.745   | 0.476  | 0.234   | 0.0905 | 0.0611  | 1.56 | NA      | NA       | NA      |
| Short chain fatty acid meta DNA              | K01006 | ppdK             | pyruvate, orthophosphate dikinase [EC:2.7.9.1]                                                | 665     | 700    | 36.6    | 29.7   | 0.565   | 1.05 | NA      | NA       | NA      |
| Short chain fatty acid meta RNA              | K01006 | ppdK             | pyruvate, orthophosphate dikinase [EC:2.7.9.1]                                                | 4850    | 4680   | 494     | 532    | 0.47    | 1.04 | NA      | NA       | NA      |
| Short chain fatty acid meta Transcripts/gene | NA     | ppdK             | pyruvate, orthophosphate dikinase [EC:2.7.9.1]                                                | 7.31    | 6.69   | 0.87    | 0.709  | 0.314   | 1.09 | NA      | NA       | NA      |
| Short chain fatty acid meta DNA              | K01007 | pps, ppsA        | pyruvate, water dikinase [EC:2.7.9.2]                                                         | 83.6    | 88.7   | 13.6    | 18.6   | 0.989   | 1.06 | NA      | NA       | NA      |
| Short chain fatty acid meta RNA              | K01007 | pps, ppsA        | pyruvate, water dikinase [EC:2.7.9.2]                                                         | 75      | 45     | 43.7    | 2.95   | 0.0984  | 1.67 | NA      | NA       | NA      |
| Short chain fatty acid meta Transcripts/gene | NA     | pps, ppsA        | pyruvate, water dikinase [EC:2.7.9.2]                                                         | 0.886   | 0.53   | 0.444   | 0.128  | 0.183   | 1.67 | NA      | NA       | NA      |
| Short chain fatty acid meta DNA              | K01026 | pct              | propionate CoA-transferase [EC:2.8.3.1]                                                       | 34.5    | 23.4   | 10.8    | 8.29   | 0.563   | 1.48 | NA      | NA       | NA      |
| Short chain fatty acid meta RNA              | K01026 | pct              | propionate CoA-transferase [EC:2.8.3.1]                                                       | 40.3    | 16.4   | 14.6    | 6.65   | 0.0326  | 2.45 | -0.0226 | -0.00555 | -0.0146 |
| Short chain fatty acid meta Transcripts/gene | NA     | pct              | propionate CoA-transferase [EC:2.8.3.1]                                                       | 1.32    | 0.732  | 0.77    | 0.269  | 0.223   | 1.8  | NA      | NA       | NA      |
| Short chain fatty acid meta DNA              | K01039 | gctA             | glutaconate CoA-transferase, subunit A [EC:2.8.3.12]                                          | 3.03    | 3.36   | 0.351   | 1.27   | 0.731   | 1.11 | NA      | NA       | NA      |
| Short chain fatty acid meta RNA              | K01039 | gctA             | glutaconate CoA-transferase, subunit A [EC:2.8.3.12]                                          | 17.5    | 16     | 7.63    | 5.78   | 0.972   | 1.09 | NA      | NA       | NA      |
| Short chain fatty acid meta DNA              | K01040 | gctB             | glutaconate CoA-transferase, subunit B [EC:2.8.3.12]                                          | 2.61    | 2.93   | 0.322   | 1.07   | 0.779   | 1.12 | NA      | NA       | NA      |
| Short chain fatty acid meta RNA              | K01040 | gctB             | glutaconate CoA-transferase, subunit B [EC:2.8.3.12]                                          | 13.2    | 13.2   | 4.51    | 4.66   | 0.971   | 1    | NA      | NA       | NA      |
| Short chain fatty acid meta Transcripts/gene | NA     | gctB             | glutaconate CoA-transferase, subunit B [EC:2.8.3.12]                                          | 5.62    | 4.76   | 2.66    | 0.932  | 0.895   | 1.18 | NA      | NA       | NA      |
| Short chain fatty acid meta DNA              | K01027 | OXCT             | 3-oxoacid CoA-transferase [EC:2.8.3.5]                                                        | 0.179   | 0.327  | 0.0492  | 0.138  | 0.0993  | 1.83 | NA      | NA       | NA      |
| Short chain fatty acid meta RNA              | K01027 | OXCT             | 3-oxoacid CoA-transferase [EC:2.8.3.5]                                                        | 0.636   | 0.732  | 0.312   | 0.434  | 0.989   | 1.15 | NA      | NA       | NA      |
| Short chain fatty acid meta DNA              | K01028 | scoA             | 3-oxoacid CoA-transferase subunit A [EC:2.8.3.5]                                              | 9.1     | 10.9   | 2.4     | 2.3    | 0.83    | 1.2  | NA      | NA       | NA      |
| Short chain fatty acid meta RNA              | K01028 | scoA             | 3-oxoacid CoA-transferase subunit A [EC:2.8.3.5]                                              | 1.72    | 1.56   | 0.629   | 0.427  | 0.895   | 1.1  | NA      | NA       | NA      |
| Short chain fatty acid meta DNA              | K01029 | scoB             | 3-oxoacid CoA-transferase subunit B [EC:2.8.3.5]                                              | 6.56    | 9.9    | 1.62    | 3      | 0.208   | 1.51 | NA      | NA       | NA      |
| Short chain fatty acid meta RNA              | K01029 | scoB             | 3-oxoacid CoA-transferase subunit B [EC:2.8.3.5]                                              | 16.9    | 20.6   | 4.23    | 5.19   | 0.283   | 1.22 | NA      | NA       | NA      |
| Short chain fatty acid meta Transcripts/gene | NA     | scoA/scoB        | 3-oxoacid CoA-transferase subunit B [EC:2.8.3.5]                                              | 1.24    | 1.1    | 0.345   | 0.217  | 0.625   | 1.13 | NA      | NA       | NA      |
| Short chain fatty acid meta DNA              | K01034 | atoD             | acetate CoA/acetoacetate CoA-transferase alpha subunit [EC:2.8.3.8 2.8.3.9]                   | 7.32    | 10.6   | 1.87    | 3.29   | 0.252   | 1.45 | NA      | NA       | NA      |
| Short chain fatty acid meta RNA              | K01034 | atoD             | acetate CoA/acetoacetate CoA-transferase alpha subunit [EC:2.8.3.8 2.8.3.9]                   | 29.7    | 20.4   | 14      | 4.59   | 0.519   | 1.46 | NA      | NA       | NA      |
| Short chain fatty acid meta DNA              | K01035 | atoA             | acetate CoA/acetoacetate CoA-transferase beta subunit [EC:2.8.3.8 2.8.3.9]                    | 1.17    | 1.91   | 0.153   | 0.551  | 0.176   | 1.64 | NA      | NA       | NA      |
| Short chain fatty acid meta RNA              | K01035 | atoA             | acetate CoA/acetoacetate CoA-transferase beta subunit [EC:2.8.3.8 2.8.3.9]                    | 4.27    | 4.74   | 1.12    | 1.71   | 0.843   | 1.11 | NA      | NA       | NA      |
| Short chain fatty acid meta Transcripts/gene | NA     | atoA             | acetate CoA/acetoacetate CoA-transferase beta subunit [EC:2.8.3.8 2.8.3.9]                    | 3.94    | 2.05   | 0.957   | 0.357  | 0.0419  | 1.92 | NA      | NA       | NA      |
| Short chain fatty acid meta DNA              | K07518 | NA               | hydroxybutyrate-dimer hydrolase [EC:3.1.1.22]                                                 | 0.00675 | 0.003  | 0.00717 | 0.0052 | 0.641   | 2.28 | NA      | NA       | NA      |
| Short chain fatty acid meta RNA              | K05973 | phaZ             | poly(3-hydroxybutyrate) depolymerase [EC:3.1.1.75]                                            | 0.103   | 0.161  | 0.0954  | 0.0703 | 0.45    | 1.56 | NA      | NA       | NA      |
| Short chain fatty acid meta DNA              | K01067 | ACH1             | acetyl-CoA hydrolase [EC:3.1.2.1]                                                             | 87.7    | 84     | 15.1    | 18.5   | 0.989   | 1.04 | NA      | NA       | NA      |
| Short chain fatty acid meta RNA              | K01067 | ACH1             | acetyl-CoA hydrolase [EC:3.1.2.1]                                                             | 236     | 181    | 40.2    | 43.6   | 0.188   | 1.3  | NA      | NA       | NA      |
| Short chain fatty acid meta Transcripts/gene | NA     | ACH1             | acetyl-CoA hydrolase [EC:3.1.2.1]                                                             | 2.75    | 2.2    | 0.671   | 0.535  | 0.338   | 1.25 | NA      | NA       | NA      |
| Short chain fatty acid meta DNA              | K05605 | HIBCH            | 3-hydroxyisobutyryl-CoA hydrolase [EC:3.1.2.4]                                                | 0.0076  | 0.0306 | 0.00806 | 0.0199 | 0.11    | 4.02 | NA      | NA       | NA      |
| Short chain fatty acid meta RNA              | K01069 | gloB             | hydroxyacylglutathione hydrolase [EC:3.1.2.6]                                                 | 95.7    | 97     | 10.9    | 8.1    | 0.938   | 1.01 | NA      | NA       | NA      |
| Short chain fatty acid meta DNA              | K01069 | gloB             | hydroxyacylglutathione hydrolase [EC:3.1.2.6]                                                 | 18.5    | 16.5   | 3.01    | 1.73   | 0.283   | 1.12 | NA      | NA       | NA      |
| Short chain fatty acid meta Transcripts/gene | NA     | gloB             | hydroxyacylglutathione hydrolase [EC:3.1.2.6]                                                 | 0.195   | 0.171  | 0.04    | 0.0164 | 0.537   | 1.15 | NA      | NA       | NA      |
| Short chain fatty acid meta DNA              | K01505 | NA               | 1-aminocyclopropane-1-carboxylate deaminase [EC:3.5.99.7]                                     | 0.709   | 1.01   | 0.286   | 0.412  | 0.731   | 1.43 | NA      | NA       | NA      |
| Short chain fatty acid meta RNA              | K01505 | NA               | 1-aminocyclopropane-1-carboxylate deaminase [EC:3.5.99.7]                                     | 0.299   | 0.39   | 0.145   | 0.189  | 0.623   | 1.31 | NA      | NA       | NA      |
| Short chain fatty acid meta Transcripts/gene | NA     | NA               | 1-aminocyclopropane-1-carboxylate deaminase [EC:3.5.99.7]                                     | 0.473   | 0.393  | 0.275   | 0.16   | 0.832   | 1.2  | NA      | NA       | NA      |
| Short chain fatty acid meta DNA              | K01512 | acpP             | acylphosphatase [EC:3.6.1.7]                                                                  | 18.5    | 18.3   | 1.97    | 6.02   | 1       | 1.01 | NA      | NA       | NA      |
| Short chain fatty acid meta RNA              | K01512 | acpP             | acylphosphatase [EC:3.6.1.7]                                                                  | 5.02    | 4      | 1.67    | 1.78   | 0.382   | 1.25 | NA      | NA       | NA      |
| Short chain fatty acid meta Transcripts/gene | NA     | acpP             | acylphosphatase [EC:3.6.1.7]                                                                  | 0.276   | 0.222  | 0.107   | 0.0614 | 0.558   | 1.24 | NA      | NA       | NA      |
| Short chain fatty acid meta DNA              | K01580 | gadB, gadA, GAD  | glutamate decarboxylase [EC:4.1.1.15]                                                         | 1.34    | 2.04   | 0.34    | 0.497  | 0.132   | 1.52 | 0.0105  | 0.0258   | 0.021   |
| Short chain fatty acid meta RNA              | K01580 | gadB, gadA, GAD  | glutamate decarboxylase [EC:4.1.1.15]                                                         | 0.0958  | 0.256  | 0.0863  | 0.0885 | 0.0959  | 2.67 | NA      | NA       | NA      |
| Short chain fatty acid meta Transcripts/gene | NA     | gadB, gadA, GAD  | glutamate decarboxylase [EC:4.1.1.15]                                                         | 0.0741  | 0.13   | 0.0647  | 0.051  | 0.114   | 1.76 | NA      | NA       | NA      |
| Short chain fatty acid meta DNA              | K01571 | oadA             | oxaloacetate decarboxylase, alpha subunit [EC:4.1.1.3]                                        | 114     | 141    | 13.6    | 33     | 0.298   | 1.23 | NA      | NA       | NA      |
| Short chain fatty acid meta RNA              | K01571 | oadA             | oxaloacetate decarboxylase, alpha subunit [EC:4.1.1.3]                                        | 381     | 333    | 75.2    | 76.4   | 0.471   | 1.14 | NA      | NA       | NA      |
| Short chain fatty acid meta DNA              | K01572 | oadB             | oxaloacetate decarboxylase, beta subunit [EC:4.1.1.3]                                         | 241     | 263    | 23.2    | 12.5   | 0.394   | 1.09 | NA      | NA       | NA      |
| Short chain fatty acid meta RNA              | K01572 | oadB             | oxaloacetate decarboxylase, beta subunit [EC:4.1.1.3]                                         | 557     | 399    | 105     | 42.2   | 0.0938  | 1.4  | NA      | NA       | NA      |
| Short chain fatty acid meta DNA              | K01573 | oadG             | oxaloacetate decarboxylase, gamma subunit [EC:4.1.1.3]                                        | 1.56    | 1.55   | 0.697   | 0.657  | 1       | 1.01 | NA      | NA       | NA      |
| Short chain fatty acid meta RNA              | K01573 | oadG             | oxaloacetate decarboxylase, gamma subunit [EC:4.1.1.3]                                        | 1.54    | 0.95   | 1.1     | 0.451  | 0.572   | 1.62 | NA      | NA       | NA      |
| Short chain fatty acid meta Transcripts/gene | NA     | oadG             | oxaloacetate decarboxylase, gamma subunit [EC:4.1.1.3]                                        | 2.66    | 1.81   | 0.607   | 0.14   | 0.163   | 1.48 | NA      | NA       | NA      |
| Short chain fatty acid meta DNA              | K01595 | ppc              | phosphoenolpyruvate carboxylase [EC:4.1.1.31]                                                 | 14      | 4.43   | 8.29    | 2.29   | 0.0268  | 3.16 | NA      | NA       | NA      |
| Short chain fatty acid meta RNA              | K01595 | ppc              | phosphoenolpyruvate carboxylase [EC:4.1.1.31]                                                 | 3.85    | 0.874  | 2.36    | 0.238  | 0.00669 | 4.41 | NA      | NA       | NA      |
| Short chain fatty acid meta Transcripts/gene | NA     | ppc              | phosphoenolpyruvate carboxylase [EC:4.1.1.31]                                                 | 0.288   | 0.33   | 0.0779  | 0.351  | 0.708   | 1.15 | NA      | NA       | NA      |
| Short chain fatty acid meta DNA              | K01596 | pckA, PEPCK      | phosphoenolpyruvate carboxykinase (GTP) [EC:4.1.1.32]                                         | 29.8    | 39.1   | 8.76    | 7.07   | 0.252   | 1.31 | NA      | NA       | NA      |
| Short chain fatty acid meta RNA              | K01596 | pckA, PEPCK      | phosphoenolpyruvate carboxykinase (GTP) [EC:4.1.1.32]                                         | 214     | 189    | 73.8    | 75.3   | 0.52    | 1.13 | NA      | NA       | NA      |
| Short chain fatty acid meta Transcripts/gene | NA     | pckA, PEPCK      | phosphoenolpyruvate carboxykinase (GTP) [EC:4.1.1.32]                                         | 7.47    | 4.77   | 2.85    | 1.37   | 0.187   | 1.57 | NA      | NA       | NA      |
| Short chain fatty acid meta DNA              | K01574 | adc              | acetoacetate decarboxylase [EC:4.1.1.4]                                                       | 0.436   | 0.713  | 0.188   | 0.457  | 0.83    | 1.64 | NA      | NA       | NA      |
| Short chain fatty acid meta RNA              | K11264 | mmcD             | methylmalonyl-CoA decarboxylase [EC:4.1.1.41]                                                 | 4.71    | 9.82   | 8.68    | 3.18   | 0.176   | 2.08 | NA      | NA       | NA      |
| Short chain fatty acid meta DNA              | K11264 | mmcD             | methylmalonyl-CoA decarboxylase [EC:4.1.1.41]                                                 | 1.25    | 5.24   | 1.61    | 2.81   | 0.0494  | 4.2  | NA      | NA       | NA      |
| Short chain fatty acid meta Transcripts/gene | NA     | mmcD             | methylmalonyl-CoA decarboxylase [EC:4.1.1.41]                                                 | 0.428   | 0.517  | 0.25    | 0.166  | 0.561   | 1.21 | NA      | NA       | NA      |
| Short chain fatty acid meta DNA              | K01610 | pckA             | phosphoenolpyruvate carboxykinase (ATP) [EC:4.1.1.49]                                         | 392     | 374    | 30.6    | 13.4   | 0.301   | 1.05 | NA      | NA       | NA      |
| Short chain fatty acid meta RNA              | K01610 | pckA             | phosphoenolpyruvate carboxykinase (ATP) [EC:4.1.1.49]                                         | 2130    | 1690   | 414     | 185    | 0.144   | 1.26 | NA      | NA       | NA      |
| Short chain fatty acid meta Transcripts/gene | NA     | pckA             | phosphoenolpyruvate carboxykinase (ATP) [EC:4.1.1.49]                                         | 5.47    | 4.53   | 1.12    | 0.471  | 0.183   | 1.21 | NA      | NA       | NA      |
| Short chain fatty acid meta DNA              | K01575 | alsD, budA, aldC | acetoacetate decarboxylase [EC:4.1.1.5]                                                       | 20.1    | 24.2   | 8.41    | 6.18   | 0.731   | 1.2  | NA      | NA       | NA      |
| Short chain fatty acid meta RNA              | K01575 | alsD, budA, aldC | acetoacetate decarboxylase [EC:4.1.1.5]                                                       | 8.85    | 12.2   | 4.46    | 8.35   | 0.73    | 1.38 | NA      | NA       | NA      |
| Short chain fatty acid meta Transcripts/gene | NA     | alsD, budA, aldC | acetoacetate decarboxylase [EC:4.1.1.5]                                                       | 0.444   | 0.482  | 0.102   | 0.239  | 0.87    | 1.08 | NA      | NA       | NA      |
| Short chain fatty acid meta DNA              | K01615 | gcdA             | glutaconyl-CoA decarboxylase [EC:4.1.1.70]                                                    | 28.7    | 30.6   | 6.56    | 6.46   | 1       | 1.06 | NA      | NA       | NA      |
| Short chain fatty acid meta RNA              | K01615 | gcdA             | glutaconyl-CoA decarboxylase [EC:4.1.1.70]                                                    | 198     | 133    | 45      | 24.3   | 0.0394  | 1.5  | -0.0223 | -0.00841 | -0.0158 |
| Short chain fatty acid meta Transcripts/gene | NA     | gcdA             | glutaconyl-CoA decarboxylase [EC:4.1.1.70]                                                    | 7.13    | 4.38   | 1.78    | 0.578  | 0.037   | 1.63 | NA      | NA       | NA      |
| Short chain fatty acid meta DNA              | K07246 | tuuC, dmlA       | tartrate dehydrogenase/decarboxylase / D-malate dehydrogenase [EC:1.1.1.93 4.1.1.73 1.1.1.83] | 17.3    | 19.7   | 3.46    | 7.97   | 1       | 1.14 | NA      | NA       | NA      |
| Short chain fatty acid meta RNA              | K07246 | tuuC, dmlA       | tartrate dehydrogenase/decarboxylase / D-malate dehydrogenase [EC:1.1.1.93 4.1.1.73 1.1.1.83] | 4.9     | 3.62   | 1.79    | 1.32   | 0.344   | 1.35 | NA      | NA       | NA      |
| Short chain fatty acid meta Transcripts/gene | NA     | tuuC, dmlA       | tartrate dehydrogenase/decarboxylase / D-malate dehydrogenase [EC:1.1.1.93 4.1.1.73 1.1.1.83] | 0.3     | 0.203  | 0.134   | 0.14   | 0.355   | 1.47 | NA      | NA       | NA      |
| Short chain fatty acid meta DNA              | K01578 | MLYCD            | malonyl-CoA decarboxylase [EC:4.1.1.9]                                                        | 0.0179  | 0.0141 | 0.0242  | 0.0103 | 0.989   | 1.27 | NA      | NA       | NA      |

|                                              |         |            |                                                                                                                                                    |        |        |        |        |        |      |         |          |          |
|----------------------------------------------|---------|------------|----------------------------------------------------------------------------------------------------------------------------------------------------|--------|--------|--------|--------|--------|------|---------|----------|----------|
| Short chain fatty acid meta DNA              | K03417  | prpB       | methylisocitrate lyase [EC:4.1.3.30]                                                                                                               | 1.06   | 1.01   | 0.214  | 0.181  | 0.968  | 1.05 | NA      | NA       | NA       |
| Short chain fatty acid meta RNA              | K03417  | prpB       | methylisocitrate lyase [EC:4.1.3.30]                                                                                                               | 0.636  | 0.519  | 0.224  | 0.178  | 0.424  | 1.23 | NA      | NA       | NA       |
| Short chain fatty acid meta Transcripts/gene | NA      | prpB       | methylisocitrate lyase [EC:4.1.3.30]                                                                                                               | 0.65   | 0.529  | 0.366  | 0.208  | 0.958  | 1.23 | NA      | NA       | NA       |
| Short chain fatty acid meta DNA              | K01640  | hmgL       | hydroxymethylglutaryl-CoA lyase [EC:4.1.3.4]                                                                                                       | 5.11   | 4.38   | 1.41   | 1.86   | 0.911  | 1.17 | NA      | NA       | NA       |
| Short chain fatty acid meta RNA              | K01640  | hmgL       | hydroxymethylglutaryl-CoA lyase [EC:4.1.3.4]                                                                                                       | 2.72   | 1.62   | 1.24   | 0.519  | 0.179  | 1.68 | NA      | NA       | NA       |
| Short chain fatty acid meta Transcripts/gene | NA      | hmgL       | hydroxymethylglutaryl-CoA lyase [EC:4.1.3.4]                                                                                                       | 0.566  | 0.441  | 0.254  | 0.212  | 0.45   | 1.28 | NA      | NA       | NA       |
| Short chain fatty acid meta Transcripts/gene | NA      | abfD       | 4-hydroxybutyryl-CoA dehydratase / vinylacetyl-CoA-Delta-isomerase [EC:4.2.1.120 5.3.3.3]                                                          | 1.65   | 1.7    | 0.773  | 0.449  | 0.87   | 1.03 | NA      | NA       | NA       |
| Short chain fatty acid meta DNA              | K01692  | paaf, echa | enoyl-CoA hydratase [EC:4.2.1.17]                                                                                                                  | 13.9   | 9.04   | 3.87   | 2.5    | 0.198  | 1.54 | NA      | NA       | NA       |
| Short chain fatty acid meta RNA              | K01692  | paaf, echa | enoyl-CoA hydratase [EC:4.2.1.17]                                                                                                                  | 40.4   | 8.53   | 42.2   | 2.35   | 0.204  | 4.73 | NA      | NA       | NA       |
| Short chain fatty acid meta RNA              | K07511  | ECHS1      | enoyl-CoA hydratase [EC:4.2.1.17]                                                                                                                  | 0.103  | 0.0399 | 0.0514 | 0.0527 | 0.147  | 2.57 | NA      | NA       | NA       |
| Short chain fatty acid meta Transcripts/gene | NA      | NA         | enoyl-CoA hydratase / long-chain 3-hydroxyacyl-CoA dehydrogenase [EC:4.2.1.17 1.1.1.211]                                                           | 2.46   | 1.04   | 1.97   | 0.218  | 0.37   | 2.37 | NA      | NA       | NA       |
| Short chain fatty acid meta DNA              | K07511  | ECHS1      | enoyl-CoA hydratase [EC:4.2.1.17]                                                                                                                  | 0.0538 | 0.0553 | 0.031  | 0.0491 | 0.989  | 1.03 | NA      | NA       | NA       |
| Short chain fatty acid meta DNA              | K07515  | HADHA      | enoyl-CoA hydratase / long-chain 3-hydroxyacyl-CoA dehydrogenase [EC:4.2.1.17 1.1.1.211]                                                           | 0.0298 | 0.0326 | 0.0212 | 0.0239 | 1      | 1.09 | NA      | NA       | NA       |
| Short chain fatty acid meta RNA              | K07515  | HADHA      | enoyl-CoA hydratase / long-chain 3-hydroxyacyl-CoA dehydrogenase [EC:4.2.1.17 1.1.1.211]                                                           | 0.155  | 0.133  | 0.127  | 0.0792 | 0.989  | 1.17 | NA      | NA       | NA       |
| Short chain fatty acid meta DNA              | K07514  | EHHADH     | enoyl-CoA hydratase / 3-hydroxyacyl-CoA dehydrogenase / 3,2-trans-enoyl-CoA isomerase [EC:4.2.1.17 1.1.1.35 5.3.3.8]                               | 0.0211 | 0.0123 | 0.0139 | 0.0097 | 0.786  | 1.72 | NA      | NA       | NA       |
| Short chain fatty acid meta RNA              | K07514  | EHHADH     | enoyl-CoA hydratase / 3-hydroxyacyl-CoA dehydrogenase / 3,2-trans-enoyl-CoA isomerase [EC:4.2.1.17 1.1.1.35 5.3.3.8]                               | 0.0427 | 0.011  | 0.0332 | 0.0217 | 0.188  | 3.89 | NA      | NA       | NA       |
| Short chain fatty acid meta Transcripts/gene | NA      | acnA       | aconitate hydratase 2 / 2-methylisocitrate dehydratase [EC:4.2.1.3 4.2.1.99]                                                                       | 0.88   | 0.724  | 0.28   | 0.187  | 0.43   | 1.21 | NA      | NA       | NA       |
| Short chain fatty acid meta RNA              | K01682  | acnB       | aconitate hydratase 2 / 2-methylisocitrate dehydratase [EC:4.2.1.3 4.2.1.99]                                                                       | 1.68   | 1.07   | 0.563  | 0.78   | 0.311  | 1.57 | NA      | NA       | NA       |
| Short chain fatty acid meta DNA              | K01682  | acnB       | aconitate hydratase 2 / 2-methylisocitrate dehydratase [EC:4.2.1.3 4.2.1.99]                                                                       | 1.06   | 1.18   | 0.432  | 0.592  | 1      | 1.12 | NA      | NA       | NA       |
| Short chain fatty acid meta DNA              | K01715  | crf        | enoyl-CoA hydratase [EC:4.2.1.17]                                                                                                                  | 47.2   | 48.4   | 5.21   | 8.7    | 1      | 1.03 | NA      | NA       | NA       |
| Short chain fatty acid meta RNA              | K01715  | crf        | 3-hydroxybutyryl-CoA dehydratase [EC:4.2.1.55]                                                                                                     | 161    | 89.6   | 50.2   | 25.7   | 0.0698 | 1.79 | -0.0328 | -0.00798 | -0.0258  |
| Short chain fatty acid meta Transcripts/gene | NA      | crf        | 3-hydroxybutyryl-CoA dehydratase [EC:4.2.1.55]                                                                                                     | 3.28   | 1.86   | 0.992  | 0.477  | 0.037  | 1.76 | NA      | NA       | NA       |
| Short chain fatty acid meta DNA              | K01720  | prpD       | 2-methylcitrate dehydratase [EC:4.2.1.79]                                                                                                          | 0.537  | 0.854  | 0.195  | 0.267  | 0.172  | 1.59 | NA      | NA       | NA       |
| Short chain fatty acid meta RNA              | K01720  | prpD       | 2-methylcitrate dehydratase [EC:4.2.1.79]                                                                                                          | 0.0127 | 0.113  | 0.0181 | 0.0979 | 0.139  | 8.86 | NA      | NA       | NA       |
| Short chain fatty acid meta Transcripts/gene | NA      | prpD       | 2-methylcitrate dehydratase [EC:4.2.1.79]                                                                                                          | 0.0332 | 0.129  | 0.051  | 0.0852 | 0.155  | 3.89 | NA      | NA       | NA       |
| Short chain fatty acid meta Transcripts/gene | NA      | NA         | aconitate hydratase 2 / 2-methylisocitrate dehydratase [EC:4.2.1.3 4.2.1.99]                                                                       | 1.92   | 0.898  | 1.22   | 0.44   | 0.203  | 2.14 | NA      | NA       | NA       |
| Short chain fatty acid meta DNA              | K01734  | mgsA       | methylglyoxal synthase [EC:4.2.3.3]                                                                                                                | 30     | 35.4   | 3.53   | 5.91   | 0.17   | 1.18 | NA      | NA       | NA       |
| Short chain fatty acid meta RNA              | K01734  | mgsA       | methylglyoxal synthase [EC:4.2.3.3]                                                                                                                | 48.3   | 43.5   | 9.59   | 10.7   | 0.572  | 1.11 | NA      | NA       | NA       |
| Short chain fatty acid meta Transcripts/gene | NA      | mgsA       | methylglyoxal synthase [EC:4.2.3.3]                                                                                                                | 1.63   | 1.26   | 0.34   | 0.347  | 0.294  | 1.29 | NA      | NA       | NA       |
| Short chain fatty acid meta DNA              | K01759  | gloA       | lactoylglutathione lyase [EC:4.4.1.5]                                                                                                              | 33.9   | 29.7   | 7.39   | 13     | 0.779  | 1.14 | NA      | NA       | NA       |
| Short chain fatty acid meta RNA              | K01759  | gloA       | lactoylglutathione lyase [EC:4.4.1.5]                                                                                                              | 12.7   | 19.2   | 8.27   | 24.9   | 0.676  | 1.52 | NA      | NA       | NA       |
| Short chain fatty acid meta Transcripts/gene | NA      | gloA       | lactoylglutathione lyase [EC:4.4.1.5]                                                                                                              | 0.361  | 0.537  | 0.181  | 0.522  | 1      | 1.49 | NA      | NA       | NA       |
| Short chain fatty acid meta Transcripts/gene | NA      | fadJ       | 3-hydroxyacyl-CoA dehydrogenase / enoyl-CoA hydratase / 3-hydroxybutyryl-CoA epimerase / enoyl-CoA isomerase [EC:1.1.1.35 4.2.1.17 5.1.2.3 5.3.3.] | 1.94   | 1.76   | 1.2    | 0.856  | 0.832  | 1.1  | NA      | NA       | NA       |
| Short chain fatty acid meta DNA              | K05606  | epi        | methylmalonyl-CoA/ethylmalonyl-CoA epimerase [EC:5.1.99.1]                                                                                         | 47.4   | 48     | 5.44   | 6.07   | 1      | 1.01 | NA      | NA       | NA       |
| Short chain fatty acid meta RNA              | K05606  | epi        | methylmalonyl-CoA/ethylmalonyl-CoA epimerase [EC:5.1.99.1]                                                                                         | 169    | 139    | 20.9   | 22.2   | 0.186  | 1.21 | NA      | NA       | NA       |
| Short chain fatty acid meta Transcripts/gene | NA      | epi        | methylmalonyl-CoA/ethylmalonyl-CoA epimerase [EC:5.1.99.1]                                                                                         | 3.61   | 2.91   | 0.621  | 0.408  | 0.155  | 1.24 | NA      | NA       | NA       |
| Short chain fatty acid meta DNA              | K01799  | nicE, maiA | maleate isomerase [EC:5.2.1.1]                                                                                                                     | 0.232  | 0.237  | 0.066  | 0.0728 | 1      | 1.02 | NA      | NA       | NA       |
| Short chain fatty acid meta RNA              | K01799  | nicE, maiA | maleate isomerase [EC:5.2.1.1]                                                                                                                     | 0.0238 | 0.0238 | 0.0371 | 0.025  | 0.895  | 1    | NA      | NA       | NA       |
| Short chain fatty acid meta Transcripts/gene | NA      | nicE, maiA | maleate isomerase [EC:5.2.1.1]                                                                                                                     | 0.0947 | 0.098  | 0.137  | 0.0946 | 0.87   | 1.03 | NA      | NA       | NA       |
| Short chain fatty acid meta DNA              | K14534  | abfD       | 4-hydroxybutyryl-CoA dehydratase / vinylacetyl-CoA-Delta-isomerase [EC:4.2.1.120 5.3.3.3]                                                          | 19     | 12.7   | 4.26   | 4.13   | 0.174  | 1.49 | -0.0131 | -0.00533 | -0.00934 |
| Short chain fatty acid meta RNA              | K14534  | abfD       | 4-hydroxybutyryl-CoA dehydratase / vinylacetyl-CoA-Delta-isomerase [EC:4.2.1.120 5.3.3.3]                                                          | 29.4   | 21.7   | 9.8    | 8.35   | 0.424  | 1.36 | NA      | NA       | NA       |
| Short chain fatty acid meta Transcripts/gene | NA      | abfD       | 4-hydroxybutyryl-CoA dehydratase / vinylacetyl-CoA-Delta-isomerase [EC:4.2.1.120 5.3.3.3]                                                          | 1.65   | 1.7    | 0.773  | 0.449  | 0.87   | 1.03 | NA      | NA       | NA       |
| Short chain fatty acid meta DNA              | NA      | EHHADH     | enoyl-CoA hydratase / 3-hydroxyacyl-CoA dehydrogenase / 3,2-trans-enoyl-CoA isomerase [EC:4.2.1.17 1.1.1.35 5.3.3.8]                               | 3.71   | 3.34   | 3.59   | 2.13   | 0.832  | 1.11 | NA      | NA       | NA       |
| Short chain fatty acid meta Transcripts/gene | K01847  | MUT        | methylmalonyl-CoA mutase [EC:5.4.99.2]                                                                                                             | 410    | 414    | 55.7   | 64     | 1      | 1.01 | NA      | NA       | NA       |
| Short chain fatty acid meta RNA              | K01847  | MUT        | methylmalonyl-CoA mutase [EC:5.4.99.2]                                                                                                             | 1320   | 1270   | 307    | 237    | 0.73   | 1.04 | NA      | NA       | NA       |
| Short chain fatty acid meta DNA              | K01848  | mcmA1      | methylmalonyl-CoA mutase, N-terminal domain [EC:5.4.99.2]                                                                                          | 13.4   | 10.9   | 4.18   | 2.42   | 0.779  | 1.23 | NA      | NA       | NA       |
| Short chain fatty acid meta RNA              | K01848  | mcmA1      | methylmalonyl-CoA mutase, N-terminal domain [EC:5.4.99.2]                                                                                          | 435    | 250    | 92.3   | 60.7   | 0.0164 | 1.74 | -0.0262 | -0.0127  | -0.0202  |
| Short chain fatty acid meta DNA              | K01849  | mcmA2      | methylmalonyl-CoA mutase, C-terminal domain [EC:5.4.99.2]                                                                                          | 3.9    | 3.29   | 1.22   | 0.726  | 0.938  | 1.18 | NA      | NA       | NA       |
| Short chain fatty acid meta RNA              | K01849  | mcmA2      | methylmalonyl-CoA mutase, C-terminal domain [EC:5.4.99.2]                                                                                          | 90     | 52.8   | 23.5   | 10.4   | 0.0164 | 1.71 | -0.024  | -0.0113  | -0.0185  |
| Short chain fatty acid meta Transcripts/gene | K1194.2 | NA         | methylmalonyl-CoA mutase [EC:5.4.99.2]                                                                                                             | 0.0325 | 0.0316 | 0.0231 | 0.0128 | 0.968  | 1.03 | NA      | NA       | NA       |
| Short chain fatty acid meta Transcripts/gene | NA      | mcmA2      | methylmalonyl-CoA mutase, C-terminal domain [EC:5.4.99.2]                                                                                          | 4.39   | 3.69   | 0.936  | 0.57   | 0.336  | 1.19 | NA      | NA       | NA       |
| Short chain fatty acid meta DNA              | K01895  | acs        | acetyl-CoA synthetase [EC:6.2.1.1]                                                                                                                 | 264    | 319    | 29.4   | 22.4   | 0.0906 | 1.21 | NA      | NA       | NA       |
| Short chain fatty acid meta RNA              | K01895  | acs        | acetyl-CoA synthetase [EC:6.2.1.1]                                                                                                                 | 491    | 458    | 133    | 167    | 0.895  | 1.07 | NA      | NA       | NA       |
| Short chain fatty acid meta Transcripts/gene | NA      | acs        | acetyl-CoA synthetase [EC:6.2.1.1]                                                                                                                 | 1.9    | 1.44   | 0.616  | 0.503  | 0.471  | 1.32 | NA      | NA       | NA       |
| Short chain fatty acid meta DNA              | K01905  | NA         | acetyl-CoA synthetase (ADP-forming) [EC:6.2.1.13]                                                                                                  | 2.45   | 3.82   | 0.709  | 1.38   | 0.45   | 1.56 | NA      | NA       | NA       |
| Short chain fatty acid meta RNA              | K01905  | NA         | acetyl-CoA synthetase (ADP-forming) [EC:6.2.1.13]                                                                                                  | 1.77   | 3.54   | 0.638  | 0.783  | 0.0269 | 2    | NA      | NA       | NA       |
| Short chain fatty acid meta Transcripts/gene | NA      | NA         | acetyl-CoA synthetase (ADP-forming) [EC:6.2.1.13]                                                                                                  | 0.752  | 0.977  | 0.296  | 0.216  | 0.186  | 1.3  | NA      | NA       | NA       |
| Short chain fatty acid meta DNA              | K01907  | acsA       | acetoacetyl-CoA synthetase [EC:6.2.1.16]                                                                                                           | 1.18   | 2.06   | 0.377  | 0.757  | 0.25   | 1.74 | NA      | NA       | NA       |
| Short chain fatty acid meta RNA              | K01907  | acsA       | acetoacetyl-CoA synthetase [EC:6.2.1.16]                                                                                                           | 0.555  | 0.966  | 0.437  | 0.61   | 0.253  | 1.74 | NA      | NA       | NA       |
| Short chain fatty acid meta Transcripts/gene | NA      | acsA       | acetoacetyl-CoA synthetase [EC:6.2.1.16]                                                                                                           | 0.443  | 0.461  | 0.273  | 0.183  | 0.87   | 1.04 | NA      | NA       | NA       |
| Short chain fatty acid meta DNA              | K01908  | prpE       | propionyl-CoA synthetase [EC:6.2.1.17]                                                                                                             | 5.34   | 3.86   | 2.95   | 0.646  | 0.99   | 1.38 | NA      | NA       | NA       |
| Short chain fatty acid meta RNA              | K01908  | prpE       | propionyl-CoA synthetase [EC:6.2.1.17]                                                                                                             | 0.315  | 0.402  | 0.171  | 0.266  | 0.73   | 1.27 | NA      | NA       | NA       |
| Short chain fatty acid meta Transcripts/gene | NA      | prpE       | propionyl-CoA synthetase [EC:6.2.1.17]                                                                                                             | 0.0769 | 0.0999 | 0.0656 | 0.0472 | 0.489  | 1.3  | NA      | NA       | NA       |
| Short chain fatty acid meta DNA              | K01896  | ACSM       | medium-chain acyl-CoA synthetase [EC:6.2.1.2]                                                                                                      | 1.06   | 1.48   | 0.394  | 0.438  | 0.62   | 1.39 | NA      | NA       | NA       |
| Short chain fatty acid meta RNA              | K01896  | ACSM       | medium-chain acyl-CoA synthetase [EC:6.2.1.2]                                                                                                      | 1.8    | 1.81   | 0.535  | 0.85   | 0.895  | 1    | NA      | NA       | NA       |
| Short chain fatty acid meta Transcripts/gene | NA      | ACSM       | medium-chain acyl-CoA synthetase [EC:6.2.1.2]                                                                                                      | 1.96   | 1.25   | 1.3    | 0.498  | 0.355  | 1.58 | NA      | NA       | NA       |
| Short chain fatty acid meta DNA              | K01900  | LSC2       | succinyl-CoA synthetase beta subunit [EC:6.2.1.4 6.2.1.5]                                                                                          | 25.8   | 19.2   | 14.3   | 10.1   | 0.5    | 1.35 | NA      | NA       | NA       |
| Short chain fatty acid meta RNA              | K01900  | LSC2       | succinyl-CoA synthetase beta subunit [EC:6.2.1.4 6.2.1.5]                                                                                          | 4.78   | 3.78   | 3.46   | 1.82   | 0.989  | 1.27 | NA      | NA       | NA       |
| Short chain fatty acid meta DNA              | K01899  | LSC1       | succinyl-CoA synthetase alpha subunit [EC:6.2.1.4 6.2.1.5]                                                                                         | 0.0962 | 0.136  | 0.0626 | 0.092  | 0.911  | 1.42 | NA      | NA       | NA       |
| Short chain fatty acid meta RNA              | K01899  | LSC1       | succinyl-CoA synthetase alpha subunit [EC:6.2.1.4 6.2.1.5]                                                                                         | 3.4    | 2.69   | 2.6    | 1.27   | 1      | 1.27 | NA      | NA       | NA       |
| Short chain fatty acid meta DNA              | K01900  | LSC2       | succinyl-CoA synthetase beta subunit [EC:6.2.1.4 6.2.1.5]                                                                                          | 0.209  | 0.229  | 0.0404 | 0.0503 | 0.875  | 1.1  | NA      | NA       | NA       |
| Short chain fatty acid meta RNA              | K01902  | sucD       | succinyl-CoA synthetase alpha subunit [EC:6.2.1.5]                                                                                                 | 13.7   | 16     | 3.33   | 8.69   | 1      | 1.17 | NA      | NA       | NA       |
| Short chain fatty acid meta DNA              | K01902  | sucD       | succinyl-CoA synthetase alpha subunit [EC:6.2.1.5]                                                                                                 | 19.4   | 33.8   | 8.77   | 31.9   | 1      | 1.75 | NA      | NA       | NA       |
| Short chain fatty acid meta RNA              | K01903  | sucC       | succinyl-CoA synthetase beta subunit [EC:6.2.1.5]                                                                                                  | 18.7   | 21.5   | 3.77   | 10.9   | 1      | 1.15 | NA      | NA       | NA       |
| Short chain fatty acid meta DNA              | K01903  | sucC       | succinyl-CoA synthetase beta subunit [EC:6.2.1.5]                                                                                                  | 23.4   | 40.9   | 13.6   | 39.7   | 0.944  | 1.75 | NA      | NA       | NA       |
| Short chain fatty acid meta Transcripts/gene | NA      | ACACA      | acetyl-CoA carboxylase / biotin carboxylase [EC:6.4.1.2 6.3.4.14]                                                                                  | 1.63   | 2.1    | 0.923  | 1.72   | 0.896  | 1.29 | NA      | NA       | NA       |
| Short chain fatty acid meta DNA              | K01958  | pyc        | pyruvate carboxylase [EC:6.4.1.1]                                                                                                                  | 0.637  | 0.824  | 0.174  | 0.192  | 0.323  | 1.29 | NA      | NA       | NA       |
| Short chain fatty acid meta RNA              | K01958  | pyc        | pyruvate carboxylase [EC:6.4.1.1]                                                                                                                  | 69.2   | 57.8   | 16.9   | 16.2   | 0.83   | 1.2  | NA      | NA       | NA       |
| Short chain fatty acid meta Transcripts/gene | NA      | pycA       | pyruvate carboxylase subunit A [EC:6.4.1.1]                                                                                                        | 45.2   | 30.6   | 11.3   | 6.65   | 0.0968 | 1.48 | NA      | NA       | NA       |
| Short chain fatty acid meta DNA              | K01959  | pycA       | pyruvate carboxylase subunit A [EC:6.4.1.1]                                                                                                        | 9.52   | 9.54   | 2.05   | 3.39   | 1      | 1    | NA      | NA       | NA       |
| Short chain fatty acid meta RNA              | K01959  | pycA       | pyruvate carboxylase subunit A [EC:6.4.1.1]                                                                                                        | 1.54   | 3      | 0.375  | 1.01   | 0.0364 | 1.95 | NA      | NA       | NA       |
| Short chain fatty acid meta DNA              | K01960  | pycB       | pyruvate carboxylase subunit B [EC:6.4.1.1]                                                                                                        | 2.49   | 255    | 26.4   | 23.4   | 0.989  | 1.02 | NA      | NA       | NA       |
| Short chain fatty acid meta RNA              | K01960  | pycB       | pyruvate carboxylase subunit B [EC:6.4.1.1]                                                                                                        | 501    | 455    | 80.7   | 61.6   | 0.382  | 1.1  | NA      | NA       | NA       |
| Short chain fatty acid meta Transcripts/gene | NA      | pycB       | pyruvate carboxylase subunit B [EC:6.4.1.1]                                                                                                        | 1.71   | 1.52   | 0.413  | 0.163  | 0.652  | 1.13 | NA      | NA       | NA       |

|                                              |        |            |                                                                                 |        |        |         |        |        |      |         |         |         |
|----------------------------------------------|--------|------------|---------------------------------------------------------------------------------|--------|--------|---------|--------|--------|------|---------|---------|---------|
| Short chain fatty acid meta DNA              | K01962 | accA       | acetyl-CoA carboxylase carboxyl transferase subunit alpha [EC:6.4.1.2]          | 44     | 32.8   | 8.67    | 6.6    | 0.134  | 1.34 | NA      | NA      | NA      |
| Short chain fatty acid meta RNA              | K01962 | accA       | acetyl-CoA carboxylase carboxyl transferase subunit alpha [EC:6.4.1.2]          | 14     | 16.5   | 3.72    | 4.73   | 0.73   | 1.17 | NA      | NA      | NA      |
| Short chain fatty acid meta DNA              | K01963 | accD       | acetyl-CoA carboxylase carboxyl transferase subunit beta [EC:6.4.1.2]           | 39.8   | 28.2   | 8.47    | 4.28   | 0.0993 | 1.41 | NA      | NA      | NA      |
| Short chain fatty acid meta RNA              | K01963 | accD       | acetyl-CoA carboxylase carboxyl transferase subunit beta [EC:6.4.1.2]           | 16.7   | 18.1   | 3.22    | 4.4    | 0.788  | 1.08 | NA      | NA      | NA      |
| Short chain fatty acid meta Transcripts/gene | NA     | accD       | acetyl-CoA/propionyl-CoA carboxylase [EC:6.4.1.2 6.4.1.3]                       | 0.487  | 0.668  | 0.163   | 0.128  | 0.174  | 1.37 | NA      | NA      | NA      |
| Short chain fatty acid meta DNA              | K01961 | accC       | acetyl-CoA carboxylase, biotin carboxylase subunit [EC:6.4.1.2 6.3.4.14]        | 76.9   | 56.7   | 19      | 11.9   | 0.346  | 1.36 | NA      | NA      | NA      |
| Short chain fatty acid meta RNA              | K01961 | accC       | acetyl-CoA carboxylase, biotin carboxylase subunit [EC:6.4.1.2 6.3.4.14]        | 36.6   | 39.9   | 9.39    | 11.9   | 0.79   | 1.09 | NA      | NA      | NA      |
| Short chain fatty acid meta DNA              | K11262 | ACACA      | acetyl-CoA carboxylase / biotin carboxylase [EC:6.4.1.2 6.3.4.14]               | 0.151  | 0.108  | 0.0849  | 0.0254 | 0.911  | 1.4  | NA      | NA      | NA      |
| Short chain fatty acid meta RNA              | K11262 | ACACA      | acetyl-CoA carboxylase / biotin carboxylase [EC:6.4.1.2 6.3.4.14]               | 0.264  | 0.308  | 0.177   | 0.0254 | 0.788  | 1.17 | NA      | NA      | NA      |
| Short chain fatty acid meta DNA              | K01964 | accC       | acetyl-CoA/propionyl-CoA carboxylase [EC:6.4.1.2 6.4.1.3]                       | 0.0454 | 0.0694 | 0.0259  | 0.0161 | 0.246  | 1.53 | NA      | NA      | NA      |
| Short chain fatty acid meta RNA              | K01964 | accC       | acetyl-CoA/propionyl-CoA carboxylase [EC:6.4.1.2 6.4.1.3]                       | 0.0421 | 0.0704 | 0.043   | 0.0824 | 0.843  | 1.67 | NA      | NA      | NA      |
| Short chain fatty acid meta DNA              | K15036 | pccB       | acetyl-CoA/propionyl-CoA carboxylase [EC:6.4.1.2 6.4.1.3]                       | 1.42   | 1.59   | 0.369   | 0.529  | 0.875  | 1.11 | NA      | NA      | NA      |
| Short chain fatty acid meta RNA              | K15036 | pccB       | acetyl-CoA/propionyl-CoA carboxylase [EC:6.4.1.2 6.4.1.3]                       | 7.53   | 5.46   | 1.74    | 1.14   | 0.102  | 1.38 | NA      | NA      | NA      |
| Short chain fatty acid meta DNA              | K01965 | pccA       | propionyl-CoA carboxylase alpha chain [EC:6.4.1.3]                              | 3.99   | 3.86   | 1.15    | 0.812  | 1      | 1.03 | NA      | NA      | NA      |
| Short chain fatty acid meta RNA              | K01965 | pccA       | propionyl-CoA carboxylase alpha chain [EC:6.4.1.3]                              | 9.99   | 6.81   | 2.91    | 1.52   | 0.144  | 1.47 | NA      | NA      | NA      |
| Short chain fatty acid meta DNA              | K01966 | pccB       | propionyl-CoA carboxylase beta chain [EC:6.4.1.3]                               | 241    | 254    | 26.6    | 11.4   | 0.968  | 1.05 | NA      | NA      | NA      |
| Short chain fatty acid meta RNA              | K01966 | pccB       | propionyl-CoA carboxylase beta chain [EC:6.4.1.3]                               | 1070   | 799    | 142     | 115    | 0.0212 | 1.34 | NA      | NA      | NA      |
| Short chain fatty acid meta Transcripts/gene | NA     | pccA/pccB  | acetyl-CoA/propionyl-CoA carboxylase [EC:6.4.1.2 6.4.1.3]                       | 4.49   | 3.11   | 0.865   | 0.369  | 0.0772 | 1.44 | NA      | NA      | NA      |
| Short chain fatty acid meta DNA              | K00100 | NA         | NA                                                                              | 913    | 882    | 75.1    | 58.6   | 0.968  | 1.03 | NA      | NA      | NA      |
| Short chain fatty acid meta RNA              | K00100 | NA         | NA                                                                              | 529    | 409    | 49      | 38.5   | 0.0164 | 1.29 | -0.0385 | -0.0101 | -0.0276 |
| Short chain fatty acid meta DNA              | K00241 | sdhC, frdC | succinate dehydrogenase cytochrome b556 subunit                                 | 110    | 99.4   | 11.7    | 13.3   | 0.675  | 1.11 | NA      | NA      | NA      |
| Short chain fatty acid meta RNA              | K00241 | sdhC, frdC | succinate dehydrogenase cytochrome b556 subunit                                 | 273    | 267    | 33.1    | 40.6   | 0.989  | 1.02 | NA      | NA      | NA      |
| Short chain fatty acid meta DNA              | K00242 | sdhD, frdD | succinate dehydrogenase membrane anchor subunit                                 | 0.0469 | 0.0374 | 0.0345  | 0.0134 | 1      | 1.25 | NA      | NA      | NA      |
| Short chain fatty acid meta RNA              | K00242 | sdhD, frdD | succinate dehydrogenase membrane anchor subunit                                 | 0.0741 | 0.0526 | 0.0763  | 0.0694 | 0.571  | 1.41 | NA      | NA      | NA      |
| Short chain fatty acid meta DNA              | K00246 | frdC       | fumarate reductase subunit C                                                    | 0.159  | 0.17   | 0.038   | 0.0701 | 1      | 1.07 | NA      | NA      | NA      |
| Short chain fatty acid meta RNA              | K00246 | frdC       | fumarate reductase subunit C                                                    | 0.913  | 0.241  | 0.974   | 0.134  | 0.623  | 3.78 | NA      | NA      | NA      |
| Short chain fatty acid meta DNA              | K00247 | frdD       | fumarate reductase subunit D                                                    | 0.042  | 0.0701 | 0.0269  | 0.0768 | 1      | 1.67 | NA      | NA      | NA      |
| Short chain fatty acid meta RNA              | K00247 | frdD       | fumarate reductase subunit D                                                    | 0.0376 | 0.118  | 0.0368  | 0.111  | 0.247  | 3.15 | NA      | NA      | NA      |
| Short chain fatty acid meta DNA              | K01726 | NA         | NA                                                                              | 203    | 204    | 36.2    | 12.4   | 0.875  | 1.01 | NA      | NA      | NA      |
| Short chain fatty acid meta RNA              | K01726 | NA         | NA                                                                              | 113    | 103    | 17.7    | 7.05   | 0.519  | 1.09 | NA      | NA      | NA      |
| Short chain fatty acid meta DNA              | K02160 | accB, bccP | acetyl-CoA carboxylase biotin carboxyl carrier protein                          | 18.1   | 14.6   | 2.89    | 1.73   | 0.0962 | 1.24 | NA      | NA      | NA      |
| Short chain fatty acid meta RNA              | K02160 | accB, bccP | acetyl-CoA carboxylase biotin carboxyl carrier protein                          | 11.3   | 9.88   | 3.01    | 1.47   | 0.731  | 1.14 | NA      | NA      | NA      |
| Short chain fatty acid meta DNA              | K03821 | phbC, phaC | polyhydroxyalkanoate synthase [EC:2.3.1.-]                                      | 0.66   | 0.626  | 0.197   | 0.153  | 1      | 1.05 | NA      | NA      | NA      |
| Short chain fatty acid meta RNA              | K03821 | phbC, phaC | polyhydroxyalkanoate synthase [EC:2.3.1.-]                                      | 1.8    | 2.05   | 0.801   | 0.673  | 0.676  | 1.14 | NA      | NA      | NA      |
| Short chain fatty acid meta DNA              | K04020 | eutD       | phosphotransacetylase                                                           | 0.283  | 0.305  | 0.064   | 0.154  | 1      | 1.08 | NA      | NA      | NA      |
| Short chain fatty acid meta RNA              | K04020 | eutD       | phosphotransacetylase                                                           | 0.093  | 0.164  | 0.0661  | 0.0848 | 0.312  | 1.76 | NA      | NA      | NA      |
| Short chain fatty acid meta DNA              | K04021 | eutE       | aldehyde dehydrogenase                                                          | 0.586  | 0.438  | 0.178   | 0.145  | 0.675  | 1.34 | NA      | NA      | NA      |
| Short chain fatty acid meta RNA              | K04021 | eutE       | aldehyde dehydrogenase                                                          | 1.52   | 1.13   | 0.411   | 0.334  | 0.311  | 1.34 | NA      | NA      | NA      |
| Short chain fatty acid meta DNA              | K13997 | PDHX       | dihydropyruvate dehydrogenase-binding protein of pyruvate dehydrogenase complex | 0.0147 | 0.0111 | 0.00776 | 0.0062 | 0.875  | 1.33 | NA      | NA      | NA      |
| Short chain fatty acid meta RNA              | K15037 | NA         | biotin carboxyl carrier protein                                                 | 0.147  | 0.119  | 0.0584  | 0.0306 | 0.938  | 1.24 | NA      | NA      | NA      |
| Short chain fatty acid meta DNA              | K15037 | NA         | biotin carboxyl carrier protein                                                 | 0.0592 | 0.0414 | 0.0507  | 0.047  | 0.652  | 1.43 | NA      | NA      | NA      |
