# Supplementary material for: Rumen metagenome and metatranscriptome analyses of low methane yield sheep reveals a Sharpea-enriched microbiome characterised by lactic acid formation and utilisation
Source: PubMed Central journal article supplement (PMC5069950; doi:10.1186/s40168-016-0201-2), 2016-10-19
Supplement: 40168_2016_201_MOESM10_ESM.pdf [file 40168_2016_201_MOESM10_ESM.pdf]

Table S5. Read mapping statistics of metagenome and metatranscriptome data for *lcdA* genes.

|                   | Low methane yield      |                    | High methane yield     |                    | Fold change | <i>P</i> -value |
|-------------------|------------------------|--------------------|------------------------|--------------------|-------------|-----------------|
|                   | Mean read counts (RPM) | Standard deviation | Mean read counts (RPM) | Standard deviation |             |                 |
| Metagenome        | 6.757                  | 8.176              | 0.370                  | 0.190              | 18.26       | 0.024           |
| Metatranscriptome | 0.549                  | 0.369              | 0.453                  | 0.143              | 1.21        | 0.958           |
